# Supplementary material for: Phylogenetic comparison between Type IX Secretion System (T9SS) protein components suggests evidence of horizontal gene transfer
Source: PeerJ. 2020 Jun 26;8:e9019. doi: 10.7717/peerj.9019 (PMC7323717; doi:10.7717/peerj.9019)
Supplement: Supplemental Information 2 [file peerj-08-9019-s002.xlsx]

## Sheet: Sheet2
NCBI Refseq ID	Sequence description
NR_113086.1	Porphyromonas gingivalis strain JCM 12257 16S ribosomal RNA, partial sequence
NR_074464.1	Cellulophaga lytica strain DSM 7489 16S ribosomal RNA, partial sequence
NR_044738.2	Flavobacterium johnsoniae strain ATCC 23107 16S ribosomal RNA, partial sequence
NR_040907.1	Flavobacterium columnare strain IFO 15943 16S ribosomal RNA, partial sequence
NR_112940.1	Bacteroides ovatus strain JCM 5824 16S ribosomal RNA, partial sequence
NR_113106.1	Prevotella intermedia strain JCM 12248 16S ribosomal RNA, partial sequence
NR_074429.1	Riemerella anatipestifer strain DSM 15868 16S ribosomal RNA, partial sequence
NR_113562.1	Capnocytophaga haemolytica strain JCM 8565 16S ribosomal RNA, partial sequence
NR_074684.1	Zobellia galactanivorans strain DsiJ 16S ribosomal RNA, partial sequence
NR_113104.1	Prevotella enoeca strain JCM 12259 16S ribosomal RNA, partial sequence
NR_042354.1	Myroides odoratimimus strain CCUG 39352 16S ribosomal RNA, partial sequence
NR_113883.1	Flavobacterium psychrophilum strain NBRC 100250 16S ribosomal RNA, partial sequence
NR_036862.1	Elizabethkingia miricola strain W3-B1 16S ribosomal RNA, partial sequence
NR_025534.1	Pedobacter cryoconitis strain A37 16S ribosomal RNA, partial sequence
NR_112933.1	Bacteroides cellulosilyticus strain JCM 15632 16S ribosomal RNA, partial sequence
NR_102866.1	Cytophaga hutchinsonii ATCC 33406 16S ribosomal RNA, partial sequence
NR_074895.2	Salinibacter ruber DSM 13855 strain M31 16S ribosomal RNA, complete sequence
NR_074147.1	Psychroflexus torquis ATCC 700755 16S ribosomal RNA, partial sequence
NR_074601.1	Robiginitalea biformata HTCC2501 16S ribosomal RNA, partial sequence
NR_043296.1	Cyclobacterium amurskyense strain KMM 6143 16S ribosomal RNA, partial sequence
NR_041351.1	Bacteroides dorei strain 175 16S ribosomal RNA, partial sequence
NR_044004.1	Pontibacter korlensis strain X14-1 16S ribosomal RNA, partial sequence
NR_042605.1	Pedobacter steynii strain WB 2.3-45 16S ribosomal RNA, partial sequence
NR_040838.1	Porphyromonas gingivalis ATCC 33277 16S ribosomal RNA, partial sequence
NR_074376.1	Parabacteroides distasonis ATCC 8503 16S ribosomal RNA, partial sequence
NR_074368.1	Dyadobacter fermentans DSM 18053 strain NS114 16S ribosomal RNA, partial sequence
NR_044435.1	Myroides profundi strain D25 16S ribosomal RNA, partial sequence
NR_074566.1	Chitinophaga pinensis DSM 2588 16S ribosomal RNA, partial sequence
NR_116350.1	Rufibacter tibetensis strain 1351 16S ribosomal RNA, partial sequence
NR_116363.1	Muricauda lutaonensis strain CC-HSB-11 16S ribosomal RNA, partial sequence
NR_029282.2	Rhodothermus marinus DSM 4252 strain R-10 16S ribosomal RNA, complete sequence
NR_102895.1	Prevotella melaninogenica ATCC 25845 16S ribosomal RNA, partial sequence
NR_043471.1	Nonlabens dokdonensis DSW-6 16S ribosomal RNA, partial sequence
NR_074493.1	Marivirga tractuosa DSM 4126 16S ribosomal RNA, partial sequence
NR_074303.1	Leadbetterella byssophila DSM 17132 16S ribosomal RNA, partial sequence
NR_074656.1	Zunongwangia profunda SM-A87 strain SMA-87 16S ribosomal RNA, partial sequence
NR_108475.1	Tenacibaculum dicentrarchi strain 35/09 16S ribosomal RNA, partial sequence
NR_115300.1	Alistipes finegoldii DSM 17242 strain CIP 107999 16S ribosomal RNA, partial sequence
NR_026025.1	Riemerella anatipestifer ATCC 11845 = DSM 15868 16S ribosomal RNA, partial sequence
NR_074577.1	Paludibacter propionicigenes WB4 16S ribosomal RNA, partial sequence
NR_074595.1	Niastella koreensis GR20-10 16S ribosomal RNA, partial sequence
NR_025031.1	Aequorivita sublithincola DSM 14238 strain QSSC9-3 16S ribosomal RNA, partial sequence
NR_041911.1	Fluviicola taffensis DSM 16823 strain RW262 16S ribosomal RNA, partial sequence
NR_074339.1	Runella slithyformis DSM 19594 16S ribosomal RNA, partial sequence
NR_074586.1	Pseudopedobacter saltans DSM 12145 16S ribosomal RNA, partial sequence
NR_102864.1	Belliella baltica DSM 15883 16S ribosomal RNA, partial sequence
NR_115475.1	Cellulophaga lytica DSM 7489 strain ATCC 23178 16S ribosomal RNA, partial sequence
NR_102940.1	Ornithobacterium rhinotracheale DSM 15997 16S ribosomal RNA, partial sequence
NR_044635.1	Porphyromonas asaccharolytica DSM 20707 16S ribosomal RNA, partial sequence
NR_074538.1	Cyclobacterium marinum DSM 745 16S ribosomal RNA, partial sequence
NR_102950.1	Bernardetia litoralis DSM 6794 16S ribosomal RNA, partial sequence
NR_074562.1	Muricauda ruestringensis DSM 13258 16S ribosomal RNA, partial sequence
NR_102481.1	Prevotella dentalis DSM 3688 16S ribosomal RNA, partial sequence
NR_040990.1	Owenweeksia hongkongensis DSM 17368 strain UST20020801 16S ribosomal RNA, partial sequence
NR_074099.1	Solitalea canadensis DSM 3403 16S ribosomal RNA, partial sequence
NR_074305.1	Emticicia oligotrophica DSM 17448 strain GPTSA100-15 16S ribosomal RNA, partial sequence
NR_044301.1	Niabella soli DSM 19437 strain JS13-8 16S ribosomal RNA, partial sequence
NR_118097.1	Polaribacter reichenbachii strain KMM 6386 16S ribosomal RNA, partial sequence
NR_074422.1	Flavobacterium indicum GPTSA100-9 = DSM 17447 16S ribosomal RNA, partial sequence
NR_116021.1	Elizabethkingia anophelis strain R26 16S ribosomal RNA, partial sequence
NR_116809.1	Prevotella intermedia ATCC 25611 = DSM 20706 16S ribosomal RNA, partial sequence
NR_121783.2	Draconibacterium orientale strain FH5 16S ribosomal RNA, complete sequence
NR_121786.1	Hymenobacter swuensis DY53 16S ribosomal RNA, partial sequence
NR_125633.1	Gramella flava JLT2011 16S ribosomal RNA, partial sequence
NR_114304.1	Prevotella fusca JCM 17724 16S ribosomal RNA, partial sequence
NR_159275.1	Flavobacterium commune strain PK15 16S ribosomal RNA, complete sequence
NR_149761.1	Salinivirga cyanobacteriivorans strain L21-Spi-D4 16S ribosomal RNA, partial sequence
NR_133726.1	Chryseobacterium gallinarum strain 100 16S ribosomal RNA, partial sequence
NR_149196.1	Spirosoma radiotolerans strain DG5A 16S ribosomal RNA, partial sequence
NR_146696.1	Hymenobacter sedentarius strain DG5B 16S ribosomal RNA, partial sequence
NR_134840.1	Mucinivorans hirudinis strain M3 16S ribosomal RNA, partial sequence >NR_134841.1 Mucinivorans hirudinis strain M3 16S ribosomal RNA, partial sequence
NR_117818.1	Siansivirga zeaxanthinifaciens CC-SAMT-1 16S ribosomal RNA, partial sequence
NR_145942.1	Lacinutrix venerupis strain Cmf 20.8 16S ribosomal RNA, partial sequence
NR_156053.1	Flavobacterium gilvum strain EM1308 16S ribosomal RNA, partial sequence
NR_151969.1	Flavisolibacter tropicus strain LCS9 16S ribosomal RNA, partial sequence
NR_148809.1	Fermentimonas caenicola strain ING2-E5B 16S ribosomal RNA, partial sequence
NR_149758.1	Lutibacter profundi strain LP1 16S ribosomal RNA, partial sequence >NR_151859.1 Lutibacter profundi strain LP1 16S ribosomal RNA, complete sequence
NR_148808.1	Petrimonas mucosa strain ING2-E5A 16S ribosomal RNA, partial sequence
NR_148807.1	Proteiniphilum saccharofermentans strain M3/6 16S ribosomal RNA, partial sequence
NR_159892.1	Chryseobacterium glaciei strain IHBB 10212 16S ribosomal RNA, partial sequence
NR_136880.1	Algibacter alginicilyticus strain HZ22 16S ribosomal RNA, partial sequence
NR_156039.1	Polaribacter vadi strain LPB0003 16S ribosomal RNA, partial sequence
NR_151962.1	Wenyingzhuangia fucanilytica strain CZ1127 16S ribosomal RNA, partial sequence
NR_144606.1	Bacteroides caecimuris strain I48 16S ribosomal RNA, partial sequence
NC_016610.1:c3363341-3361809	Tannerella forsythia 92A2, complete genome
NC_014230.1:2125341-2126861	Croceibacter atlanticus HTCC2559, complete genome
NC_002950.2:c1346863-1345322	Porphyromonas gingivalis W83, complete genome
NC_017861.1:855790-857247	Prevotella intermedia 17 chromosome II, complete sequence
NC_014033.1:3605760-3607292	Prevotella ruminicola 23, complete genome
NC_020830.1:2956208-2957715	Polaribacter sp. MED152, complete genome
NC_014472.1:2282568-2284121	Maribacter sp. HTCC2170, complete genome
NC_009441.1:c5123816-5122299	Flavobacterium johnsoniae UW101, complete genome
NC_009613.3:1113689-1115188	Flavobacterium psychrophilum JIP02/86 complete genome
AF235117.1	Gramella forsetii KT0803 16S ribosomal RNA gene, partial sequence
NC_013061.1:c4307551-4306042	Pedobacter heparinus DSM 2366, complete genome
NC_013730.1:7141933-7143427	Spirosoma linguale DSM 74, complete genome
NC_011565.1:61786-63306	Candidatus Azobacteroides pseudotrichonymphae genomovar. CFP2 DNA, complete genome
NC_013162.1:c723242-721720	Capnocytophaga ochracea DSM 7271, complete genome
NC_013062.1:c2238105-2236594	Flavobacteriaceae bacterium 3519-10, complete genome
NC_022124.1:348540-350056	Prevotella sp. oral taxon 299 str. F0039, complete genome
NC_015164.1:4225341-4226859	Bacteroides salanitronis DSM 18170, complete genome
NC_014934.1:3001367-3002873	Cellulophaga algicola DSM 14237, complete sequence
NC_014933.1:c3767577-3766041	Bacteroides helcogenes P 36-108, complete genome
NC_015160.1:c2532779-2531244	Odoribacter splanchnicus DSM 20712, complete genome
NC_015277.1:c6225220-6223711	Sphingobacterium sp. 21, complete genome
NC_015510.1:3841917-3843420	Haliscomenobacter hydrossis DSM 1100, complete sequence
AF323501.1	Salinibacter ruber strain M8 16S ribosomal RNA gene, partial sequence
NC_015966.1:166073-167600	Rhodothermus marinus SG0.5JP17-172, complete genome
NC_015311.1:2480776-2482250	Prevotella denticola F0289, complete genome
NC_015846.1:1076536-1078056	Capnocytophaga canimorsus Cc5, complete genome
NC_015144.1:2060318-2061826	Weeksella virosa DSM 16922, complete genome
AB267809.1	Barnesiella viscericola gene for 16S ribosomal RNA, partial sequence
NC_019904.1:c5537179-5535768	Echinicola vietnamensis DSM 17526, complete genome
NC_015638.1:1891816-1893323	Lacinutrix sp. 5H-3-7-4, complete genome
NC_016940.1:2849575-2851094	Saprospira grandis str. Lewin, complete genome
NC_017569.1:1415650-1417154	Riemerella anatipestifer RA-GD, complete genome
NC_015571.1:2280282-2281801	Porphyromonas gingivalis TDC60 DNA, complete genome
NC_016001.1:c2933996-2932498	Flavobacterium branchiophilum FL-15, complete genome
NC_016510.2:c1803380-1801861	Flavobacterium columnare ATCC 49512, complete genome
JQ352756.1	Flavobacteriaceae bacterium UJ101 16S ribosomal RNA gene, partial sequence
JQ349050.1	Niabella ginsenosidivorans 16S ribosomal RNA gene, partial sequence
NC_018609.1:1129753-1131274	Riemerella anatipestifer RA-CH-1, complete genome
NC_020125.1:c15184-13680	Riemerella anatipestifer RA-CH-2, complete genome
JX847597.1	Mucilaginibacter sp. PAMC 26640 16S ribosomal RNA gene, partial sequence
KF023502.1	Formosa sp. Hel1_33_131 16S ribosomal RNA gene, partial sequence
KF023501.1	Formosa sp. Hel3_A1_48 16S ribosomal RNA gene, partial sequence
NZ_CP007547.1:c3804765-3803245	Elizabethkingia anophelis NUHP1, complete genome
KM198970.1	Hymenobacter sp. APR13 16S ribosomal RNA gene, complete sequence
KF303586.1	Rufibacter sp. DG15C 16S ribosomal RNA gene, partial sequence
KF303587.1	Rufibacter sp. DG31D 16S ribosomal RNA gene, partial sequence
KF360083.1	Hymenobacter sp. DG25A 16S ribosomal RNA gene, partial sequence
KF360084.1	Hymenobacter sp. DG25B 16S ribosomal RNA gene, partial sequence
KF874659.1	Myroides sp. ZB35 16S ribosomal RNA gene, partial sequence
KJ019870.1	Nonlabens sp. MIC269 16S ribosomal RNA gene, partial sequence
KJ606781.1	Hymenobacter sp. PAMC26554 16S ribosomal RNA gene, partial sequence
KJ606783.1	Hymenobacter sp. PAMC26628 16S ribosomal RNA gene, partial sequence
KT951691.1	Sphingobacterium sp. ML3W 16S ribosomal RNA gene, partial sequence
KP208630.1	Chryseobacterium sp. IHB B 17019 16S ribosomal RNA gene, partial sequence
KX022625.1	Maribacter sp. T28 16S ribosomal RNA gene, partial sequence
KX066850.2	Lutibacter sp. LPB0138 16S ribosomal RNA gene, partial sequence
KX066858.2	Tenacibaculum sp. LPB0136 16S ribosomal RNA gene, partial sequence
KX066854.3	Gramella sp. LPB0144 16S ribosomal RNA gene, partial sequence
NC_010830.1:596541-598055	Candidatus Amoebophilus asiaticus 5a2, complete genome
NC_018605.1:c188981-187470	Cardinium endosymbiont cEper1 of Encarsia pergandiella complete genome
BAK24632.1	cationic outer membrane protein OmpH [Porphyromonas gingivalis TDC60]
AAQ65426.1	cationic outer membrane protein OmpH [Porphyromonas gingivalis W83]
AMQ00236.1	Membrane protein [Pedobacter cryoconitis]
ADY33150.1	outer membrane chaperone Skp (OmpH) [Odoribacter splanchnicus DSM 20712]
ALJ24775.1	outer membrane protein [Porphyromonas gingivalis 381]
ALA92819.1	outer membrane protein [Porphyromonas gingivalis AJW4]
ALO29055.1	outer membrane protein [Porphyromonas gingivalis A7A1-28]
AKV63425.1	outer membrane protein [Porphyromonas gingivalis]
ABR45392.1	cationic outer membrane protein OmpH [Parabacteroides distasonis ATCC 8503]
ANU64620.1	hypothetical protein A4V02_13410 [Parabacteroides sp. YL27]
ADQ79591.1	outer membrane chaperone Skp (OmpH) [Paludibacter propionicigenes WB4]
AHF13181.1	membrane protein [Barnesiella viscericola DSM 18177]
ACU58551.1	outer membrane chaperone Skp (OmpH) [Chitinophaga pinensis DSM 2588]
AIZ41523.1	membrane protein [Cellulophaga baltica 18]
AIY13155.1	membrane protein [Cellulophaga baltica NN016038]
ADV49432.1	outer membrane chaperone Skp (OmpH) [Cellulophaga algicola DSM 14237]
AMC10938.1	hypothetical protein Lupro_06615 [Lutibacter sp. LP1]
ALM08966.1	membrane protein [Sediminicola sp. YIK13]
EAR14410.1	outer membrane protein OmpH, putative [Robiginitalea biformata HTCC2501]
AJH13775.1	hypothetical protein MPR_0566 [Myroides profundi]
AJA68901.1	Outer membrane protein (OmpH-like) [Myroides sp. A21]
ALU26162.1	outer membrane chaperone Skp [Myroides odoratimimus]
APA92204.1	outer membrane chaperone Skp [Myroides sp. ZB35]
AEW22277.1	outer membrane protein [Tannerella forsythia 92A2]
BAR48850.1	outer membrane protein [Tannerella forsythia 3313]
BAR51093.1	outer membrane protein [Tannerella forsythia KS16]
AOH40890.1	hypothetical protein BCB71_06960 [Tannerella sp. oral taxon HOT-286]
ALJ59393.1	periplasmic chaperone [Bacteroides cellulosilyticus]
EFC71018.1	hypothetical protein HMPREF0669_00723 (plasmid) [Prevotella sp. oral taxon 299 str. F0039]
AGB28609.1	outer membrane protein [Prevotella dentalis DSM 3688]
ADE81180.1	OmpH/HlpA family protein [Prevotella ruminicola 23]
ALA73328.1	membrane protein [Bacteroides dorei]
AND19226.1	membrane protein [Bacteroides dorei CL03T12C01]
ALJ48435.1	Chaperone protein Skp precursor [Bacteroides ovatus]
SCV07845.1	Chaperone protein Skp2 (OmpH2) [Bacteroides ovatus V975]
ADY36643.1	outer membrane chaperone Skp (OmpH) [Bacteroides salanitronis DSM 18170]
ANU59611.1	hypothetical protein A4V03_00730 [Bacteroides caecimuris]
CEA16766.1	hypothetical protein ING2E5B_2037 [Fermentimonas caenicola]
SCD22135.1	Outer membrane protein (OmpH-like) [Proteiniphilum saccharofermentans]
AHW61378.1	membrane protein [Draconibacterium orientale]
ADZ81689.1	outer membrane chaperone Skp (OmpH) [Sphingobacterium sp. 21]
AFD05693.1	outer membrane protein [Solitalea canadensis DSM 3403]
ACU03209.1	outer membrane chaperone Skp (OmpH) [Pedobacter heparinus DSM 2366]
AEV33738.1	outer membrane protein [Owenweeksia hongkongensis DSM 17368]
AOM78188.1	hypothetical protein BFS30_14025 [Pedobacter steynii]
APU96599.1	hypothetical protein BV902_09775 [Sphingobacterium sp. B29]
ALL08005.1	hypothetical protein AQ505_22485 [Pedobacter sp. PACM 27299]
AIM36244.1	membrane protein [Sphingobacterium sp. ML3W]
ADY52507.1	outer membrane chaperone Skp (OmpH) [Pseudopedobacter saltans DSM 12145]
AMR33903.1	hypothetical protein A0256_21885 [Mucilaginibacter sp. PAMC 26640]
AGA76930.1	outer membrane protein [Echinicola vietnamensis DSM 17526]
AII51566.1	hypothetical protein N008_06165 [Hymenobacter sp. APR13]
ABG60649.1	outer membrane protein, ompH family [Cytophaga hutchinsonii ATCC 33406]
AMM51091.1	membrane protein [Rufibacter sp. DG15C]
AKD02520.1	membrane protein [Pontibacter korlensis]
AEA43115.1	outer membrane chaperone Skp (OmpH) [Fluviicola taffensis DSM 16823]
AHM61745.1	outer membrane chaperone skp (omph) [Flammeovirgaceae bacterium 311]
APG65456.1	hypothetical protein LPB136_08850 [Tenacibaculum sp. LPB0136]
CCB70241.1	Outer membrane chaperone precursor Skp (OmpH) [Flavobacterium branchiophilum FL-15]
ADQ18833.1	outer membrane chaperone Skp (OmpH) [Leadbetterella byssophila DSM 17132]
APA64876.1	membrane protein [Maribacter sp. 1_2014MBL_MicDiv]
AKA35615.1	Outer membrane chaperone Skp (OmpH) [Muricauda lutaonensis]
EAR02161.1	cationic outer membrane protein precursor [Maribacter sp. HTCC2170]
AMD85894.1	hypothetical protein AXF12_10450 [Capnocytophaga haemolytica]
AMX55947.1	molecular chaperone Skp [Elizabethkingia anophelis]
AIL43974.1	Outer membrane protein H precursor [Elizabethkingia anophelis NUHP1]
AKH96507.1	molecular chaperone Skp [Elizabethkingia anophelis FMS-007]
AJW63861.1	Chaperone protein Skp precursor [Elizabethkingia miricola]
AMR29799.1	outer membrane chaperone Skp [Hymenobacter sp. PAMC 26554]
AKU69456.1	hypothetical protein ADJ77_06615 [Prevotella fusca JCM 17724]
AEA21022.1	outer membrane protein [Prevotella denticola F0289]
ADK96435.1	outer membrane protein [Prevotella melaninogenica ATCC 25845]
ANE51636.1	membrane protein [Flavisolibacter sp. LCS9]
AEW02819.1	outer membrane chaperone Skp (OmpH) [Niastella koreensis GR20-10]
APS38437.1	hypothetical protein AO058_05845 [Salegentibacter sp. T436]
ANI90490.1	hypothetical protein A9P82_15055 [Arachidicoccus sp. BS20]
APU68721.1	Outer membrane protein H precursor [Gramella flava JLT2011]
ALM21273.1	membrane protein [Nonlabens sp. MIC269]
APZ46235.1	hypothetical protein BW723_07965 [Polaribacter reichenbachii]
ACT95591.1	outer membrane chaperone Skp (OmpH) [Dyadobacter fermentans DSM 18053]
CAZ96609.1	Outer membrane chaperone Skp (OmpH) family [Zobellia galactanivorans]
EAQ42491.2	outer membrane protein (OmpH-like) [Polaribacter sp. MED152]
APY11285.1	hypothetical protein BWZ22_08525 [Seonamhaeicola sp. S2-3]
AOW18333.1	hypothetical protein LPB03_13120 [Polaribacter sp. LPB0003]
APQ17894.1	hypothetical protein BTR34_11400 [Maribacter sp. T28]
APX99364.1	hypothetical protein BWR22_03250 [Lacinutrix venerupis]
AEE51044.1	outer membrane chaperone Skp (OmpH) [Haliscomenobacter hydrossis DSM 1100]
CCG52372.1	Outer membrane chaperone precursor Skp (OmpH) [Flavobacterium indicum GPTSA100-9 = DSM 17447]
AFL84082.1	outer membrane protein [Belliella baltica DSM 15883]
AGC76754.1	putative outer membrane protein [Nonlabens dokdonensis DSW-6]
ABC44454.1	outer membrane protein OmpH, putative [Salinibacter ruber DSM 13855]
CBH24974.1	Outer membrane chaperone Skp (OmpH) [Salinibacter ruber M8]
AEM70966.1	outer membrane chaperone Skp (OmpH) [Muricauda ruestringensis DSM 13258]
AKD57498.1	outer membrane chaperone Skp [Spirosoma radiotolerans]
AOR28096.1	chaperone protein Skp [Formosa sp. Hel1_33_131]
ADB40416.1	outer membrane chaperone Skp (OmpH) [Spirosoma linguale DSM 74]
AOR26181.1	outer membrane protein H precursor [Formosa sp. Hel3_A1_48]
ACE06161.1	hypothetical protein Aasi_0783 [Candidatus Amoebophilus asiaticus 5a2]
BAR94814.1	outer membrane protein H precursor [Prevotella intermedia]
AFJ09617.1	outer membrane protein, OmpH-like protein [Prevotella intermedia 17]
APW31286.1	hypothetical protein BWX39_00675 [Prevotella intermedia ATCC 25611 = DSM 20706]
ALR32415.1	molecular chaperone Skp [Chryseobacterium sp. IHB B 17019]
AKP71328.1	outer membrane chaperone skp (omph) [Riemerella anatipestifer]
AFD56223.1	outer membrane chaperone skp (omph) [Riemerella anatipestifer ATCC 11845 = DSM 15868]
ADZ12276.1	OmpH1 [Riemerella anatipestifer RA-GD]
AGC39856.1	hypothetical protein G148_0552 [Riemerella anatipestifer RA-CH-2]
AKQ40051.1	molecular chaperone Skp [Riemerella anatipestifer Yb2]
AEW85734.1	OmpH family outer membrane protein [Flavobacterium columnare ATCC 49512]
AOW20642.1	hypothetical protein LPB138_08120 [Lutibacter sp. LPB0138]
AFR35432.1	hypothetical protein B739_0831 [Riemerella anatipestifer RA-CH-1]
AIH02462.1	outer membrane chaperone skp (omph) [Riemerella anatipestifer CH3]
APT22013.1	hypothetical protein BU993_04805 [Flavobacterium columnare]
AGY54183.1	Outer Membrane Chaperone Skp [Bacteroidales bacterium CF]
AOC94055.1	Outer membrane protein (OmpH-like) [Flavobacterium johnsoniae]
ANF53146.1	molecular chaperone Skp [Chryseobacterium sp. IHB B 10212]
BAP33660.1	outer membrane chaperone skp [Chryseobacterium sp. StRB126]
ANQ47561.1	Outer membrane protein, ompH family [Flammeovirga sp. MY04]
ABQ04721.1	outer membrane chaperone Skp (OmpH) [Flavobacterium johnsoniae UW101]
AKK74803.1	molecular chaperone Skp [Chryseobacterium gallinarum]
AFM03968.1	outer membrane protein [Bernardetia litoralis DSM 6794]
EAP87951.1	cationic outer membrane protein precursor [Croceibacter atlanticus HTCC2559]
AEK23026.1	Outer membrane protein, ompH family [Capnocytophaga canimorsus Cc5]
ALC98020.1	hypothetical protein AM608_10435 [Capnocytophaga sp. oral taxon 323]
BAG83837.1	OmpH-like outer membrane protein [Candidatus Azobacteroides pseudotrichonymphae genomovar. CFP2]
AFU68543.1	outer membrane periplasmic chaperone, OmpH family [Psychroflexus torquis ATCC 700755]
AFL80346.1	outer membrane protein [Aequorivita sublithincola DSM 14238]
AOZ99548.1	hypothetical protein BIW12_08885 [Flavobacterium sp. PK15]
AEH01257.1	outer membrane chaperone Skp (OmpH) [Lacinutrix sp. 5H-3-7-4]
BAO75088.1	outer membrane protein H precursor [Winogradskyella sp. PG-2]
ANH82658.1	hypothetical protein A8C56_18255 [Niabella ginsenosidivorans]
AHF16561.1	membrane protein [Niabella soli DSM 19437]
APG60373.1	hypothetical protein LPB144_08120 [Gramella sp. LPB0144]
AOW09194.1	hypothetical protein EM308_06555 [Flavobacterium sp. EM1308]
CAL65199.1	OmpH family outer membrane protein [Gramella forsetii KT0803]
EAQ39337.1	outer membrane protein (OmpH-like) [Dokdonia sp. MED134]
ANH59239.1	Outer membrane protein (OmpH-like) [Dokdonia donghaensis DSW-1]
AEE18820.1	outer membrane chaperone Skp (OmpH) [Dokdonia sp. 4H-3-7-5]
AIN74155.1	membrane protein [Flavobacterium psychrophilum FPG3]
ALU74121.1	hypothetical protein AUW17_02020 [Tenacibaculum dicentrarchi]
AIG30842.1	membrane protein [Flavobacterium psychrophilum]
AIN71047.1	membrane protein [Flavobacterium psychrophilum FPG101]
CAL44159.1	Outer membrane chaperone precursor Skp (OmpH) [Flavobacterium psychrophilum JIP02/86]
APY08778.1	hypothetical protein BWZ20_10885 [Winogradskyella sp. J14-2]
APD06459.1	hypothetical protein UJ101_00928 [Flavobacteriaceae bacterium UJ101]
AMJ67983.1	hypothetical protein AXW84_02445 [Hymenobacter sp. PAMC 26628]
AFL78271.1	outer membrane protein [Alistipes finegoldii DSM 17242]
ALW84029.1	hypothetical protein AUC43_02290 [Hymenobacter sp. DG5B]
AFC23244.1	outer membrane chaperone Skp (OmpH) [Saprospira grandis str. Lewin]
AEI48772.1	outer membrane chaperone Skp (OmpH) [Runella slithyformis DSM 19594]
ANW97144.1	hypothetical protein AXE80_12985 [Wenyingzhuangia fucanilytica]
APU10643.1	hypothetical protein A5M85_10235 [Cellulophaga lytica]
ADY29769.1	outer membrane chaperone Skp (OmpH) [Cellulophaga lytica DSM 7489]
ALO16572.1	Cationic 19 kDa outer membrane protein [bacterium L21-Spi-D4]
ACU06672.1	Outer membrane protein H precursor [Flavobacteriaceae bacterium 3519-10]
AEE13107.1	outer membrane chaperone Skp (OmpH) [Porphyromonas asaccharolytica DSM 20707]
SCM55622.1	Chaperone protein Skp [Petrimonas mucosa]
ALD21874.1	hypothetical protein AM218_12495 [Hymenobacter sp. DG25A]
AIZ63017.1	membrane protein [Hymenobacter sp. DG25B]
ACY48841.1	outer membrane chaperone Skp (OmpH) [Rhodothermus marinus DSM 4252]
ALJ01284.1	hypothetical protein DC20_07000 [Rufibacter tibetensis]
AEN72839.1	outer membrane chaperone Skp (OmpH) [Rhodothermus marinus SG0.5JP17-172]
AFK02933.1	outer membrane chaperone Skp (OmpH) [Emticicia oligotrophica DSM 17448]
AMS25836.1	hypothetical protein AEM51_01265 [Bacteroidetes bacterium UKL13-3]
ALO49755.1	hypothetical protein AS203_00270 [Prevotella enoeca]
ADV42353.1	outer membrane chaperone Skp (OmpH) [Bacteroides helcogenes P 36-108]
AHJ95942.1	hypothetical protein Hsw_0347 [Hymenobacter swuensis DY53]
AMQ55063.1	hypothetical protein AO498_01575 [Algoriphagus sp. M8-2]
AEL25607.1	outer membrane chaperone Skp (OmpH) [Cyclobacterium marinum DSM 745]
AKP51200.1	Outer membrane chaperone Skp (OmpH) [Cyclobacterium amurskyense]
AFL96872.1	outer membrane protein [Ornithobacterium rhinotracheale DSM 15997]
AIP99041.1	molecular chaperone Skp [Ornithobacterium rhinotracheale ORT-UMN 88]
AKQ46854.1	membrane protein [Rufibacter sp. DG31D]
ADR21761.1	outer membrane chaperone Skp (OmpH) [Marivirga tractuosa DSM 4126]
AJR03197.1	membrane protein [Siansivirga zeaxanthinifaciens CC-SAMT-1]
ADX67815.1	outer membrane chaperone Skp (OmpH) [Weeksella virosa DSM 16922]
ACU92905.1	outer membrane chaperone Skp (OmpH) [Capnocytophaga ochracea DSM 7271]
CCM09964.1	Putative uncharacterized protein [Cardinium endosymbiont cEper1 of Encarsia pergandiella]
ALJ06846.1	hypothetical protein APS56_13120 [Algibacter alginolytica]
ADF50974.1	OmpH family outer membrane protein [Zunongwangia profunda SM-A87]
AKV64131.1	outer membrane protein/peptidoglycan-associated (lipo)protein [Porphyromonas gingivalis]
AAQ66173.1	OmpA family protein [Porphyromonas gingivalis W83]
BAG33815.1	putative OmpA family protein [Porphyromonas gingivalis ATCC 33277]
BAK25137.1	putative OmpA family protein [Porphyromonas gingivalis TDC60]
ALJ25739.1	outer membrane protein/peptidoglycan-associated (lipo)protein [Porphyromonas gingivalis 381]
ALA93449.1	outer membrane protein/peptidoglycan-associated (lipo)protein [Porphyromonas gingivalis AJW4]
ALO29605.1	outer membrane protein/peptidoglycan-associated (lipo)protein [Porphyromonas gingivalis A7A1-28]
SCD21712.1	hypothetical protein PSM36_2918 [Proteiniphilum saccharofermentans]
ANU64491.1	hypothetical protein A4V02_12680 [Parabacteroides sp. YL27]
CAL66808.1	OmpA/MotB family outer membrane protein [Gramella forsetii KT0803]
APS39982.1	flagellar motor protein MotB [Salegentibacter sp. T436]
AEE19880.1	OmpA/MotB domain protein [Dokdonia sp. 4H-3-7-5]
ADR23296.1	OmpA/MotB domain protein [Marivirga tractuosa DSM 4126]
CAZ94709.1	OmpA-like outer membrane protein [Zobellia galactanivorans]
APA65351.1	flagellar motor protein MotB [Maribacter sp. 1_2014MBL_MicDiv]
APQ19230.1	flagellar motor protein MotB [Maribacter sp. T28]
AIY14093.1	flagellar motor protein MotB [Cellulophaga baltica NN016038]
AEK22184.1	Hypothetical protein Ccan_00620 [Capnocytophaga canimorsus Cc5]
ABR45445.1	outer membrane protein OmpA family protein [Parabacteroides distasonis ATCC 8503]
AEE13610.1	OmpA/MotB domain protein [Porphyromonas asaccharolytica DSM 20707]
AHF12397.1	membrane protein [Barnesiella viscericola DSM 18177]
SCM59223.1	Outer membrane porin F [Petrimonas mucosa]
ALJ58814.1	Photosystem I P700 chlorophyll a apoprotein A2 [Bacteroides cellulosilyticus]
CEA16524.1	hypothetical protein ING2E5B_1780 [Fermentimonas caenicola]
AKU70060.1	hypothetical protein ADJ77_09545 [Prevotella fusca JCM 17724]
AEA21949.1	OmpA family protein [Prevotella denticola F0289]
APW32748.1	hypothetical protein BWX39_05060 [Prevotella intermedia ATCC 25611 = DSM 20706]
BAR95898.1	outer membrane lipoprotein omp16 precursor [Prevotella intermedia]
AFJ09630.1	OmpA family protein [Prevotella intermedia 17]
ALO49503.1	hypothetical protein AS203_10745 [Prevotella enoeca]
AHW60133.1	membrane protein [Draconibacterium orientale]
AMS25917.1	hypothetical protein AEM51_01720 [Bacteroidetes bacterium UKL13-3]
ADY31858.1	OmpA/MotB domain protein [Odoribacter splanchnicus DSM 20712]
APU67606.1	Outer membrane lipoprotein omp16 precursor [Gramella flava JLT2011]
APG59406.1	flagellar motor protein MotB [Gramella sp. LPB0144]
ALJ01300.1	hypothetical protein DC20_07895 [Rufibacter tibetensis]
ANH60248.1	Photosystem I P700 chlorophyll a apoprotein A2 [Dokdonia donghaensis DSW-1]
EAQ38040.1	OmpA family protein [Dokdonia sp. MED134]
ADZ78651.1	OmpA/MotB domain protein [Sphingobacterium sp. 21]
ALJ03945.1	hypothetical protein APS56_01720 [Algibacter alginolytica]
AMM52802.1	hypothetical protein TH61_06845 [Rufibacter sp. DG15C]
AOW09162.1	flagellar motor protein MotB [Flavobacterium sp. EM1308]
AHJ99899.1	hypothetical protein Hsw_4304 [Hymenobacter swuensis DY53]
APY07017.1	hypothetical protein BWZ20_01300 [Winogradskyella sp. J14-2]
AFL84030.1	outer membrane protein/peptidoglycan-associated (lipo)protein [Belliella baltica DSM 15883]
AMQ54966.1	hypothetical protein AO498_01090 [Algoriphagus sp. M8-2]
BAO77151.1	outer membrane lipoprotein omp16 precursor [Winogradskyella sp. PG-2]
ABG58977.1	peptidoglycan-associated lipoprotein, OmpA family [Cytophaga hutchinsonii ATCC 33406]
AJR04125.1	flagellar motor protein MotB [Siansivirga zeaxanthinifaciens CC-SAMT-1]
CCB68564.1	Probable outer membrane protein precursor, OmpA family [Flavobacterium branchiophilum FL-15]
ABQ04679.1	OmpA/MotB domain protein [Flavobacterium johnsoniae UW101]
ACU93244.1	OmpA/MotB domain protein [Capnocytophaga ochracea DSM 7271]
ALC96328.1	flagellar motor protein MotB [Capnocytophaga sp. oral taxon 323]
AOW22129.1	hypothetical protein LPB138_14250 [Lutibacter sp. LPB0138]
ALU74758.1	hypothetical protein AUW17_05500 [Tenacibaculum dicentrarchi]
AOC96138.1	Outer membrane porin F precursor [Flavobacterium johnsoniae]
AFU68413.1	outer membrane lipoprotein [Psychroflexus torquis ATCC 700755]
APZ45667.1	cell envelope biogenesis protein OmpA [Polaribacter reichenbachii]
AOR26577.1	cell envelope biogenesis protein OmpA [Formosa sp. Hel3_A1_48]
ALM06545.1	flagellar motor protein MotB [Sediminicola sp. YIK13]
ACE06635.1	hypothetical protein Aasi_1325 [Candidatus Amoebophilus asiaticus 5a2]
ANE53185.1	flagellar motor protein MotB [Flavisolibacter sp. LCS9]
AOR28600.1	cell envelope biogenesis protein OmpA [Formosa sp. Hel1_33_131]
AEW20983.1	OmpA family protein [Tannerella forsythia 92A2]
AOH41916.1	hypothetical protein BCB71_06285 [Tannerella sp. oral taxon HOT-286]
BAR48705.1	OmpA family protein [Tannerella forsythia 3313]
BAR51220.1	OmpA family protein [Tannerella forsythia KS16]
ADE81936.1	OmpA family protein [Prevotella ruminicola 23]
EFC70079.1	hypothetical protein HMPREF0669_01904 [Prevotella sp. oral taxon 299 str. F0039]
ALO15901.1	Outer membrane protein II* [bacterium L21-Spi-D4]
AKQ47793.1	hypothetical protein TH63_17285 [Rufibacter sp. DG31D]
ADB41175.1	OmpA/MotB domain protein [Spirosoma linguale DSM 74]
EAP87988.1	OmpA family protein [Croceibacter atlanticus HTCC2559]
ALD22100.1	hypothetical protein AM218_13880 [Hymenobacter sp. DG25A]
AIN73559.1	flagellar motor protein MotB [Flavobacterium psychrophilum FPG3]
AIJ38577.1	Outer membrane protein [Flavobacterium psychrophilum]
CAL43256.1	Probable outer membrane protein precursor, OmpA family [Flavobacterium psychrophilum JIP02/86]
AIN70823.1	flagellar motor protein MotB [Flavobacterium psychrophilum FPG101]
APA94020.1	flagellar motor protein MotB [Myroides sp. ZB35]
AJH15924.1	flagellar motor protein MotB [Myroides profundi]
ALU28242.1	flagellar motor protein MotB [Myroides odoratimimus]
AJA70816.1	WD40-like Beta Propeller Repeat/OmpA family/Carboxypeptidase regulatory-like domain [Myroides sp. A21]
ADY50767.1	OmpA/MotB domain protein [Pseudopedobacter saltans DSM 12145]
ALW84340.1	hypothetical protein AUC43_04090 [Hymenobacter sp. DG5B]
ADQ17240.1	OmpA/MotB domain protein [Leadbetterella byssophila DSM 17132]
AOZ98047.1	flagellar motor protein MotB [Flavobacterium sp. PK15]
AMJ67416.1	hypothetical protein AXW84_19800 [Hymenobacter sp. PAMC 26628]
AKA35853.1	OmpA/MotB domain protein [Muricauda lutaonensis]
AFC23282.1	OmpA/MotB domain protein [Saprospira grandis str. Lewin]
AMC12247.1	flagellar motor protein MotB [Lutibacter sp. LP1]
ADQ79013.1	OmpA/MotB domain protein [Paludibacter propionicigenes WB4]
AGB28985.1	outer membrane protein/peptidoglycan-associated (lipo)protein [Prevotella dentalis DSM 3688]
AEV32425.1	outer membrane protein/peptidoglycan-associated (lipo)protein [Owenweeksia hongkongensis DSM 17368]
AII51884.1	hypothetical protein N008_07805 [Hymenobacter sp. APR13]
ACT95540.1	OmpA/MotB domain protein [Dyadobacter fermentans DSM 18053]
AEE54031.1	OmpA/MotB domain protein [Haliscomenobacter hydrossis DSM 1100]
ACU04271.1	OmpA/MotB domain protein [Pedobacter heparinus DSM 2366]
ADK96649.1	OmpA family protein [Prevotella melaninogenica ATCC 25845]
ALM21000.1	OmpA family protein [Nonlabens sp. MIC269]
ANQ49974.1	Outer membrane protein, peptidoglycan-associated lipoprotein [Flammeovirga sp. MY04]
CCG53127.1	Probable outer membrane protein precursor, OmpA family [Flavobacterium indicum GPTSA100-9 = DSM 17447]
AFL80255.1	outer membrane protein/peptidoglycan-associated (lipo)protein [Aequorivita sublithincola DSM 14238]
APU11131.1	flagellar motor protein MotB [Cellulophaga lytica]
ADY30251.1	OmpA/MotB domain protein [Cellulophaga lytica DSM 7489]
AEM72044.1	OmpA/MotB domain protein [Muricauda ruestringensis DSM 13258]
AMR25847.1	hypothetical protein A0257_01220 [Hymenobacter sp. PAMC 26554]
AFK02332.1	OmpA/MotB domain protein [Emticicia oligotrophica DSM 17448]
AOM80289.1	hypothetical protein BFS30_25875 [Pedobacter steynii]
AFM05280.1	outer membrane protein/peptidoglycan-associated (lipo)protein [Bernardetia litoralis DSM 6794]
APG64221.1	hypothetical protein LPB136_02045 [Tenacibaculum sp. LPB0136]
AEW00209.1	OmpA/MotB domain protein [Niastella koreensis GR20-10]
AKD58801.1	flagellar motor protein MotB [Spirosoma radiotolerans]
AHM61453.1	ompa/motb domain protein [Flammeovirgaceae bacterium 311]
AGC76428.1	OmpA family protein [Nonlabens dokdonensis DSW-6]
AKD05579.1	hypothetical protein PKOR_07500 [Pontibacter korlensis]
ADF53394.1	OmpA/MotB domain-containing protein [Zunongwangia profunda SM-A87]
AEA45082.1	OmpA/MotB domain protein [Fluviicola taffensis DSM 16823]
APY12264.1	flagellar motor protein MotB [Seonamhaeicola sp. S2-3]
AND64285.1	flagellar motor protein MotB [Flavobacterium columnare]
AEW86878.1	OmpA family outer membrane protein [Flavobacterium columnare ATCC 49512]
ACU58045.1	OmpA/MotB domain protein [Chitinophaga pinensis DSM 2588]
AMR33378.1	hypothetical protein A0256_19110 [Mucilaginibacter sp. PAMC 26640]
AEI48068.1	OmpA/MotB domain protein [Runella slithyformis DSM 19594]
ADV48904.1	OmpA/MotB domain protein [Cellulophaga algicola DSM 14237]
AIZ65274.1	hypothetical protein PK28_14705 [Hymenobacter sp. DG25B]
AMD84852.1	flagellar motor protein MotB [Capnocytophaga haemolytica]
AGA77009.1	outer membrane protein/peptidoglycan-associated (lipo)protein [Echinicola vietnamensis DSM 17526]
AKP51483.1	OmpA/MotB domain protein [Cyclobacterium amurskyense]
AEL25862.1	OmpA/MotB domain protein [Cyclobacterium marinum DSM 745]
AMP98226.1	membrane protein [Pedobacter cryoconitis]
ALL05883.1	hypothetical protein AQ505_10465 [Pedobacter sp. PACM 27299]
EAQ42644.1	OmpA family protein [Polaribacter sp. MED152]
AIZ41087.1	cell envelope biogenesis protein OmpA [Cellulophaga baltica 18]
AEH02497.1	OmpA/MotB domain protein [Lacinutrix sp. 5H-3-7-4]
APX99968.1	hypothetical protein BWR22_06475 [Lacinutrix venerupis]
EAR02786.1	OmpA family protein [Maribacter sp. HTCC2170]
EAR14168.1	OmpA family protein [Robiginitalea biformata HTCC2501]
AKV64601.1	outer membrane receptor protein [Porphyromonas gingivalis]
AAQ65726.1	hypothetical protein PG_0534 [Porphyromonas gingivalis W83]
BAG33956.1	conserved hypothetical protein [Porphyromonas gingivalis ATCC 33277]
BAK25801.1	hypothetical protein PGTDC60_1652 [Porphyromonas gingivalis TDC60]
ALJ25865.1	outer membrane receptor protein [Porphyromonas gingivalis 381]
ALA93924.1	outer membrane receptor protein [Porphyromonas gingivalis AJW4]
ADX68570.1	TonB-dependent receptor, plug [Weeksella virosa DSM 16922]
ABR41955.1	conserved hypothetical protein [Parabacteroides distasonis ATCC 8503]
EFC71805.2	hypothetical protein HMPREF0669_00477 (plasmid) [Prevotella sp. oral taxon 299 str. F0039]
BAR96704.1	putative ferric aerobactin receptor [Prevotella intermedia]
ALO48516.1	TonB-dependent receptor [Prevotella enoeca]
AFJ07471.1	TonB-dependent receptor plug domain protein [Prevotella intermedia 17]
AOH41685.1	TonB-dependent receptor [Tannerella sp. oral taxon HOT-286]
AHF13255.1	TonB-dependent receptor [Barnesiella viscericola DSM 18177]
APW33124.1	TonB-dependent receptor [Prevotella intermedia ATCC 25611 = DSM 20706]
ALJ04235.1	TonB-dependent receptor [Algibacter alginolytica]
BAO77108.1	putative ferric aerobactin receptor [Winogradskyella sp. PG-2]
AJR03976.1	TonB-dependent receptor [Siansivirga zeaxanthinifaciens CC-SAMT-1]
CCB70480.1	Probable outer membrane protein precursor [Flavobacterium branchiophilum FL-15]
AFU69907.1	TonB-dependent outer membrane receptor protein [Psychroflexus torquis ATCC 700755]
APG64719.1	TonB-dependent receptor [Tenacibaculum sp. LPB0136]
AEE49728.1	TonB-dependent receptor [Haliscomenobacter hydrossis DSM 1100]
AEV96748.1	TonB-dependent receptor [Niastella koreensis GR20-10]
AKQ45578.1	colicin receptor [Rufibacter sp. DG31D]
AKA34054.1	TonB-dependent receptor [Muricauda lutaonensis]
ABG58876.1	conserved hypothetical protein [Cytophaga hutchinsonii ATCC 33406]
ACU04064.1	TonB-dependent receptor [Pedobacter heparinus DSM 2366]
ADR20490.1	hypothetical protein Ftrac_0485 [Marivirga tractuosa DSM 4126]
CBH25677.1	Conserved hypothetical protein containing TonB-dependent receptor domain [Salinibacter ruber M8]
ALJ61647.1	TonB-dependent Receptor Plug Domain protein [Bacteroides cellulosilyticus]
ADK97130.1	TonB-dependent receptor [Prevotella melaninogenica ATCC 25845]
AEA22203.1	TonB-dependent receptor [Prevotella denticola F0289]
AGB27872.1	outer membrane receptor protein [Prevotella dentalis DSM 3688]
AKU70413.1	TonB-dependent receptor [Prevotella fusca JCM 17724]
AFL82060.1	outer membrane receptor protein [Aequorivita sublithincola DSM 14238]
AMS27450.1	hypothetical protein AEM51_10895 [Bacteroidetes bacterium UKL13-3]
APZ48154.1	TonB-dependent receptor [Polaribacter reichenbachii]
AOW21972.1	TonB-dependent receptor [Lutibacter sp. LPB0138]
APY06970.1	TonB-dependent receptor [Winogradskyella sp. J14-2]
AEV32276.1	outer membrane receptor for ferrienterochelin and colicins [Owenweeksia hongkongensis DSM 17368]
EAQ41556.1	TonB dependent/ligand-gated channel [Polaribacter sp. MED152]
EAP88426.1	hypothetical protein CA2559_06685 [Croceibacter atlanticus HTCC2559]
ALU76099.1	TonB-dependent receptor [Tenacibaculum dicentrarchi]
AEH02539.1	TonB-dependent receptor plug [Lacinutrix sp. 5H-3-7-4]
AMC09978.1	TonB-dependent receptor [Lutibacter sp. LP1]
ABQ03156.1	TonB-dependent receptor, plug [Flavobacterium johnsoniae UW101]
AGC77268.1	putative outer membrane protein [Nonlabens dokdonensis DSW-6]
CCG53792.1	Probable outer membrane protein precursor [Flavobacterium indicum GPTSA100-9 = DSM 17447]
AIG29941.1	TonB-dependent receptor [Flavobacterium psychrophilum]
CAL43229.1	Probable outer membrane protein precursor [Flavobacterium psychrophilum JIP02/86]
AIN73586.1	TonB-dependent receptor [Flavobacterium psychrophilum FPG3]
AIN72211.1	TonB-dependent receptor [Flavobacterium psychrophilum FPG101]
AOW16309.1	TonB-dependent receptor [Polaribacter sp. LPB0003]
APA65389.1	TonB-dependent receptor [Maribacter sp. 1_2014MBL_MicDiv]
ACU07752.1	TonB-dependent receptor, plug [Flavobacteriaceae bacterium 3519-10]
CAZ97279.1	TonB-dependent Receptor [Zobellia galactanivorans]
ALM09204.1	TonB-dependent receptor [Sediminicola sp. YIK13]
ALJ00621.1	colicin receptor [Rufibacter tibetensis]
AKD04813.1	colicin receptor [Pontibacter korlensis]
ADY51570.1	TonB-dependent receptor [Pseudopedobacter saltans DSM 12145]
AIY13567.1	TonB-dependent receptor [Cellulophaga baltica NN016038]
AIZ41937.1	TonB-dependent receptor [Cellulophaga baltica 18]
AFC25956.1	TonB-dependent receptor plug [Saprospira grandis str. Lewin]
AEA44653.1	TonB-dependent receptor plug [Fluviicola taffensis DSM 16823]
AMM52200.1	hypothetical protein TH61_14785 [Rufibacter sp. DG15C]
AIZ63949.1	colicin receptor [Hymenobacter sp. DG25B]
ALD20906.1	colicin receptor [Hymenobacter sp. DG25A]
AHJ97768.1	hypothetical protein Hsw_2173 [Hymenobacter swuensis DY53]
ACY49151.1	TonB-dependent receptor [Rhodothermus marinus DSM 4252]
AEN74169.1	TonB-dependent receptor [Rhodothermus marinus SG0.5JP17-172]
AEW20350.1	TonB-dependent receptor [Tannerella forsythia 92A2]
AHW61283.1	TonB-dependent receptor [Draconibacterium orientale]
BAR50321.1	TonB-dependent receptor [Tannerella forsythia 3313]
BAR53149.1	TonB-dependent receptor [Tannerella forsythia KS16]
ANU62720.1	TonB-dependent receptor [Parabacteroides sp. YL27]
APY12847.1	TonB-dependent receptor [Seonamhaeicola sp. S2-3]
AOR29584.1	TonB-dependent receptor [Formosa sp. Hel1_33_131]
APY00090.1	TonB-dependent receptor [Lacinutrix venerupis]
ANH60529.1	TonB-dependent Receptor Plug Domain protein [Dokdonia donghaensis DSW-1]
APD05677.1	hypothetical protein UJ101_00124 [Flavobacteriaceae bacterium UJ101]
EAQ37883.1	TonB dependent/ligand-gated channel [Dokdonia sp. MED134]
AEE20110.1	hypothetical protein Krodi_2128 [Dokdonia sp. 4H-3-7-5]
AOW11147.1	TonB-dependent receptor [Flavobacterium sp. EM1308]
AOC95498.1	TonB-dependent Receptor Plug Domain protein [Flavobacterium johnsoniae]
AHM58844.1	TonB-dependent receptor family protein [Flammeovirgaceae bacterium 311]
ANW97478.1	TonB-dependent receptor [Wenyingzhuangia fucanilytica]
APQ18404.1	TonB-dependent receptor [Maribacter sp. T28]
AND63259.1	TonB-dependent receptor [Flavobacterium columnare]
APA00830.1	TonB-dependent receptor [Flavobacterium sp. PK15]
EAR00930.1	hypothetical protein FB2170_09171 [Maribacter sp. HTCC2170]
ANI90748.1	TonB-dependent receptor [Arachidicoccus sp. BS20]
ADV49900.1	TonB-dependent receptor plug [Cellulophaga algicola DSM 14237]
AII53889.1	hypothetical protein N008_18135 [Hymenobacter sp. APR13]
ADE81667.1	conserved hypothetical protein [Prevotella ruminicola 23]
ADQ79215.1	TonB-dependent receptor plug [Paludibacter propionicigenes WB4]
AEE12893.1	TonB-dependent receptor [Porphyromonas asaccharolytica DSM 20707]
ALO17098.1	TonB-linked outer membrane protein, SusC/RagA family [bacterium L21-Spi-D4]
ANE50309.1	TonB-dependent receptor [Flavisolibacter sp. LCS9]
ALM21583.1	TonB-dependent receptor [Nonlabens sp. MIC269]
AOM80424.1	TonB-dependent receptor [Pedobacter steynii]
AMJ68109.1	colicin receptor [Hymenobacter sp. PAMC 26628]
AFM02963.1	TonB-dependent receptor family protein [Bernardetia litoralis DSM 6794]
ALW87376.1	colicin receptor [Hymenobacter sp. DG5B]
AMR26347.1	colicin receptor [Hymenobacter sp. PAMC 26554]
ABC43598.1	TonB-dependent receptor domain protein [Salinibacter ruber DSM 13855]
AOR26960.1	TonB-dependent receptor [Formosa sp. Hel3_A1_48]
AFR36743.1	hypothetical protein B739_2161 [Riemerella anatipestifer RA-CH-1]
AIH01543.1	tonb-dependent receptor plug [Riemerella anatipestifer CH3]
AKP72182.1	tonb-dependent receptor plug [Riemerella anatipestifer]
AFD55104.1	tonb-dependent receptor plug [Riemerella anatipestifer ATCC 11845 = DSM 15868]
ADZ11448.1	putative TonB-dependent outer membrane receptor [Riemerella anatipestifer RA-GD]
AGC40972.1	hypothetical protein G148_1668 [Riemerella anatipestifer RA-CH-2]
AKQ40652.1	TonB-dependent receptor [Riemerella anatipestifer Yb2]
AFL96546.1	outer membrane receptor protein [Ornithobacterium rhinotracheale DSM 15997]
AIQ00774.1	TonB-denpendent receptor [Ornithobacterium rhinotracheale ORT-UMN 88]
ADY36763.1	TonB-dependent receptor plug [Bacteroides salanitronis DSM 18170]
ALR30402.1	TonB-dependent receptor [Chryseobacterium sp. IHB B 17019]
BAP31746.1	tonb-dependent receptor plug [Chryseobacterium sp. StRB126]
ANF52480.1	TonB-dependent receptor [Chryseobacterium sp. IHB B 10212]
AKK74282.1	TonB-dependent receptor [Chryseobacterium gallinarum]
AFL77010.1	outer membrane cobalamin receptor protein [Alistipes finegoldii DSM 17242]
ALA92816.1	hypothetical protein PGJ_00001780 [Porphyromonas gingivalis AJW4]
BAK24629.1	hypothetical protein PGTDC60_0460 [Porphyromonas gingivalis TDC60]
ALJ24772.1	hypothetical protein PGF_00002930 [Porphyromonas gingivalis 381]
BAG32816.1	conserved hypothetical protein [Porphyromonas gingivalis ATCC 33277]
ALO29052.1	hypothetical protein PGS_00002790 [Porphyromonas gingivalis A7A1-28]
AKV63422.1	hypothetical protein PGA7_00001790 [Porphyromonas gingivalis]
AAQ65423.1	hypothetical protein PG_0189 [Porphyromonas gingivalis W83]
AFM05361.1	hypothetical protein Fleli_3020 [Bernardetia litoralis DSM 6794]
AMQ55060.1	hypothetical protein AO498_01560 [Algoriphagus sp. M8-2]
SCD22139.1	Outer membrane protein beta-barrel domain [Proteiniphilum saccharofermentans]
ALJ59390.1	hypothetical protein BcellWH2_02149 [Bacteroides cellulosilyticus]
CEA16763.1	hypothetical protein ING2E5B_2034 [Fermentimonas caenicola]
AKP51197.1	hypothetical protein CA2015_1764 [Cyclobacterium amurskyense]
ACT94826.1	conserved hypothetical protein [Dyadobacter fermentans DSM 18053]
AGB28606.1	hypothetical protein Prede_1284 [Prevotella dentalis DSM 3688]
BAR94811.1	hypothetical protein PI172_0083 [Prevotella intermedia]
AFJ08348.1	outer membrane protein beta-barrel domain protein [Prevotella intermedia 17]
APW31283.1	hypothetical protein BWX39_00660 [Prevotella intermedia ATCC 25611 = DSM 20706]
BAR48847.1	hypothetical protein TF3313_1321 [Tannerella forsythia 3313]
BAR51096.1	hypothetical protein TFKS16_0803 [Tannerella forsythia KS16]
AEW19783.1	hypothetical protein BFO_1443 [Tannerella forsythia 92A2]
AOH40893.1	hypothetical protein BCB71_06975 [Tannerella sp. oral taxon HOT-286]
AEA20883.1	hypothetical protein HMPREF9137_0560 [Prevotella denticola F0289]
ADE83222.1	conserved hypothetical protein [Prevotella ruminicola 23]
SCM55630.1	putative protein {ECO:0000313|EMBL:EGK00251,1} [Petrimonas mucosa]
ADQ79588.1	hypothetical protein Palpr_1442 [Paludibacter propionicigenes WB4]
ABR45389.1	conserved hypothetical protein [Parabacteroides distasonis ATCC 8503]
ANU64617.1	hypothetical protein A4V02_13395 [Parabacteroides sp. YL27]
ANO47330.1	hypothetical protein Pf1_01873 [Flavobacterium columnare]
AEW85731.1	hypothetical protein FCOL_04500 [Flavobacterium columnare ATCC 49512]
EFC71021.1	hypothetical protein HMPREF0669_00726 (plasmid) [Prevotella sp. oral taxon 299 str. F0039]
AEE13104.1	hypothetical protein Poras_1162 [Porphyromonas asaccharolytica DSM 20707]
AHF13178.1	hypothetical protein BARVI_10975 [Barnesiella viscericola DSM 18177]
AGA76933.1	hypothetical protein Echvi_0655 [Echinicola vietnamensis DSM 17526]
AKU69459.1	hypothetical protein ADJ77_06630 [Prevotella fusca JCM 17724]
ADK95303.1	hypothetical protein HMPREF0659_A6368 [Prevotella melaninogenica ATCC 25845]
ALO47733.1	hypothetical protein AS203_00285 [Prevotella enoeca]
AEL25604.1	hypothetical protein Cycma_1852 [Cyclobacterium marinum DSM 745]
ANE51639.1	hypothetical protein SY85_15165 [Flavisolibacter sp. LCS9]
AOR28093.1	hypothetical protein FORMB_10450 [Formosa sp. Hel1_33_131]
AOR26178.1	inorganic polyphosphate kinase [Formosa sp. Hel3_A1_48]
AMM51088.1	hypothetical protein TH61_07710 [Rufibacter sp. DG15C]
AKD58369.1	hypothetical protein SD10_06535 [Spirosoma radiotolerans]
AMQ00239.1	hypothetical protein AY601_3371 [Pedobacter cryoconitis]
ACU03206.1	hypothetical protein Phep_0984 [Pedobacter heparinus DSM 2366]
AMR33920.1	hypothetical protein A0256_21970 [Mucilaginibacter sp. PAMC 26640]
ALU74124.1	hypothetical protein AUW17_02035 [Tenacibaculum dicentrarchi]
ABG60646.1	conserved hypothetical protein [Cytophaga hutchinsonii ATCC 33406]
ADY52510.1	hypothetical protein Pedsa_1957 [Pseudopedobacter saltans DSM 12145]
ADB36723.1	hypothetical protein Slin_0660 [Spirosoma linguale DSM 74]
AFL84085.1	hypothetical protein Belba_1470 [Belliella baltica DSM 15883]
ALW84032.1	hypothetical protein AUC43_02305 [Hymenobacter sp. DG5B]
ALO16569.1	hypothetical protein L21SP5_02949 [bacterium L21-Spi-D4]
AEI50334.1	OmpA/MotB domain protein [Runella slithyformis DSM 19594]
AEA43901.1	hypothetical protein Fluta_1914 [Fluviicola taffensis DSM 16823]
AKV64808.1	hypothetical protein PGA7_00016160 [Porphyromonas gingivalis]
AAQ65507.1	lipoprotein, putative [Porphyromonas gingivalis W83]
BAG34195.1	Por secretion system protein porK/gldK [Porphyromonas gingivalis ATCC 33277]
BAK25550.1	putative lipoprotein [Porphyromonas gingivalis TDC60]
ALJ26080.1	hypothetical protein PGF_00016600 [Porphyromonas gingivalis 381]
ALA94151.1	hypothetical protein PGJ_00015610 [Porphyromonas gingivalis AJW4]
ALO30273.1	hypothetical protein PGS_00015940 [Porphyromonas gingivalis A7A1-28]
AEW20979.1	putative gliding motility-associated lipoprotein GldK [Tannerella forsythia 92A2]
BAR48723.1	putative gliding motility-associated lipoprotein [Tannerella forsythia 3313]
BAR51200.1	putative gliding motility-associated lipoprotein GldK [Tannerella forsythia KS16]
ADE81622.1	putative lipoprotein [Prevotella ruminicola 23]
AOH40372.1	gliding motility-associated lipoprotein GldK [Tannerella sp. oral taxon HOT-286]
AOW18464.1	gliding motility lipoprotein GldK [Polaribacter sp. LPB0003]
CCB69976.1	Gliding motility lipoprotein precursor GldK [Flavobacterium branchiophilum FL-15]
AOZ99736.1	gliding motility lipoprotein GldK [Flavobacterium sp. PK15]
EFC70478.1	gliding motility-associated lipoprotein GldK [Prevotella sp. oral taxon 299 str. F0039]
AEA20663.1	putative gliding motility-associated lipoprotein GldK [Prevotella denticola F0289]
AKU69184.1	gliding motility-associated lipoprotein GldK [Prevotella fusca JCM 17724]
ALO16076.1	Serine/threonine-protein kinase pkn1 [bacterium L21-Spi-D4]
AMS27389.1	hypothetical protein AEM51_10545 [Bacteroidetes bacterium UKL13-3]
AEK22283.1	C-alpha-formylglycine-generating enzyme 2 [Capnocytophaga canimorsus Cc5]
APU95309.1	hypothetical protein BV902_02315 [Sphingobacterium sp. B29]
ANH82202.1	hypothetical protein A8C56_15625 [Niabella ginsenosidivorans]
BAR96559.1	GldJ [Prevotella intermedia]
AFJ09594.1	formylglycine-generating sulfatase enzyme [Prevotella intermedia 17]
ALJ60613.1	Serine/threonine-protein kinase pkn1 [Bacteroides cellulosilyticus]
AHF12557.1	hypothetical protein BARVI_07025 [Barnesiella viscericola DSM 18177]
AGB27568.1	hypothetical protein Prede_0179 [Prevotella dentalis DSM 3688]
APW31215.1	gliding motility-associated lipoprotein GldK [Prevotella intermedia ATCC 25611 = DSM 20706]
SCD19412.1	gliding motility-associated lipoprotein GldK [Proteiniphilum saccharofermentans]
AHW59463.1	hypothetical protein FH5T_07270 [Draconibacterium orientale]
AEV33761.1	hypothetical protein Oweho_2801 [Owenweeksia hongkongensis DSM 17368]
AOE52262.1	gliding motility protein Gldk [Flavobacterium psychrophilum]
APZ45200.1	gliding motility lipoprotein GldK [Polaribacter reichenbachii]
AOW21678.1	gliding motility lipoprotein GldK [Lutibacter sp. LPB0138]
ALL08340.1	GldJ [Pedobacter sp. PACM 27299]
ALU75623.1	gliding motility lipoprotein GldK [Tenacibaculum dicentrarchi]
EAQ40615.1	gliding motility protein GldK [Polaribacter sp. MED152]
AFL80308.1	protein involved in gliding motility GldK [Aequorivita sublithincola DSM 14238]
AOM77785.1	gliding motility-associated lipoprotein [Pedobacter steynii]
AFU67945.1	gliding motility associated lipoprotein GldK [Psychroflexus torquis ATCC 700755]
APY10297.1	gliding motility lipoprotein GldK [Seonamhaeicola sp. S2-3]
ALM21820.1	gliding motility protein Gldk [Nonlabens sp. MIC269]
APY07803.1	gliding motility lipoprotein GldK [Winogradskyella sp. J14-2]
ADX67270.1	gliding motility-associated lipoprotein GldK [Weeksella virosa DSM 16922]
ABR45028.1	conserved hypothetical protein [Parabacteroides distasonis ATCC 8503]
ADK95933.1	putative gliding motility-associated lipoprotein GldK [Prevotella melaninogenica ATCC 25845]
AEE13518.1	Sulphatase-modifying factor protein [Porphyromonas asaccharolytica DSM 20707]
ANU63169.1	gliding motility-associated lipoprotein GldK [Parabacteroides sp. YL27]
ADZ81732.1	Sulphatase-modifying factor protein [Sphingobacterium sp. 21]
AEE49344.1	Sulphatase-modifying factor protein [Haliscomenobacter hydrossis DSM 1100]
ADV48211.1	protein involved in gliding motility GldK [Cellulophaga algicola DSM 14237]
AIZ40504.1	gliding motility protein Gldk [Cellulophaga baltica 18]
AIY12139.1	gliding motility protein Gldk [Cellulophaga baltica NN016038]
EAP87234.1	lipoprotein, putative [Croceibacter atlanticus HTCC2559]
APG65195.1	gliding motility lipoprotein GldK [Tenacibaculum sp. LPB0136]
ABQ04885.1	GldK [Flavobacterium johnsoniae UW101]
AOC93911.1	Serine/threonine-protein kinase pkn1 [Flavobacterium johnsoniae]
AGC75991.1	gliding motility protein [Nonlabens dokdonensis DSW-6]
AOR26642.1	gliding motility protein GldK [Formosa sp. Hel3_A1_48]
CCG54177.1	Gliding motility lipoprotein precursor GldK [Flavobacterium indicum GPTSA100-9 = DSM 17447]
ADQ80635.1	protein of unknown function DUF323 [Paludibacter propionicigenes WB4]
ACU57981.1	protein of unknown function DUF323 [Chitinophaga pinensis DSM 2588]
AMC11829.1	gliding motility lipoprotein GldK [Lutibacter sp. LP1]
AMR30228.1	gliding motility-associated lipoprotein [Mucilaginibacter sp. PAMC 26640]
ADF54453.1	gliding motility protein GldK [Zunongwangia profunda SM-A87]
AEA44274.1	Sulphatase-modifying factor protein [Fluviicola taffensis DSM 16823]
EAQ39191.1	gliding motility protein GldK [Dokdonia sp. MED134]
AEE19665.1	gliding motility-associated lipoprotein GldK [Dokdonia sp. 4H-3-7-5]
ANH61818.1	Serine/threonine-protein kinase pkn1 [Dokdonia donghaensis DSW-1]
CAL67960.1	gliding motility protein GldK [Gramella forsetii KT0803]
APU67824.1	GldJ [Gramella flava JLT2011]
AMQ00662.1	Lipoprotein [Pedobacter cryoconitis]
APS38497.1	gliding motility lipoprotein GldK [Salegentibacter sp. T436]
APG61017.1	gliding motility lipoprotein GldK [Gramella sp. LPB0144]
AFL97608.1	protein involved in gliding motility GldK [Ornithobacterium rhinotracheale DSM 15997]
AIP98882.1	gliding motility protein Gldk [Ornithobacterium rhinotracheale ORT-UMN 88]
AKP71941.1	Sulphatase-modifying factor [Riemerella anatipestifer]
ADZ11707.1	Sulphatase-modifying factor [Riemerella anatipestifer RA-GD]
AGC41247.1	hypothetical protein G148_1943 [Riemerella anatipestifer RA-CH-2]
AKQ40396.1	gliding motility protein Gldk [Riemerella anatipestifer Yb2]
AFD56810.1	protein involved in gliding motility gldk [Riemerella anatipestifer ATCC 11845 = DSM 15868]
AIH01830.1	GldJ [Riemerella anatipestifer CH3]
AFR34829.1	hypothetical protein B739_0222 [Riemerella anatipestifer RA-CH-1]
ALO49494.1	gliding motility-associated lipoprotein GldK [Prevotella enoeca]
SCM59452.1	Sulfatase-modifying factor 2 [Petrimonas mucosa]
CEA15048.1	hypothetical protein ING2E5B_0279 [Fermentimonas caenicola]
AEM69892.1	gliding motility-associated lipoprotein GldK [Muricauda ruestringensis DSM 13258]
ALM08018.1	gliding motility protein Gldk [Sediminicola sp. YIK13]
EAR17029.1	lipoprotein, putative [Robiginitalea biformata HTCC2501]
AKA34601.1	Gliding motility-associated lipoprotein GldK [Muricauda lutaonensis]
CAZ95208.1	Gliding motility membrane lipoprotein [Zobellia galactanivorans]
EAR00567.1	lipoprotein, putative [Maribacter sp. HTCC2170]
APA63808.1	gliding motility protein Gldk [Maribacter sp. 1_2014MBL_MicDiv]
APQ16849.1	gliding motility lipoprotein GldK [Maribacter sp. T28]
ADY28591.1	gliding motility-associated lipoprotein GldK [Cellulophaga lytica DSM 7489]
APU09503.1	gliding motility lipoprotein GldK [Cellulophaga lytica]
ACU92365.1	protein involved in gliding motility GldK [Capnocytophaga ochracea DSM 7271]
ALC97514.1	gliding motility protein Gldk [Capnocytophaga sp. oral taxon 323]
AOR28682.1	gliding motility protein GldK [Formosa sp. Hel1_33_131]
APY01070.1	gliding motility lipoprotein GldK [Lacinutrix venerupis]
BAO76338.1	gliding motility protein GldJ [Winogradskyella sp. PG-2]
AND64462.1	gliding motility lipoprotein GldK [Flavobacterium columnare]
AEW87127.1	gliding motility protein GldK [Flavobacterium columnare ATCC 49512]
AOW09317.1	gliding motility lipoprotein GldK [Flavobacterium sp. EM1308]
ALU25217.1	gliding motility lipoprotein GldK [Myroides odoratimimus]
APA91263.1	gliding motility lipoprotein GldK [Myroides sp. ZB35]
AJA67940.1	gliding motility-associated lipoprotein GldK [Myroides sp. A21]
AJH16396.1	gliding motility protein Gldk [Myroides profundi]
ALR29189.1	gliding motility lipoprotein GldK [Chryseobacterium sp. IHB B 17019]
AFD08330.1	hypothetical protein Solca_3323 [Solitalea canadensis DSM 3403]
AFC24325.1	gliding motility protein GldK [Saprospira grandis str. Lewin]
AJR03352.1	gliding motility protein Gldk [Siansivirga zeaxanthinifaciens CC-SAMT-1]
AEH01388.1	gliding motility-associated lipoprotein GldK [Lacinutrix sp. 5H-3-7-4]
ALJ06779.1	gliding motility lipoprotein GldK [Algibacter alginolytica]
ACU06947.1	GldJ [Flavobacteriaceae bacterium 3519-10]
ANF49807.1	gliding motility lipoprotein GldK [Chryseobacterium sp. IHB B 10212]
APD06505.1	hypothetical protein UJ101_00974 [Flavobacteriaceae bacterium UJ101]
AKK73268.1	gliding motility protein Gldk [Chryseobacterium gallinarum]
ANE53628.1	GldJ [Flavisolibacter sp. LCS9]
AEW03076.1	Sulphatase-modifying factor protein [Niastella koreensis GR20-10]
ADY53067.1	protein involved in gliding motility GldK [Pseudopedobacter saltans DSM 12145]
ANI90483.1	hypothetical protein A9P82_15020 [Arachidicoccus sp. BS20]
BAP30049.1	gliding motility protein gldk [Chryseobacterium sp. StRB126]
ABG57463.1	gliding motility-related protein [Cytophaga hutchinsonii ATCC 33406]
AFM04962.1	hypothetical protein Fleli_2599 [Bernardetia litoralis DSM 6794]
AHJ95868.1	gliding motility-like protein [Hymenobacter swuensis DY53]
ACU02607.1	protein of unknown function DUF323 [Pedobacter heparinus DSM 2366]
ALW84284.1	gliding motility lipoprotein GldK [Hymenobacter sp. DG5B]
AMM50648.1	gliding motility protein [Rufibacter sp. DG15C]
ALD21933.1	gliding motility protein [Hymenobacter sp. DG25A]
AIZ62963.1	gliding motility protein [Hymenobacter sp. DG25B]
AKD02677.1	gliding motility protein [Pontibacter korlensis]
ACP20875.1	hypothetical protein Aasi_1513 [Candidatus Amoebophilus asiaticus 5a2]
CAL44037.1	Gliding motility lipoprotein precursor GldK [Flavobacterium psychrophilum JIP02/86]
AIN74271.1	gliding motility protein Gldk [Flavobacterium psychrophilum FPG3]
AIN71166.1	gliding motility protein Gldk [Flavobacterium psychrophilum FPG101]
AFL83323.1	gliding motility-associated lipoprotein GldK [Belliella baltica DSM 15883]
AMJ67352.1	gliding motility lipoprotein GldK [Hymenobacter sp. PAMC 26628]
ADQ17431.1	protein of unknown function DUF323 [Leadbetterella byssophila DSM 17132]
AKQ47231.1	gliding motility protein [Rufibacter sp. DG31D]
ALI99190.1	gliding motility lipoprotein GldK [Rufibacter tibetensis]
ADY33174.1	gliding motility-associated lipoprotein GldJ [Odoribacter splanchnicus DSM 20712]
AGA76901.1	gliding motility-associated lipoprotein GldK [Echinicola vietnamensis DSM 17526]
AMQ55032.1	gliding motility lipoprotein GldK [Algoriphagus sp. M8-2]
AEL24921.1	gliding motility-associated lipoprotein GldK [Cyclobacterium marinum DSM 745]
AKP50509.1	GldJ [Cyclobacterium amurskyense]
AMR27752.1	gliding motility lipoprotein GldK [Hymenobacter sp. PAMC 26554]
ANW97060.1	gliding motility lipoprotein GldK [Wenyingzhuangia fucanilytica]
ACT94130.1	protein of unknown function DUF323 [Dyadobacter fermentans DSM 18053]
AHM61046.1	gliding motility-associated lipoprotein gldk [Flammeovirgaceae bacterium 311]
AEI49880.1	Sulphatase-modifying factor protein [Runella slithyformis DSM 19594]
ADR22534.1	gliding motility-associated lipoprotein GldK [Marivirga tractuosa DSM 4126]
Porphyromonas_gingivalis_W83
Porphyromonas_gingivalis_381
Porphyromonas_gingivalis
Porphyromonas_gingivalis_ATCC_33277
Porphyromonas_gingivalis_A7A1-28
Porphyromonas_gingivalis_AJW4
Porphyromonas_gingivalis_TDC60
Tannerella_forsythia_3313
Tannerella_forsythia_92A2
Muribaculum_intestinale
Prevotella_fusca_JCM_17724
Prevotella_denticola_F0289
Barnesiella_viscericola_DSM_18177
Proteiniphilum_saccharofermentans
Prevotella_intermedia
Prevotella_intermedia_ATCC_25611
Prevotella_intermedia_17
Prevotella_sp._oral_taxon_299_str._F0039
Porphyromonas_asaccharolytica_DSM_20707
Prevotella_dentalis_DSM_3688
Parabacteroides_distasonis_ATCC_8503
Prevotella_melaninogenica_ATCC_25845
Prevotella_enoeca
Tannerella_sp._oral_taxon_HOT-286
Bacteroides_cellulosilyticus
Draconibacterium_orientale
Petrimonas_mucosa
Paludibacter_propionicigenes_WB4
Weeksella_virosa_DSM_16922
Pedobacter_heparinus_DSM_2366
Pedobacter_cryoconitis
Dokdonia_sp._4H-3-7-5
Owenweeksia_hongkongensis_DSM_17368
Pontibacter_korlensis
Hymenobacter_swuensis_DY53
Zunongwangia_profunda_SM-A87
Lutibacter_sp._LPB0138
Ornithobacterium_rhinotracheale_DSM_15997
Ornithobacterium_rhinotracheale_ORT-UMN_88
Lacinutrix_sp._5H-3-7-4
Lacinutrix_venerupis
Seonamhaeicola_sp._S2-3
Pseudopedobacter_saltans_DSM_12145
Prevotella_ruminicola_23
Cytophaga_hutchinsonii_ATCC_33406
Bacteroidetes_bacterium_UKL13-3
Emticicia_oligotrophica_DSM_17448
Niastella_koreensis_GR20-10
Flavisolibacter_sp._LCS9
Spirosoma_linguale_DSM_74
Spirosoma_radiotolerans
Fluviicola_taffensis_DSM_16823
Marivirga_tractuosa_DSM_4126
Sphingobacterium_sp._B29
Sphingobacterium_sp._ML3W
Leadbetterella_byssophila_DSM_17132
Bernardetia_litoralis_DSM_6794
Flavobacterium_columnare
Flavobacterium_columnare_ATCC_49512
Runella_slithyformis_DSM_19594
Flavobacterium_sp._EM1308
Flavobacteriaceae_bacterium_3519-10
Chryseobacterium_sp._IHB_B_17019
Riemerella_anatipestifer_CH3
Riemerella_anatipestifer_Yb2
Riemerella_anatipestifer
Riemerella_anatipestifer_RA-CH-2
Riemerella_anatipestifer_ATCC_11845
Riemerella_anatipestifer_RA-GD
Chryseobacterium_gallinarum
Riemerella_anatipestifer_RA-CH-1
Chryseobacterium_sp._IHB_B_10212
Solitalea_canadensis_DSM_3403
Myroides_profundi
Chitinophaga_pinensis_DSM_2588
Myroides_odoratimimus
Myroides_sp._ZB35
Myroides_sp._A21
Flavobacterium_psychrophilum_JIP02
Flavobacterium_psychrophilum_FPG3
Flavobacterium_psychrophilum_FPG101
Capnocytophaga_canimorsus_Cc5
Sphingobacterium_sp._21
Pedobacter_steynii
Pedobacter_sp._PACM_27299
Flammeovirga_sp._MY04
Candidatus_Amoebophilus_asiaticus_5a2
Chryseobacterium_sp._StRB126
Belliella_baltica_DSM_15883
Mucilaginibacter_sp._PAMC_26640
Rufibacter_sp._DG31D
Flammeovirgaceae_bacterium_311
Algoriphagus_sp._M8-2
Rufibacter_sp._DG15C
Rufibacter_tibetensis
Hymenobacter_sp._PAMC_26628
Cyclobacterium_marinum_DSM_745
Hymenobacter_sp._DG25B
Hymenobacter_sp._PAMC_26554
Cyclobacterium_amurskyense
Hymenobacter_sp._APR13
Echinicola_vietnamensis_DSM_17526
Hymenobacter_sp._DG5B
Hymenobacter_sp._DG25A
Capnocytophaga_haemolytica
Capnocytophaga_sp._oral_taxon_323
Capnocytophaga_ochracea_DSM_7271
Dyadobacter_fermentans_DSM_18053
Lutibacter_sp._LP1
Polaribacter_sp._LPB0003
Maribacter_sp._T28
Tenacibaculum_sp._LPB0136
Muricauda_lutaonensis
Cellulophaga_lytica
Cellulophaga_lytica_DSM_7489
Sediminicola_sp._YIK13
Maribacter_sp._1_2014MBL_MicDiv
Polaribacter_reichenbachii
Flavobacterium_sp._PK15
Flavobacterium_branchiophilum_FL-15
Polaribacter_sp._MED152
Flavobacterium_johnsoniae
Flavobacterium_johnsoniae_UW101
ALO30271.1	gliding motility-associated protein GldM [Porphyromonas gingivalis A7A1-28]
ALA94149.1	gliding motility-associated protein GldM [Porphyromonas gingivalis AJW4]
AKV64806.1	gliding motility-associated protein GldM [Porphyromonas gingivalis]
AAQ65509.1	hypothetical protein PG_0290 [Porphyromonas gingivalis W83]
BAK25552.1	hypothetical protein PGTDC60_1402 [Porphyromonas gingivalis TDC60]
ALJ26078.1	gliding motility-associated protein GldM [Porphyromonas gingivalis 381]
BAG34193.1	Por secretion system protein porM/gldM [Porphyromonas gingivalis ATCC 33277]
AHF12559.1	gliding motility-associated protein GldM [Barnesiella viscericola DSM 18177]
CEA15046.1	hypothetical protein ING2E5B_0277 [Fermentimonas caenicola]
ALJ60615.1	hypothetical protein BcellWH2_03382 [Bacteroides cellulosilyticus]
ABR45026.1	conserved hypothetical protein [Parabacteroides distasonis ATCC 8503]
AEE13520.1	gliding motility-associated protein GldM [Porphyromonas asaccharolytica DSM 20707]
SCD19410.1	gliding motility-associated protein GldM [Proteiniphilum saccharofermentans]
SCM59454.1	Gliding motility-associated protein GldM {ECO:0000313|EMBL:EJZ62078,1} [Petrimonas mucosa]
ADE81159.1	conserved hypothetical protein [Prevotella ruminicola 23]
AOH40373.1	gliding motility protein GldM [Tannerella sp. oral taxon HOT-286]
BAR48725.1	gliding motility-associated protein [Tannerella forsythia 3313]
BAR51198.1	gliding motility-associated protein GldM [Tannerella forsythia KS16]
AEW22244.1	gliding motility-associated protein GldM [Tannerella forsythia 92A2]
EFC70480.1	gliding motility-associated protein GldM [Prevotella sp. oral taxon 299 str. F0039]
ADK96144.1	gliding motility-associated protein GldM [Prevotella melaninogenica ATCC 25845]
AKU69182.1	gliding motility-associated protein GldM [Prevotella fusca JCM 17724]
AGB27570.1	gliding motility-associated protein GldM [Prevotella dentalis DSM 3688]
AEA20972.1	gliding motility-associated protein GldM [Prevotella denticola F0289]
ALO49981.1	gliding motility protein GldM [Prevotella enoeca]
AOM77787.1	gliding motility protein GldM [Pedobacter steynii]
ANU63171.1	gliding motility protein GldM [Parabacteroides sp. YL27]
BAR96561.1	hypothetical protein PI172_1833 [Prevotella intermedia]
APW31213.1	gliding motility protein GldM [Prevotella intermedia ATCC 25611 = DSM 20706]
AFJ08031.1	gliding motility-associated protein GldM [Prevotella intermedia 17]
ALO16078.1	gliding motility-associated protein GldM [bacterium L21-Spi-D4]
ADZ78571.1	gliding motility-associated protein GldM [Sphingobacterium sp. 21]
ACU57978.1	hypothetical protein Cpin_0480 [Chitinophaga pinensis DSM 2588]
ACU02609.1	hypothetical protein Phep_0385 [Pedobacter heparinus DSM 2366]
AIM39089.1	gliding motility-associated protein GldM [Sphingobacterium sp. ML3W]
AMR30226.1	gliding motility protein GldM [Mucilaginibacter sp. PAMC 26640]
APU95346.1	gliding motility protein GldM [Sphingobacterium sp. B29]
ALC97512.1	gliding motility protein GldM [Capnocytophaga sp. oral taxon 323]
AFL97610.1	gliding motility-associated protein GldM [Ornithobacterium rhinotracheale DSM 15997]
AIQ00333.1	hypothetical protein Q785_02740 [Ornithobacterium rhinotracheale ORT-UMN 88]
ADQ80637.1	gliding motility-associated protein GldM [Paludibacter propionicigenes WB4]
ALL08338.1	gliding motility protein GldM [Pedobacter sp. PACM 27299]
AFD08328.1	gliding motility-associated protein GldM [Solitalea canadensis DSM 3403]
AMQ00660.1	Gliding motility protein GldM [Pedobacter cryoconitis]
AEW03078.1	gliding motility-associated protein GldM [Niastella koreensis GR20-10]
ANE52492.1	hypothetical protein SY85_20425 [Flavisolibacter sp. LCS9]
AEE49342.1	gliding motility-associated protein GldM [Haliscomenobacter hydrossis DSM 1100]
AFC24321.1	gliding motility protein GldM [Saprospira grandis str. Lewin]
CAL44035.1	Gliding motility transmembrane protein GldM [Flavobacterium psychrophilum JIP02/86]
AIN71168.1	gliding motility protein GldM [Flavobacterium psychrophilum FPG101]
AIN74273.1	gliding motility protein GldM [Flavobacterium psychrophilum FPG3]
AHW61734.1	hypothetical protein FH5T_07280 [Draconibacterium orientale]
ADY53065.1	gliding motility-associated protein GldM [Pseudopedobacter saltans DSM 12145]
AMS27387.1	hypothetical protein AEM51_10535 [Bacteroidetes bacterium UKL13-3]
ANH82200.1	gliding motility protein GldM [Niabella ginsenosidivorans]
APU67822.1	hypothetical protein GRFL_1098 [Gramella flava JLT2011]
AEA44279.1	hypothetical protein Fluta_2293 [Fluviicola taffensis DSM 16823]
AEV33759.1	gliding motility-associated protein GldM [Owenweeksia hongkongensis DSM 17368]
CAL67958.1	gliding motility protein GldM [Gramella forsetii KT0803]
APG61019.1	gliding motility protein GldM [Gramella sp. LPB0144]
AEM69890.1	gliding motility-associated protein GldM [Muricauda ruestringensis DSM 13258]
APS38499.1	gliding motility protein GldM [Salegentibacter sp. T436]
ALM08016.1	gliding motility protein GldM [Sediminicola sp. YIK13]
AJH16394.1	gliding motility protein GldM [Myroides profundi]
ALU25215.1	gliding motility protein GldM [Myroides odoratimimus]
APA91261.1	gliding motility protein GldM [Myroides sp. ZB35]
AJA67938.1	gliding motility-associated protein GldM [Myroides sp. A21]
AKQ40398.1	gliding motility protein GldM [Riemerella anatipestifer Yb2]
AKP71943.1	gliding motility protein gldm [Riemerella anatipestifer]
AGC41245.1	hypothetical protein G148_1941 [Riemerella anatipestifer RA-CH-2]
AFD56812.1	protein involved in gliding motility gldm [Riemerella anatipestifer ATCC 11845 = DSM 15868]
ADZ11705.1	GldM [Riemerella anatipestifer RA-GD]
APY07801.1	gliding motility protein GldM [Winogradskyella sp. J14-2]
ABQ04887.1	GldM [Flavobacterium johnsoniae UW101]
AOC93909.1	hypothetical protein BB050_00767 [Flavobacterium johnsoniae]
AOE52260.1	gliding motility protein GldM [Flavobacterium psychrophilum]
AFR34827.1	hypothetical protein B739_0220 [Riemerella anatipestifer RA-CH-1]
ANI90668.1	gliding motility protein GldM [Arachidicoccus sp. BS20]
APY10295.1	gliding motility protein GldM [Seonamhaeicola sp. S2-3]
AKA34599.1	gliding motility protein GldM [Muricauda lutaonensis]
APQ16847.1	gliding motility protein GldM [Maribacter sp. T28]
AJR03354.1	gliding motility protein GldM [Siansivirga zeaxanthinifaciens CC-SAMT-1]
AFL80306.1	protein involved in gliding motility GldM [Aequorivita sublithincola DSM 14238]
AOW09319.1	gliding motility protein GldM [Flavobacterium sp. EM1308]
ALJ04917.1	gliding motility protein GldM [Algibacter alginolytica]
AIZ40502.1	gliding motility protein GldM [Cellulophaga baltica 18]
AIY12137.1	gliding motility protein GldM [Cellulophaga baltica NN016038]
EAP87236.1	hypothetical protein CA2559_00735 [Croceibacter atlanticus HTCC2559]
ALU75621.1	gliding motility protein GldM [Tenacibaculum dicentrarchi]
ANH61816.1	hypothetical protein I597_2927 [Dokdonia donghaensis DSW-1]
EAQ39193.1	gliding motility protein GldM [Dokdonia sp. MED134]
AIH01828.1	protein involved in gliding motility gldm [Riemerella anatipestifer CH3]
AOZ99738.1	gliding motility protein GldM [Flavobacterium sp. PK15]
ADF54451.1	conserved hypothetical protein [Zunongwangia profunda SM-A87]
EAR00569.1	hypothetical protein FB2170_08689 [Maribacter sp. HTCC2170]
EAR17031.1	hypothetical protein RB2501_09015 [Robiginitalea biformata HTCC2501]
BAO76340.1	hypothetical protein WPG_2110 [Winogradskyella sp. PG-2]
APA63806.1	gliding motility protein GldM [Maribacter sp. 1_2014MBL_MicDiv]
CAZ95206.1	Gliding motility protein [Zobellia galactanivorans]
APU09501.1	gliding motility protein GldM [Cellulophaga lytica]
ADY28589.1	gliding motility-associated protein GldM [Cellulophaga lytica DSM 7489]
CCG54179.1	Gliding motility transmembrane protein GldM [Flavobacterium indicum GPTSA100-9 = DSM 17447]
APY01068.1	gliding motility protein GldM [Lacinutrix venerupis]
CCB69974.1	Gliding motility transmembrane protein GldM [Flavobacterium branchiophilum FL-15]
AEE19667.1	gliding motility-associated protein GldM [Dokdonia sp. 4H-3-7-5]
ANW97058.1	hypothetical protein AXE80_12515 [Wenyingzhuangia fucanilytica]
AEH01390.1	gliding motility-associated protein GldM [Lacinutrix sp. 5H-3-7-4]
ANQ50637.1	Gliding motility-related protein [Flammeovirga sp. MY04]
AKK73270.1	gliding motility protein GldM [Chryseobacterium gallinarum]
AOR28684.1	gliding motility protein GldM [Formosa sp. Hel1_33_131]
AMJ67350.1	gliding motility protein GldM [Hymenobacter sp. PAMC 26628]
ALM21822.1	gliding motility protein GldM [Nonlabens sp. MIC269]
ACU06949.1	hypothetical protein FIC_00490 [Flavobacteriaceae bacterium 3519-10]
AFM04960.1	gliding motility-associated protein GldM [Bernardetia litoralis DSM 6794]
AFL83321.1	gliding motility-associated protein GldM [Belliella baltica DSM 15883]
AEK22285.1	Hypothetical protein Ccan_01630 [Capnocytophaga canimorsus Cc5]
ADX67268.1	hypothetical protein Weevi_0549 [Weeksella virosa DSM 16922]
AFU67943.1	gliding motility associated protein GldM [Psychroflexus torquis ATCC 700755]
AEL24919.1	gliding motility-associated protein GldM [Cyclobacterium marinum DSM 745]
AKP50507.1	Gliding motility-related protein [Cyclobacterium amurskyense]
AOW21680.1	gliding motility protein GldM [Lutibacter sp. LPB0138]
AMD84447.1	gliding motility protein GldM [Capnocytophaga haemolytica]
APD06503.1	hypothetical protein UJ101_00972 [Flavobacteriaceae bacterium UJ101]
EAQ40617.3	gliding motility protein GldM [Polaribacter sp. MED152]
AMC11831.1	gliding motility protein GldM [Lutibacter sp. LP1]
APZ45198.1	gliding motility protein GldM [Polaribacter reichenbachii]
AOW18466.1	gliding motility protein GldM [Polaribacter sp. LPB0003]
ADV48209.1	protein involved in gliding motility GldM [Cellulophaga algicola DSM 14237]
ACU92363.1	gliding motility protein GldM [Capnocytophaga ochracea DSM 7271]
AND64464.1	gliding motility protein GldM [Flavobacterium columnare]
AEW87125.1	gliding motility protein GldM [Flavobacterium columnare ATCC 49512]
AFK02447.1	gliding motility-associated protein GldM [Emticicia oligotrophica DSM 17448]
APG65193.1	gliding motility protein GldM [Tenacibaculum sp. LPB0136]
ABG57465.1	gliding motility-related protein [Cytophaga hutchinsonii ATCC 33406]
ALW84282.1	gliding motility protein GldM [Hymenobacter sp. DG5B]
AIZ62965.1	gliding motility-like protein [Hymenobacter sp. DG25B]
AOR26644.1	gliding motility protein GldM [Formosa sp. Hel3_A1_48]
AKD02675.1	gliding motility-like protein [Pontibacter korlensis]
AHJ95870.1	gliding motility-like protein [Hymenobacter swuensis DY53]
ALD21931.1	gliding motility-like protein [Hymenobacter sp. DG25A]
ANF49805.1	gliding motility protein GldM [Chryseobacterium sp. IHB B 10212]
AGA76899.1	gliding motility-associated protein GldM [Echinicola vietnamensis DSM 17526]
AMR27750.1	gliding motility protein GldM [Hymenobacter sp. PAMC 26554]
AKD56407.1	gliding motility protein [Spirosoma radiotolerans]
AMQ55030.1	gliding motility protein GldM [Algoriphagus sp. M8-2]
BAP30051.1	gliding motility-associated protein GldM [Chryseobacterium sp. StRB126]
AII51661.1	hypothetical protein N008_06645 [Hymenobacter sp. APR13]
AGC75989.1	gliding motility protein [Nonlabens dokdonensis DSW-6]
ACT94132.1	gliding motility-related protein [Dyadobacter fermentans DSM 18053]
ALR29191.1	gliding motility protein GldM [Chryseobacterium sp. IHB B 17019]
ADR22536.1	gliding motility-associated protein GldM [Marivirga tractuosa DSM 4126]
ACE05696.1	hypothetical protein Aasi_0253 [Candidatus Amoebophilus asiaticus 5a2]
ADQ17429.1	gliding motility-associated protein GldM [Leadbetterella byssophila DSM 17132]
AHM61044.1	hypothetical protein D770_13950 [Flammeovirgaceae bacterium 311]
AEI49882.1	gliding motility-associated protein GldM [Runella slithyformis DSM 19594]
ALI99192.1	gliding motility protein GldM [Rufibacter tibetensis]
AMM52754.1	gliding motility-like protein [Rufibacter sp. DG15C]
ADB39234.1	gliding motility-associated protein GldM [Spirosoma linguale DSM 74]
AKQ47233.1	gliding motility-like protein [Rufibacter sp. DG31D]
AAQ65510.1	hypothetical protein PG_0291 [Porphyromonas gingivalis W83]
AKV64805.1	gliding motility associated protein GldN [Porphyromonas gingivalis]
ALA94148.1	gliding motility associated protein GldN [Porphyromonas gingivalis AJW4]
BAK25553.1	hypothetical protein PGTDC60_1403 [Porphyromonas gingivalis TDC60]
ALJ26077.1	gliding motility associated protein GldN [Porphyromonas gingivalis 381]
BAG34192.1	Por secretion system protein porN/gldN [Porphyromonas gingivalis ATCC 33277]
ALO30270.1	gliding motility associated protein GldN [Porphyromonas gingivalis A7A1-28]
BAR51197.1	gliding motility-associated protein GldN [Tannerella forsythia KS16]
BAR48726.1	gliding motility-associated protein [Tannerella forsythia 3313]
AEW20566.1	gliding motility-associated protein GldN [Tannerella forsythia 92A2]
BAR96562.1	hypothetical protein PI172_1834 [Prevotella intermedia]
AFJ09359.1	gliding motility-associated protein GldN [Prevotella intermedia 17]
APW31212.1	gliding motility protein GldN [Prevotella intermedia ATCC 25611 = DSM 20706]
ALO49492.1	gliding motility protein GldN [Prevotella enoeca]
AOH40374.1	gliding motility protein GldN [Tannerella sp. oral taxon HOT-286]
ANU63172.1	hypothetical protein A4V02_05190 [Parabacteroides sp. YL27]
AEE13521.1	gliding motility associated protein GldN [Porphyromonas asaccharolytica DSM 20707]
AHF12560.1	gliding motility protein GldN [Barnesiella viscericola DSM 18177]
AGB27571.1	gliding motility associated protein GldN [Prevotella dentalis DSM 3688]
AKU69181.1	gliding motility protein GldN [Prevotella fusca JCM 17724]
ADK95476.1	gliding motility-associated protein GldN [Prevotella melaninogenica ATCC 25845]
AEA21199.1	gliding motility-associated protein GldN [Prevotella denticola F0289]
AEV33758.1	gliding motility associated protein GldN [Owenweeksia hongkongensis DSM 17368]
AEE49341.1	gliding motility associated protein GldN [Haliscomenobacter hydrossis DSM 1100]
CEA15045.1	putative secreted protein [Fermentimonas caenicola]
ADQ80638.1	gliding motility associated protein GldN [Paludibacter propionicigenes WB4]
ACU02610.1	hypothetical protein Phep_0386 [Pedobacter heparinus DSM 2366]
AOW09320.1	gliding motility protein GldN [Flavobacterium sp. EM1308]
APY07800.1	gliding motility protein GldN [Winogradskyella sp. J14-2]
ALM21823.1	gliding motility protein GldO [Nonlabens sp. MIC269]
APY01067.1	gliding motility protein GldN [Lacinutrix venerupis]
ABR45025.1	conserved hypothetical protein [Parabacteroides distasonis ATCC 8503]
SCM59455.1	Gliding motility-associated protein GldN {ECO:0000313|EMBL:EHG98370,1} [Petrimonas mucosa]
ADY28588.1	gliding motility associated protein GldN [Cellulophaga lytica DSM 7489]
APU09500.1	gliding motility protein GldN [Cellulophaga lytica]
APS38500.1	gliding motility protein GldN [Salegentibacter sp. T436]
AOW21681.1	gliding motility protein GldN [Lutibacter sp. LPB0138]
ALM08015.1	gliding motility protein GldO [Sediminicola sp. YIK13]
EAR00570.1	hypothetical protein FB2170_08694 [Maribacter sp. HTCC2170]
AIZ40501.1	gliding motility protein GldO [Cellulophaga baltica 18]
AIY12136.1	gliding motility protein GldO [Cellulophaga baltica NN016038]
ADV48208.1	protein involved in gliding motility GldN [Cellulophaga algicola DSM 14237]
CAZ95205.1	Gliding motility protein [Zobellia galactanivorans]
SCD19409.1	gliding motility associated protein GldN [Proteiniphilum saccharofermentans]
ADE81181.1	conserved hypothetical protein [Prevotella ruminicola 23]
AEW03079.1	gliding motility associated protein GldN [Niastella koreensis GR20-10]
ALJ60616.1	hypothetical protein BcellWH2_03383 [Bacteroides cellulosilyticus]
EFC70481.2	gliding motility associated protein GldN [Prevotella sp. oral taxon 299 str. F0039]
AHW59464.1	gliding motility protein GldN [Draconibacterium orientale]
ALO16079.1	gliding motility associated protein GldN [bacterium L21-Spi-D4]
APG61474.1	gliding motility protein GldN [Gramella sp. LPB0144]
AOE52259.1	gliding motility protein GldO [Flavobacterium psychrophilum]
AMR30225.1	gliding motility protein GldN [Mucilaginibacter sp. PAMC 26640]
EAP87237.1	hypothetical protein CA2559_00740 [Croceibacter atlanticus HTCC2559]
AFD08327.1	gliding motility associated protein GldN [Solitalea canadensis DSM 3403]
ANW97057.1	hypothetical protein AXE80_12510 [Wenyingzhuangia fucanilytica]
AOZ99739.1	gliding motility protein GldN [Flavobacterium sp. PK15]
AEA44277.1	gliding motility associated protein GldN [Fluviicola taffensis DSM 16823]
CAL67957.1	gliding motility protein GldO [Gramella forsetii KT0803]
AEM69889.1	gliding motility associated protein GldN [Muricauda ruestringensis DSM 13258]
AGC75988.1	gliding motility protein [Nonlabens dokdonensis DSW-6]
AMD84448.1	gliding motility protein GldN [Capnocytophaga haemolytica]
AAQ65506.1	hypothetical protein PG_0287 [Porphyromonas gingivalis W83]
BAK25549.1	hypothetical protein PGTDC60_1399 [Porphyromonas gingivalis TDC60]
ALO30274.1	Bacteroidetes-specific putative membrane protein [Porphyromonas gingivalis A7A1-28]
AKV64809.1	Bacteroidetes-specific putative membrane protein [Porphyromonas gingivalis]
ALJ26081.1	Bacteroidetes-specific putative membrane protein [Porphyromonas gingivalis 381]
BAG34196.1	Por secretion system protein porP [Porphyromonas gingivalis ATCC 33277]
ALA94152.1	Bacteroidetes-specific putative membrane protein [Porphyromonas gingivalis AJW4]
APU70298.1	hypothetical protein GRFL_3574 [Gramella flava JLT2011]
APG65175.1	hypothetical protein LPB136_07370 [Tenacibaculum sp. LPB0136]
AEE13517.1	putative membrane protein [Porphyromonas asaccharolytica DSM 20707]
BAR96558.1	hypothetical protein PI172_1830 [Prevotella intermedia]
AFJ08836.1	Bacteroidetes-specific putative membrane protein [Prevotella intermedia 17]
ANU63168.1	hypothetical protein A4V02_05170 [Parabacteroides sp. YL27]
APW32674.1	hypothetical protein BWX39_00240 [Prevotella intermedia ATCC 25611 = DSM 20706]
BAR51201.1	bacteroidetes-specific putative membraneprotein [Tannerella forsythia KS16]
BAR48722.1	bacteroidetes-specific putative membrane protein [Tannerella forsythia 3313]
AEW20076.1	Bacteroidetes-specific putative membrane protein [Tannerella forsythia 92A2]
AKU69185.1	hypothetical protein ADJ77_05055 [Prevotella fusca JCM 17724]
AEA20125.1	Bacteroidetes-specific putative membrane protein [Prevotella denticola F0289]
AGB27567.1	Bacteroidetes-specific putative membrane protein [Prevotella dentalis DSM 3688]
AHW59466.1	membrane protein [Draconibacterium orientale]
AOC97376.1	hypothetical protein BB050_04298 [Flavobacterium johnsoniae]
APS39981.1	hypothetical protein AO058_14355 [Salegentibacter sp. T436]
AOH40371.1	hypothetical protein BCB71_04060 [Tannerella sp. oral taxon HOT-286]
ALJ60612.1	hypothetical protein BcellWH2_03379 [Bacteroides cellulosilyticus]
ALO16075.1	Bacteroidetes-specific putative membrane protein [bacterium L21-Spi-D4]
SCM59451.1	putative protein {ECO:0000313|EMBL:EIY43802,1} [Petrimonas mucosa]
CAL66807.1	conserved hypothetical protein, secreted [Gramella forsetii KT0803]
APG59407.1	hypothetical protein LPB144_02835 [Gramella sp. LPB0144]
ALU28059.1	hypothetical protein AS202_18740 [Myroides odoratimimus]
AEV97868.1	putative membrane protein [Niastella koreensis GR20-10]
EFC70477.1	hypothetical protein HMPREF0669_01457 [Prevotella sp. oral taxon 299 str. F0039]
ADQ80634.1	putative membrane protein [Paludibacter propionicigenes WB4]
AHM61047.1	membrane protein [Flammeovirgaceae bacterium 311]
AEA45326.1	putative membrane protein [Fluviicola taffensis DSM 16823]
ADB39237.1	putative membrane protein [Spirosoma linguale DSM 74]
AFL83324.1	Bacteroidetes-specific putative membrane protein [Belliella baltica DSM 15883]
AEM70720.1	putative membrane protein [Muricauda ruestringensis DSM 13258]
CCG53126.1	Protein of unknown function precursor [Flavobacterium indicum GPTSA100-9 = DSM 17447]
AEE49345.1	putative membrane protein [Haliscomenobacter hydrossis DSM 1100]
ALJ03941.1	hypothetical protein APS56_01700 [Algibacter alginolytica]
ADY28349.1	putative membrane protein [Cellulophaga lytica DSM 7489]
EAQ42643.2	hypothetical protein MED152_07975 [Polaribacter sp. MED152]
CCB69274.1	Protein of unknown function precursor [Flavobacterium branchiophilum FL-15]
AOR26578.1	membrane protein [Formosa sp. Hel3_A1_48]
AOR28601.1	membrane protein [Formosa sp. Hel1_33_131]
ADR22958.1	putative membrane protein [Marivirga tractuosa DSM 4126]
APY12266.1	hypothetical protein BWZ22_13975 [Seonamhaeicola sp. S2-3]
CAL44466.1	Protein of unknown function precursor PorP [Flavobacterium psychrophilum JIP02/86]
AIN74961.1	membrane protein [Flavobacterium psychrophilum FPG3]
AIN72633.1	membrane protein [Flavobacterium psychrophilum FPG101]
ACU61086.1	hypothetical protein Cpin_3624 [Chitinophaga pinensis DSM 2588]
AKD03907.1	hypothetical protein PKOR_13315 [Pontibacter korlensis]
AOZ98046.1	hypothetical protein BIW12_00550 [Flavobacterium sp. PK15]
ADZ78650.1	putative membrane protein [Sphingobacterium sp. 21]
AMP99193.1	Putative membrane protein [Pedobacter cryoconitis]
AJR03396.1	membrane protein [Siansivirga zeaxanthinifaciens CC-SAMT-1]
EAR00634.1	hypothetical protein FB2170_16156 [Maribacter sp. HTCC2170]
ACU03857.1	hypothetical protein Phep_1645 [Pedobacter heparinus DSM 2366]
AIM60729.1	membrane protein [Cellulophaga lytica]
APD05942.1	hypothetical protein UJ101_00395 [Flavobacteriaceae bacterium UJ101]
ABR45029.1	conserved hypothetical protein [Parabacteroides distasonis ATCC 8503]
AHF12556.1	membrane protein [Barnesiella viscericola DSM 18177]
ADE82242.1	conserved hypothetical protein [Prevotella ruminicola 23]
SCD19413.1	hypothetical protein PSM36_0583 [Proteiniphilum saccharofermentans]
AEV33762.1	Bacteroidetes-specific putative membrane protein [Owenweeksia hongkongensis DSM 17368]
AMQ55033.1	hypothetical protein AO498_01425 [Algoriphagus sp. M8-2]
AGA76902.1	Bacteroidetes-specific putative membrane protein [Echinicola vietnamensis DSM 17526]
ABQ06961.1	hypothetical protein Fjoh_3951 [Flavobacterium johnsoniae UW101]
AKD56409.1	membrane protein [Spirosoma radiotolerans]
AOE52153.1	hypothetical protein ALW18_06240 [Flavobacterium psychrophilum]
AFU67172.1	Bacteroidetes-specific membrane protein [Psychroflexus torquis ATCC 700755]
ALM06550.1	membrane protein [Sediminicola sp. YIK13]
APA63407.1	membrane protein [Maribacter sp. 1_2014MBL_MicDiv]
AKP50701.1	Putative membrane protein [Cyclobacterium amurskyense]
AFL80994.1	Bacteroidetes-specific putative membrane protein [Aequorivita sublithincola DSM 14238]
CAZ97043.1	Conserved hypothetical periplasmic protein [Zobellia galactanivorans]
AIZ62962.1	hypothetical protein PK28_03340 [Hymenobacter sp. DG25B]
ALD22806.1	hypothetical protein AM218_12855 [Hymenobacter sp. DG25A]
AEE18151.1	putative membrane protein [Dokdonia sp. 4H-3-7-5]
APY00888.1	hypothetical protein BWR22_11385 [Lacinutrix venerupis]
ALJ01037.1	hypothetical protein DC20_21120 [Rufibacter tibetensis]
AKQ44968.1	hypothetical protein TH63_03915 [Rufibacter sp. DG31D]
AFD07407.1	Bacteroidetes-specific putative membrane protein [Solitalea canadensis DSM 3403]
ANW97049.1	hypothetical protein AXE80_12470 [Wenyingzhuangia fucanilytica]
AJH15617.1	membrane protein [Myroides profundi]
ALM20999.1	membrane protein [Nonlabens sp. MIC269]
ADV48903.1	putative membrane protein [Cellulophaga algicola DSM 14237]
ACU93243.1	conserved hypothetical protein [Capnocytophaga ochracea DSM 7271]
ALC96327.1	hypothetical protein AM608_00980 [Capnocytophaga sp. oral taxon 323]
AGC76429.1	hypothetical protein DDD_1302 [Nonlabens dokdonensis DSW-6]
AMD84850.1	hypothetical protein AXF12_04570 [Capnocytophaga haemolytica]
EAR14163.1	hypothetical protein RB2501_02015 [Robiginitalea biformata HTCC2501]
APQ19238.1	hypothetical protein BTR34_03710 [Maribacter sp. T28]
AKA35852.1	Putative membrane protein [Muricauda lutaonensis]
AEW86879.1	hypothetical protein FCOL_10360 [Flavobacterium columnare ATCC 49512]
ADF53395.1	conserved hypothetical protein [Zunongwangia profunda SM-A87]
AMS27390.1	hypothetical protein AEM51_10550 [Bacteroidetes bacterium UKL13-3]
BAO77152.1	hypothetical protein WPG_2922 [Winogradskyella sp. PG-2]
APY07018.1	hypothetical protein BWZ20_01305 [Winogradskyella sp. J14-2]
AFK02450.1	putative membrane protein [Emticicia oligotrophica DSM 17448]
AII51665.1	hypothetical protein N008_06665 [Hymenobacter sp. APR13]
AEH02496.1	putative membrane protein [Lacinutrix sp. 5H-3-7-4]
APZ45666.1	hypothetical protein BW723_04850 [Polaribacter reichenbachii]
AOW18951.1	hypothetical protein LPB03_00300 [Polaribacter sp. LPB0003]
ALO49982.1	hypothetical protein AS203_10655 [Prevotella enoeca]
APA93369.1	hypothetical protein BK054_14270 [Myroides sp. ZB35]
AJA70106.1	Bacteroidetes-specific putative membrane protein [Myroides sp. A21]
ANH59271.1	hypothetical protein I597_0339 [Dokdonia donghaensis DSW-1]
EAQ39370.1	hypothetical protein MED134_07766 [Dokdonia sp. MED134]
ADY51609.1	putative membrane protein [Pseudopedobacter saltans DSM 12145]
AEK22521.1	Conserved hypothetical protein [Capnocytophaga canimorsus Cc5]
AEI49378.1	putative membrane protein [Runella slithyformis DSM 19594]
ABG57462.1	conserved hypothetical protein [Cytophaga hutchinsonii ATCC 33406]
AOW22130.1	hypothetical protein LPB138_14255 [Lutibacter sp. LPB0138]
APT23016.1	hypothetical protein BU993_10540 [Flavobacterium columnare]
EAP87088.1	hypothetical protein CA2559_13648 [Croceibacter atlanticus HTCC2559]
ANQ49352.1	Putative membrane protein [Flammeovirga sp. MY04]
AEL24922.1	putative membrane protein [Cyclobacterium marinum DSM 745]
ALL07143.1	hypothetical protein AQ505_17610 [Pedobacter sp. PACM 27299]
ANE53419.1	membrane protein [Flavisolibacter sp. LCS9]
AOW10368.1	hypothetical protein EM308_13125 [Flavobacterium sp. EM1308]
AFM04867.1	Bacteroidetes-specific putative membrane protein [Bernardetia litoralis DSM 6794]
AIZ41745.1	membrane protein [Cellulophaga baltica 18]
AIY13389.1	membrane protein [Cellulophaga baltica NN016038]
AMC11704.1	hypothetical protein Lupro_10680 [Lutibacter sp. LP1]
ALW84285.1	hypothetical protein AUC43_03730 [Hymenobacter sp. DG5B]
AMR32841.1	hypothetical protein A0256_16150 [Mucilaginibacter sp. PAMC 26640]
ALU74757.1	hypothetical protein AUW17_05495 [Tenacibaculum dicentrarchi]
AFC24326.1	hypothetical protein SGRA_1591 [Saprospira grandis str. Lewin]
AMR27753.1	hypothetical protein A0257_12040 [Hymenobacter sp. PAMC 26554]
AMJ67353.1	hypothetical protein AXW84_19455 [Hymenobacter sp. PAMC 26628]
AHJ95867.1	hypothetical protein Hsw_0272 [Hymenobacter swuensis DY53]
AFL96795.1	Bacteroidetes-specific putative membrane protein [Ornithobacterium rhinotracheale DSM 15997]
AIQ00551.1	hypothetical protein Q785_06770 [Ornithobacterium rhinotracheale ORT-UMN 88]
AMM51773.1	hypothetical protein TH61_12120 [Rufibacter sp. DG15C]
ADQ19132.1	putative membrane protein [Leadbetterella byssophila DSM 17132]
ACT96939.1	hypothetical protein Dfer_5751 [Dyadobacter fermentans DSM 18053]
AKV64544.1	hypothetical protein PGA7_00013390 [Porphyromonas gingivalis]
AAQ65786.1	hypothetical protein PG_0602 [Porphyromonas gingivalis W83]
BAG33164.1	Por secretion system protein porQ [Porphyromonas gingivalis ATCC 33277]
BAK25877.1	hypothetical protein PGTDC60_1728 [Porphyromonas gingivalis TDC60]
ALJ25089.1	hypothetical protein PGF_00006290 [Porphyromonas gingivalis 381]
ALA93874.1	hypothetical protein PGJ_00012740 [Porphyromonas gingivalis AJW4]
ALO30012.1	hypothetical protein PGS_00013090 [Porphyromonas gingivalis A7A1-28]
AEW21447.1	hypothetical protein BFO_0952 [Tannerella forsythia 92A2]
AFC24376.1	hypothetical protein SGRA_1641 [Saprospira grandis str. Lewin]
AHW59763.1	penicillin-binding protein [Draconibacterium orientale]
BAR48451.1	hypothetical protein TF3313_0891 [Tannerella forsythia 3313]
BAR51469.1	hypothetical protein TFKS16_1202 [Tannerella forsythia KS16]
ABR45425.1	conserved hypothetical protein [Parabacteroides distasonis ATCC 8503]
ALJ58790.1	hypothetical protein BcellWH2_01536 [Bacteroides cellulosilyticus]
ADQ80924.1	hypothetical protein Palpr_2795 [Paludibacter propionicigenes WB4]
ADX67942.1	low affinity penicillin binding protein [Weeksella virosa DSM 16922]
AJR04315.1	penicillin-binding protein [Siansivirga zeaxanthinifaciens CC-SAMT-1]
APY12248.1	penicillin-binding protein [Seonamhaeicola sp. S2-3]
CCG53024.1	Protein of unknown function precursor PorQ [Flavobacterium indicum GPTSA100-9 = DSM 17447]
EAQ38910.1	hypothetical protein MED134_02905 [Dokdonia sp. MED134]
ANH61508.1	hypothetical protein I597_2611 [Dokdonia donghaensis DSW-1]
CAL43780.1	Protein of unknown function precursor PorQ [Flavobacterium psychrophilum JIP02/86]
AIN74510.1	penicillin-binding protein [Flavobacterium psychrophilum FPG3]
AIN71400.1	penicillin-binding protein [Flavobacterium psychrophilum FPG101]
ABG60232.1	conserved hypothetical protein [Cytophaga hutchinsonii ATCC 33406]
AHF12369.1	hypothetical protein BARVI_05815 [Barnesiella viscericola DSM 18177]
ALO16038.1	hypothetical protein L21SP5_02410 [bacterium L21-Spi-D4]
ANE50028.1	hypothetical protein SY85_05475 [Flavisolibacter sp. LCS9]
AOH41228.1	DUF3308 domain-containing protein [Tannerella sp. oral taxon HOT-286]
ADK97253.1	hypothetical protein HMPREF0659_A7166 [Prevotella melaninogenica ATCC 25845]
AKU69763.1	histidine kinase [Prevotella fusca JCM 17724]
APW32958.1	DUF3308 domain-containing protein [Prevotella intermedia ATCC 25611 = DSM 20706]
ADE82884.1	conserved hypothetical protein [Prevotella ruminicola 23]
ACU07733.1	low affinity penicillin binding protein [Flavobacteriaceae bacterium 3519-10]
CCB69879.1	Protein of unknown function precursor PorQ [Flavobacterium branchiophilum FL-15]
ALW85443.1	hypothetical protein AUC43_10255 [Hymenobacter sp. DG5B]
AEV99983.1	hypothetical protein Niako_3685 [Niastella koreensis GR20-10]
BAR97019.1	low affinity penicillin binding protein [Prevotella intermedia]
AFJ07596.1	PF11751 family protein [Prevotella intermedia 17]
AEA20999.1	hypothetical protein HMPREF9137_2099 [Prevotella denticola F0289]
ALR30263.1	penicillin-binding protein [Chryseobacterium sp. IHB B 17019]
AOW19282.1	penicillin-binding protein [Lutibacter sp. LPB0138]
AGC77804.1	hypothetical protein DDD_2677 [Nonlabens dokdonensis DSW-6]
BAP31446.1	low affinity penicillin binding protein [Chryseobacterium sp. StRB126]
ANF52604.1	penicillin-binding protein [Chryseobacterium sp. IHB B 10212]
AKK74246.1	penicillin-binding protein [Chryseobacterium gallinarum]
AKP70815.1	low affinity penicillin binding protein [Riemerella anatipestifer]
ADQ81694.1	low affinity penicillin binding protein [Riemerella anatipestifer ATCC 11845 = DSM 15868]
ADZ12810.1	hypothetical protein RIA_1736 [Riemerella anatipestifer RA-GD]
AGC40398.1	hypothetical protein G148_1094 [Riemerella anatipestifer RA-CH-2]
AKQ39248.1	penicillin-binding protein [Riemerella anatipestifer Yb2]
AOR25245.1	penicillin-binding protein [Formosa sp. Hel3_A1_48]
APZ47826.1	penicillin-binding protein [Polaribacter reichenbachii]
AOW15958.1	penicillin-binding protein [Polaribacter sp. LPB0003]
AKD03384.1	hypothetical protein PKOR_09945 [Pontibacter korlensis]
AIZ65257.1	hypothetical protein PK28_14095 [Hymenobacter sp. DG25B]
ACU59532.1	hypothetical protein Cpin_2037 [Chitinophaga pinensis DSM 2588]
ALO49277.1	histidine kinase [Prevotella enoeca]
AOR27158.1	penicillin-binding protein [Formosa sp. Hel1_33_131]
AFU70205.1	hypothetical protein P700755_003606 [Psychroflexus torquis ATCC 700755]
ALM20056.1	penicillin-binding protein [Nonlabens sp. MIC269]
ALJ03924.1	penicillin-binding protein [Algibacter alginolytica]
AFR36079.1	hypothetical protein B739_1486 [Riemerella anatipestifer RA-CH-1]
AIH03078.1	low affinity penicillin binding protein [Riemerella anatipestifer CH3]
ANO48187.1	hypothetical protein Pf1_02733 [Flavobacterium columnare]
AEW84917.1	hypothetical protein FCOL_00310 [Flavobacterium columnare ATCC 49512]
EAP86428.1	hypothetical protein CA2559_10348 [Croceibacter atlanticus HTCC2559]
ABQ05777.1	hypothetical protein Fjoh_2755 [Flavobacterium johnsoniae UW101]
AOC96731.1	hypothetical protein BB050_03649 [Flavobacterium johnsoniae]
AEE13025.1	hypothetical protein Poras_1083 [Porphyromonas asaccharolytica DSM 20707]
EFC70277.1	hypothetical protein HMPREF0669_01578 [Prevotella sp. oral taxon 299 str. F0039]
AGB28860.1	hypothetical protein Prede_1550 [Prevotella dentalis DSM 3688]
ANU64799.1	hypothetical protein A4V02_07880 [Parabacteroides sp. YL27]
BAO77137.1	low affinity penicillin binding protein [Winogradskyella sp. PG-2]
APY07004.1	penicillin-binding protein [Winogradskyella sp. J14-2]
ALD20281.1	hypothetical protein AM218_02335 [Hymenobacter sp. DG25A]
AEH02509.1	hypothetical protein Lacal_2669 [Lacinutrix sp. 5H-3-7-4]
AOW10187.1	penicillin-binding protein [Flavobacterium sp. EM1308]
APY00114.1	penicillin-binding protein [Lacinutrix venerupis]
AMC10496.1	penicillin-binding protein [Lutibacter sp. LP1]
AFL82083.1	hypothetical protein Aeqsu_2630 [Aequorivita sublithincola DSM 14238]
AEE18255.1	hypothetical protein Krodi_0268 [Dokdonia sp. 4H-3-7-5]
AMS27237.1	hypothetical protein AEM51_09630 [Bacteroidetes bacterium UKL13-3]
ACT94188.1	conserved hypothetical protein [Dyadobacter fermentans DSM 18053]
AKD58455.1	hypothetical protein SD10_10490 [Spirosoma radiotolerans]
AKQ46236.1	hypothetical protein TH63_12380 [Rufibacter sp. DG31D]
ALI98124.1	hypothetical protein DC20_02940 [Rufibacter tibetensis]
ADR20810.1	hypothetical protein Ftrac_0808 [Marivirga tractuosa DSM 4126]
ANQ50012.1	Hypothetical protein MY04_2643 [Flammeovirga sp. MY04]
AMJ66783.1	hypothetical protein AXW84_16145 [Hymenobacter sp. PAMC 26628]
AOE53971.1	penicillin-binding protein [Flavobacterium psychrophilum]
APG64360.1	penicillin-binding protein [Tenacibaculum sp. LPB0136]
ANW95493.1	hypothetical protein AXE80_04010 [Wenyingzhuangia fucanilytica]
ADB37676.1	hypothetical protein Slin_1629 [Spirosoma linguale DSM 74]
AEV32563.1	hypothetical protein Oweho_1573 [Owenweeksia hongkongensis DSM 17368]
AEA44739.1	hypothetical protein Fluta_2759 [Fluviicola taffensis DSM 16823]
AHJ98764.1	hypothetical protein Hsw_3169 [Hymenobacter swuensis DY53]
AEE51227.1	hypothetical protein Halhy_3369 [Haliscomenobacter hydrossis DSM 1100]
AMM50186.1	hypothetical protein TH61_01965 [Rufibacter sp. DG15C]
AEN72374.1	hypothetical protein Rhom172_0430 [Rhodothermus marinus SG0.5JP17-172]
AFM05159.1	hypothetical protein Fleli_2806 [Bernardetia litoralis DSM 6794]
AII52917.1	hypothetical protein N008_13135 [Hymenobacter sp. APR13]
AFK01861.1	hypothetical protein Emtol_0708 [Emticicia oligotrophica DSM 17448]
ACY47337.1	hypothetical protein Rmar_0435 [Rhodothermus marinus DSM 4252]
EAQ41049.2	hypothetical protein MED152_00005 [Polaribacter sp. MED152]
AFL86240.1	hypothetical protein Belba_3757 [Belliella baltica DSM 15883]
AMR27361.1	hypothetical protein A0257_09815 [Hymenobacter sp. PAMC 26554]
AHM62148.1	hypothetical protein D770_19485 [Flammeovirgaceae bacterium 311]
AKV64062.1	putative PLP-dependent enzyme [Porphyromonas gingivalis]
AAQ66245.1	pigmentation and extracellular proteinase regulator [Porphyromonas gingivalis W83]
BAG33755.1	regulator PorR [Porphyromonas gingivalis ATCC 33277]
ALJ25658.1	putative PLP-dependent protein [Porphyromonas gingivalis 381]
ALA93413.1	putative PLP-dependent enzyme [Porphyromonas gingivalis AJW4]
ALO29543.1	putative PLP-dependent enzyme [Porphyromonas gingivalis A7A1-28]
AFL85708.1	putative PLP-dependent enzyme possibly involved in cell wall biogenesis [Belliella baltica DSM 15883]
AHM61772.1	degt/dnrj/eryc1/strs aminotransferase [Flammeovirgaceae bacterium 311]
EAR16011.1	pigmentation and extracellular proteinase regulator [Robiginitalea biformata HTCC2501]
ALD21149.1	transcriptional regulator [Hymenobacter sp. DG25A]
AII50423.1	hypothetical protein N008_00300 [Hymenobacter sp. APR13]
AGA80074.1	putative PLP-dependent enzyme possibly involved in cell wall biogenesis [Echinicola vietnamensis DSM 17526]
BAR95660.1	aminotransferase [Prevotella intermedia]
AEL24157.1	DegT/DnrJ/EryC1/StrS aminotransferase [Cyclobacterium marinum DSM 745]
BAK25232.1	pigmentation and extracellular proteinase regulator PorR [Porphyromonas gingivalis TDC60]
ADY32031.1	Glutamine--scyllo-inositol transaminase [Odoribacter splanchnicus DSM 20712]
ANF51536.1	transcriptional regulator [Chryseobacterium sp. IHB B 10212]
ALR31088.1	transcriptional regulator [Chryseobacterium sp. IHB B 17019]
AMS26541.1	Pleiotropic regulatory protein [Bacteroidetes bacterium UKL13-3]
AHF14219.1	Pleiotropic regulatory protein [Niabella soli DSM 19437]
ABR44503.1	putative aminotransferase [Parabacteroides distasonis ATCC 8503]
ACU59011.1	DegT/DnrJ/EryC1/StrS aminotransferase [Chitinophaga pinensis DSM 2588]
AGY53124.1	Pleiotropic regulatory protein [Bacteroidales bacterium CF]
APU68783.1	Pleiotropic regulatory protein [Gramella flava JLT2011]
AFC24661.1	DegT/DnrJ/EryC1/StrS aminotransferase [Saprospira grandis str. Lewin]
AOE53269.1	transcriptional regulator [Flavobacterium psychrophilum]
AOW21595.1	transcriptional regulator [Lutibacter sp. LPB0138]
APQ17786.1	transcriptional regulator [Maribacter sp. T28]
APS37568.1	transcriptional regulator [Salegentibacter sp. T436]
AIP99706.1	Pleiotropic regulatory protein [Ornithobacterium rhinotracheale ORT-UMN 88]
ALU26206.1	transcriptional regulator [Myroides odoratimimus]
APA92257.1	transcriptional regulator [Myroides sp. ZB35]
ALM08857.1	Pleiotropic regulatory protein [Sediminicola sp. YIK13]
APY08809.1	transcriptional regulator [Winogradskyella sp. J14-2]
AMC11728.1	transcriptional regulator [Lutibacter sp. LP1]
APY01199.1	transcriptional regulator [Lacinutrix venerupis]
CAL65260.1	DegT-like DegT/DnrJ/EryC1/StrS family aminotransferase [Gramella forsetii KT0803]
AEW01267.1	Glutamine--scyllo-inositol transaminase [Niastella koreensis GR20-10]
ALM20906.1	Pleiotropic regulatory protein [Nonlabens sp. MIC269]
ACU92237.1	DegT/DnrJ/EryC1/StrS aminotransferase [Capnocytophaga ochracea DSM 7271]
BAO75011.1	pleiotropic regulatory protein [Winogradskyella sp. PG-2]
ADQ78753.1	DegT/DnrJ/EryC1/StrS aminotransferase [Paludibacter propionicigenes WB4]
ALJ05234.1	transcriptional regulator [Algibacter alginolytica]
BAP30862.1	pleiotropic regulatory protein DegT [Chryseobacterium sp. StRB126]
AJR03237.1	Pleiotropic regulatory protein [Siansivirga zeaxanthinifaciens CC-SAMT-1]
EAP87033.1	pigmentation and extracellular proteinase regulator [Croceibacter atlanticus HTCC2559]
AND63494.1	transcriptional regulator [Flavobacterium columnare]
ALO15262.1	UDP-2-acetamido-2-deoxy-3-oxo-D-glucuronate aminotransferase [bacterium L21-Spi-D4]
ALU75768.1	transcriptional regulator [Tenacibaculum dicentrarchi]
APG61420.1	transcriptional regulator [Gramella sp. LPB0144]
CAZ96477.1	PorR protein, PLP-dependent aminotransferase family [Zobellia galactanivorans]
CAL42516.1	PorR protein, probably involved in biosynthesis of cell surface polysaccharide [Flavobacterium psychrophilum JIP02/86]
AIN73303.1	Pleiotropic regulatory protein [Flavobacterium psychrophilum FPG3]
AIN70900.1	Pleiotropic regulatory protein [Flavobacterium psychrophilum FPG101]
EAR02277.1	pigmentation and extracellular proteinase regulator [Maribacter sp. HTCC2170]
AFD55575.1	degt/dnrj/eryc1/strs aminotransferase [Riemerella anatipestifer ATCC 11845 = DSM 15868]
ADZ12951.1	Predicted pyridoxal phosphate-dependent enzyme apparently involved in regulation of cell wall biogenesis [Riemerella anatipestifer RA-GD]
AFR36280.1	putative pyridoxal phosphate-dependent enzyme apparently involved in regulation of cell wall biogenesis [Riemerella anatipestifer RA-CH-1]
AGC40543.1	putative pyridoxal phosphate-dependent enzyme apparently involved in regulation of cell wall biogenesis [Riemerella anatipestifer RA-CH-2]
AIH03236.1	degt/dnrj/eryc1/strs aminotransferase [Riemerella anatipestifer CH3]
AKQ39111.1	Pleiotropic regulatory protein [Riemerella anatipestifer Yb2]
APY11314.1	transcriptional regulator [Seonamhaeicola sp. S2-3]
AEW85503.1	DegT/DnrJ/EryC1/StrS aminotransferase [Flavobacterium columnare ATCC 49512]
APA64768.1	Pleiotropic regulatory protein [Maribacter sp. 1_2014MBL_MicDiv]
AOR28052.1	pleiotropic regulatory protein [Formosa sp. Hel1_33_131]
APG65260.1	transcriptional regulator [Tenacibaculum sp. LPB0136]
BAR51497.1	pleiotropic regulatory protein DegT [Tannerella forsythia KS16]
AKK73823.1	Pleiotropic regulatory protein [Chryseobacterium gallinarum]
AEW20731.1	pleiotropic regulatory protein DegT [Tannerella forsythia 92A2]
APU10329.1	transcriptional regulator [Cellulophaga lytica]
AMM52012.1	Pleiotropic regulatory protein [Rufibacter sp. DG15C]
AOR26129.1	pleiotropic regulatory protein [Formosa sp. Hel3_A1_48]
BAR48423.1	pleiotropic regulatory protein [Tannerella forsythia 3313]
APA00942.1	transcriptional regulator [Flavobacterium sp. PK15]
AKH94326.1	Pleiotropic regulatory protein [Elizabethkingia anophelis FMS-007]
AMX54040.1	transcriptional regulator [Elizabethkingia anophelis]
AIL45786.1	Pleiotropic regulatory protein [Elizabethkingia anophelis NUHP1]
AEK23986.1	Pleiotropic regulatory protein [Capnocytophaga canimorsus Cc5]
ACU02773.1	DegT/DnrJ/EryC1/StrS aminotransferase [Pedobacter heparinus DSM 2366]
AEN74059.1	Glutamine--scyllo-inositol transaminase [Rhodothermus marinus SG0.5JP17-172]
ABQ04759.1	DegT/DnrJ/EryC1/StrS aminotransferase [Flavobacterium johnsoniae UW101]
AOW18600.1	transcriptional regulator [Polaribacter sp. LPB0003]
APZ44965.1	transcriptional regulator [Polaribacter reichenbachii]
CCB68566.1	PorR protein, probably involved in biosynthesis of cell surface polysaccharide [Flavobacterium branchiophilum FL-15]
AOC94020.1	UDP-2-acetamido-2-deoxy-3-oxo-D-glucuronate aminotransferase [Flavobacterium johnsoniae]
AIZ41414.1	Pleiotropic regulatory protein [Cellulophaga baltica 18]
ACU07052.1	pigmentation and extracellular proteinase regulator [Flavobacteriaceae bacterium 3519-10]
AIZ63711.1	Pleiotropic regulatory protein [Hymenobacter sp. DG25B]
AIY13047.1	Pleiotropic regulatory protein [Cellulophaga baltica NN016038]
AHW59693.1	Pleiotropic regulatory protein [Draconibacterium orientale]
AHJ97227.1	hypothetical protein Hsw_1632 [Hymenobacter swuensis DY53]
ADY53757.1	DegT/DnrJ/EryC1/StrS aminotransferase [Pseudopedobacter saltans DSM 12145]
AMR25830.1	transcriptional regulator [Hymenobacter sp. PAMC 26554]
AKD01953.1	aminotransferase [Pontibacter korlensis]
AKD54327.1	aminotransferase [Spirosoma radiotolerans]
SCV10170.1	hypothetical protein BACOV975_03964 [Bacteroides ovatus V975]
ALJ45824.1	dTDP-3-amino-3,6-dideoxy-alpha-D-galactopyranose transaminase [Bacteroides ovatus]
ADV44899.1	DegT/DnrJ/EryC1/StrS aminotransferase [Bacteroides helcogenes P 36-108]
SCM58849.1	dTDP-3-amino-3, 6-dideoxy-alpha-D-galactopyranosetransaminase [Petrimonas mucosa]
AMQ57680.1	cell wall biogenesis protein [Algoriphagus sp. M8-2]
CDN32788.1	UDP-4-amino-4-deoxy-L-arabinose--oxoglutarate aminotransferase [Mucinivorans hirudinis]
ALO48456.1	aminotransferase [Prevotella enoeca]
AEE12189.1	DegT/DnrJ/EryC1/StrS aminotransferase [Porphyromonas asaccharolytica DSM 20707]
AKP49762.1	Aminotransferase [Cyclobacterium amurskyense]
ADB36354.1	DegT/DnrJ/EryC1/StrS aminotransferase [Spirosoma linguale DSM 74]
SCD20515.1	3-amino-5-hydroxybenzoic acid synthase family [Proteiniphilum saccharofermentans]
AFK05353.1	DegT/DnrJ/EryC1/StrS aminotransferase [Emticicia oligotrophica DSM 17448]
EFC71773.1	hypothetical protein HMPREF0669_00445 (plasmid) [Prevotella sp. oral taxon 299 str. F0039]
AOM79231.1	aminotransferase [Pedobacter steynii]
ACT94625.1	DegT/DnrJ/EryC1/StrS aminotransferase [Dyadobacter fermentans DSM 18053]
ADE83692.1	aminotransferase, DegT/DnrJ/EryC1/StrS family [Prevotella ruminicola 23]
ADQ16386.1	DegT/DnrJ/EryC1/StrS aminotransferase [Leadbetterella byssophila DSM 17132]
ANE50255.1	Pleiotropic regulatory protein [Flavisolibacter sp. LCS9]
AEE51265.1	DegT/DnrJ/EryC1/StrS aminotransferase [Haliscomenobacter hydrossis DSM 1100]
AEA44044.1	Glutamine--scyllo-inositol transaminase [Fluviicola taffensis DSM 16823]
AEM70837.1	DegT/DnrJ/EryC1/StrS aminotransferase [Muricauda ruestringensis DSM 13258]
AEV32659.1	putative PLP-dependent enzyme possibly involved in cell wall biogenesis [Owenweeksia hongkongensis DSM 17368]
AKA35467.1	DegT/DnrJ/EryC1/StrS aminotransferase [Muricauda lutaonensis]
ANW96581.1	transcriptional regulator [Wenyingzhuangia fucanilytica]
AFL80237.1	putative PLP-dependent enzyme possibly involved in cell wall biogenesis [Aequorivita sublithincola DSM 14238]
AJH13812.1	PorR protein, probably involved in biosynthesis of cell surface polysaccharide [Myroides profundi]
AJA68961.1	putative pyridoxal phosphate-dependent enzyme apparently involved in regulation of cell wall biogenesis [Myroides sp. A21]
AFL97890.1	putative PLP-dependent enzyme possibly involved in cell wall biogenesis [Ornithobacterium rhinotracheale DSM 15997]
APD05668.1	3-oxo-glucose-6-phosphate:glutamate aminotransferase [Flavobacteriaceae bacterium UJ101]
ALC97495.1	transcriptional regulator [Capnocytophaga sp. oral taxon 323]
AMD85875.1	transcriptional regulator [Capnocytophaga haemolytica]
ADF53994.1	DegT/DnrJ/EryC1/StrS family aminotransferase [Zunongwangia profunda SM-A87]
EAQ38958.2	DegT/DnrJ/EryC1/StrS aminotransferase family protein [Dokdonia sp. MED134]
AGC76299.1	DegT/DnrJ/EryC1/StrS family aminotransferase [Nonlabens dokdonensis DSW-6]
ANH59196.1	UDP-2-acetamido-2-deoxy-3-oxo-D-glucuronate aminotransferase [Dokdonia donghaensis DSW-1]
AEH01340.1	DegT/DnrJ/EryC1/StrS aminotransferase [Lacinutrix sp. 5H-3-7-4]
AEE18780.1	DegT/DnrJ/EryC1/StrS aminotransferase [Dokdonia sp. 4H-3-7-5]
ADV49318.1	DegT/DnrJ/EryC1/StrS aminotransferase [Cellulophaga algicola DSM 14237]
AOH41516.1	transcriptional regulator [Tannerella sp. oral taxon HOT-286]
AJW62210.1	UDP-2-acetamido-2-deoxy-3-oxo-D-glucuronate aminotransferase [Elizabethkingia miricola]
EAQ42352.2	DegT/DnrJ/EryC1/StrS aminotransferase family protein [Polaribacter sp. MED152]
ACY47622.1	DegT/DnrJ/EryC1/StrS aminotransferase [Rhodothermus marinus DSM 4252]
ADY29444.1	DegT/DnrJ/EryC1/StrS aminotransferase [Cellulophaga lytica DSM 7489]
ADX67235.1	DegT/DnrJ/EryC1/StrS aminotransferase [Weeksella virosa DSM 16922]
AKQ45252.1	Pleiotropic regulatory protein [Rufibacter sp. DG31D]
ANI89253.1	transcriptional regulator [Arachidicoccus sp. BS20]
ALJ00297.1	transcriptional regulator [Rufibacter tibetensis]
AFL77297.1	putative PLP-dependent enzyme possibly involved in cell wall biogenesis [Alistipes finegoldii DSM 17242]
AMJ68132.1	transcriptional regulator [Hymenobacter sp. PAMC 26628]
AEI50300.1	Glutamine--scyllo-inositol transaminase [Runella slithyformis DSM 19594]
AFD08179.1	putative PLP-dependent enzyme possibly involved in cell wall biogenesis [Solitalea canadensis DSM 3403]
ANU64847.1	hypothetical protein A4V02_10525 [Parabacteroides sp. YL27]
AGB27825.1	putative PLP-dependent enzyme possibly involved in cell wall biogenesis [Prevotella dentalis DSM 3688]
ALL05842.1	aminotransferase [Pedobacter sp. PACM 27299]
ANH81533.1	transcriptional regulator [Niabella ginsenosidivorans]
AOW09225.1	transcriptional regulator [Flavobacterium sp. EM1308]
CCG54310.1	PorR protein, probably involved in biosynthesis of cell surface polysaccharide [Flavobacterium indicum GPTSA100-9 = DSM 17447]
AFU70197.1	lipopolysaccharide sugar aminotransferase [Psychroflexus torquis ATCC 700755]
ABG60724.1	aminotransferase, DegT/DnrJ/EryC1/StrS faily [Cytophaga hutchinsonii ATCC 33406]
AFJ09149.1	DegT/DnrJ/EryC1/StrS aminotransferase family protein [Prevotella intermedia 17]
ANQ49503.1	Aminotransferase, DegT/DnrJ/EryC1/StrS faily [Flammeovirga sp. MY04]
APW32742.1	aminotransferase [Prevotella intermedia ATCC 25611 = DSM 20706]
ADK97043.1	DegT/DnrJ/EryC1/StrS aminotransferase family protein [Prevotella melaninogenica ATCC 25845]
AMP97180.1	Glutamine--scyllo-inositol transaminase [Pedobacter cryoconitis]
ALW85863.1	transcriptional regulator [Hymenobacter sp. DG5B]
AEA22236.1	DegT/DnrJ/EryC1/StrS aminotransferase family protein [Prevotella denticola F0289]
ALJ61586.1	dTDP-3-amino-3,6-dideoxy-alpha-D-galactopyranose transaminase [Bacteroides cellulosilyticus]
AKU69879.1	aminotransferase [Prevotella fusca JCM 17724]
ADR20900.1	DegT/DnrJ/EryC1/StrS aminotransferase [Marivirga tractuosa DSM 4126]
APU95264.1	UDP-4-amino-4,6-dideoxy-N-acetyl-beta-L-altrosamine transaminase [Sphingobacterium sp. B29]
AHF11977.1	aminotransferase [Barnesiella viscericola DSM 18177]
AIM39145.1	pyridoxal phosphate-dependent aminotransferase [Sphingobacterium sp. ML3W]
AND20350.1	pyridoxal phosphate-dependent aminotransferase [Bacteroides dorei CL03T12C01]
AII68864.1	pyridoxal phosphate-dependent aminotransferase [Bacteroides dorei]
CEA15263.1	putative pyridoxal phosphate-dependent aminotransferase EpsN [Fermentimonas caenicola]
AMR32927.1	lipopolysaccharide biosynthesis protein RfbH [Mucilaginibacter sp. PAMC 26640]
ABC45732.1	perosamine synthetase, putative [Salinibacter ruber DSM 13855]
AFM02719.1	putative PLP-dependent enzyme possibly involved in cell wall biogenesis [Bernardetia litoralis DSM 6794]
CBH23616.1	perosamine synthetase, putative [Salinibacter ruber M8]
AKP71016.1	putative pyridoxal phosphate-dependent enzyme apparently involved in regulation of cell wall biogenesis [Riemerella anatipestifer]
ADZ78375.1	DegT/DnrJ/EryC1/StrS aminotransferase [Sphingobacterium sp. 21]
ALO29888.1	putative protein-translocating porin PorT [Porphyromonas gingivalis A7A1-28]
ALJ25216.1	putative protein-translocating porin PorT [Porphyromonas gingivalis 381]
AKV64412.1	putative protein-translocating porin PorT [Porphyromonas gingivalis]
BAK26017.1	membrane-associated protein PorT [Porphyromonas gingivalis TDC60]
BAG33297.1	Por secretion system protein porT/sprT [Porphyromonas gingivalis ATCC 33277]
AAQ65918.1	porT protein [Porphyromonas gingivalis W83]
ALA93691.1	putative protein-translocating porin PorT [Porphyromonas gingivalis AJW4]
ADY32193.1	probable protein-translocating porin PorT [Odoribacter splanchnicus DSM 20712]
ALO49205.1	PorT family protein [Prevotella enoeca]
APY11893.1	PorT protein [Seonamhaeicola sp. S2-3]
SCD20339.1	hypothetical protein PSM36_1519 [Proteiniphilum saccharofermentans]
ADE83417.1	porT protein [Prevotella ruminicola 23]
EFC70687.1	hypothetical protein HMPREF0669_01142 (plasmid) [Prevotella sp. oral taxon 299 str. F0039]
ADK96269.1	hypothetical protein HMPREF0659_A5397 [Prevotella melaninogenica ATCC 25845]
AKU69072.1	PorT family protein [Prevotella fusca JCM 17724]
ADQ81010.1	hypothetical protein Palpr_2881 [Paludibacter propionicigenes WB4]
AHW59068.1	hypothetical protein FH5T_04260 [Draconibacterium orientale]
ALM20683.1	PorT protein [Nonlabens sp. MIC269]
AFL80037.1	putative protein-translocating porin PorT [Aequorivita sublithincola DSM 14238]
APU09348.1	PorT protein [Cellulophaga lytica]
ADY28482.1	PorT protein [Cellulophaga lytica DSM 7489]
AMD85950.1	PorT protein [Capnocytophaga haemolytica]
CCG52468.1	PorT protein [Flavobacterium indicum GPTSA100-9 = DSM 17447]
APG61412.1	PorT protein [Gramella sp. LPB0144]
AGA78080.1	hypothetical protein Echvi_1821 [Echinicola vietnamensis DSM 17526]
ABR43591.1	conserved hypothetical protein [Parabacteroides distasonis ATCC 8503]
SCM58928.1	putative protein {ECO:0000313|EMBL:CEA15638,1} [Petrimonas mucosa]
ABG59960.1	PorT-related protein [Cytophaga hutchinsonii ATCC 33406]
APZ45225.1	PorT protein [Polaribacter reichenbachii]
ALI98153.1	hypothetical protein DC20_03135 [Rufibacter tibetensis]
AOW21645.1	PorT protein [Lutibacter sp. LPB0138]
AOC94287.1	hypothetical protein BB050_01152 [Flavobacterium johnsoniae]
ADR22951.1	PorT-related protein [Marivirga tractuosa DSM 4126]
AOE52346.1	PorT protein [Flavobacterium psychrophilum]
AEK23021.1	PorT protein [Capnocytophaga canimorsus Cc5]
AOR27685.1	hypothetical protein FORMB_06320 [Formosa sp. Hel1_33_131]
AEL25573.1	port-related protein [Cyclobacterium marinum DSM 745]
AOW08362.1	PorT protein [Flavobacterium sp. EM1308]
APY01234.1	PorT protein [Lacinutrix venerupis]
AHM59847.1	port-related protein [Flammeovirgaceae bacterium 311]
AEE18468.1	PorT protein [Dokdonia sp. 4H-3-7-5]
ANH61697.1	hypothetical protein I597_2806 [Dokdonia donghaensis DSW-1]
EAQ38694.3	hypothetical protein MED134_01825 [Dokdonia sp. MED134]
ACU06973.1	PorT protein [Flavobacteriaceae bacterium 3519-10]
AGB27673.1	hypothetical protein Prede_0290 [Prevotella dentalis DSM 3688]
AFU67154.1	protein-translocating porin PorT [Psychroflexus torquis ATCC 700755]
ALM09092.1	PorT protein [Sediminicola sp. YIK13]
APD07360.1	hypothetical protein UJ101_01853 [Flavobacteriaceae bacterium UJ101]
EAP86809.1	porT protein [Croceibacter atlanticus HTCC2559]
EAR14297.1	porT protein [Robiginitalea biformata HTCC2501]
ADX68477.1	putative protein-translocating porin PorT [Weeksella virosa DSM 16922]
ADQ18384.1	hypothetical protein Lbys_2722 [Leadbetterella byssophila DSM 17132]
AOR25874.1	PorT-like protein [Formosa sp. Hel3_A1_48]
AMQ55737.1	port-like protein [Algoriphagus sp. M8-2]
AFL84214.1	putative protein-translocating porin PorT [Belliella baltica DSM 15883]
ANW94944.1	hypothetical protein AXE80_00930 [Wenyingzhuangia fucanilytica]
AEH00375.1	PorT protein [Lacinutrix sp. 5H-3-7-4]
AHF12965.1	porT protein [Barnesiella viscericola DSM 18177]
AEA21480.1	hypothetical protein HMPREF9137_0036 [Prevotella denticola F0289]
ALO16651.1	hypothetical protein L21SP5_03031 [bacterium L21-Spi-D4]
ADF51282.1	conserved hypothetical protein [Zunongwangia profunda SM-A87]
EAQ40583.1	hypothetical protein MED152_11134 [Polaribacter sp. MED152]
APQ16537.1	PorT protein [Maribacter sp. T28]
AMC11802.1	PorT protein [Lutibacter sp. LP1]
AEW01777.1	putative protein-translocating porin PorT [Niastella koreensis GR20-10]
AHJ98108.1	hypothetical protein Hsw_2513 [Hymenobacter swuensis DY53]
AKP51168.1	Port-related protein [Cyclobacterium amurskyense]
APS37387.1	PorT protein [Salegentibacter sp. T436]
BAR49642.1	PorT protein [Tannerella forsythia 3313]
BAR52363.1	PorT protein [Tannerella forsythia KS16]
AEW20479.1	PorT protein [Tannerella forsythia 92A2]
AII54110.1	hypothetical protein N008_19250 [Hymenobacter sp. APR13]
CAL65372.1	conserved hypothetical protein, secreted [Gramella forsetii KT0803]
ALW85977.1	hypothetical protein AUC43_13295 [Hymenobacter sp. DG5B]
AFC23652.1	PorT protein [Saprospira grandis str. Lewin]
AEE12173.1	membrane-associated protein PorT [Porphyromonas asaccharolytica DSM 20707]
ANU63167.1	hypothetical protein A4V02_05165 [Parabacteroides sp. YL27]
AOW18431.1	PorT protein [Polaribacter sp. LPB0003]
AGC76976.1	PorT protein [Nonlabens dokdonensis DSW-6]
AOH41846.1	PorT protein [Tannerella sp. oral taxon HOT-286]
CEA15638.1	hypothetical protein ING2E5B_0876 [Fermentimonas caenicola]
ALJ59190.1	hypothetical protein BcellWH2_01944 [Bacteroides cellulosilyticus]
AFJ08052.1	outer membrane protein beta-barrel domain protein [Prevotella intermedia 17]
BAR96374.1	PorT protein [Prevotella intermedia]
APW32601.1	PorT family protein [Prevotella intermedia ATCC 25611 = DSM 20706]
APG65225.1	PorT protein [Tenacibaculum sp. LPB0136]
ALU74017.1	PorT protein [Tenacibaculum dicentrarchi]
APA63525.1	PorT protein [Maribacter sp. 1_2014MBL_MicDiv]
AMM50222.1	hypothetical protein TH61_02200 [Rufibacter sp. DG15C]
AFM02892.1	putative protein-translocating porin PorT [Bernardetia litoralis DSM 6794]
APU68924.1	PorT protein [Gramella flava JLT2011]
AKA35721.1	PorT protein [Muricauda lutaonensis]
ACU93293.1	PorT protein [Capnocytophaga ochracea DSM 7271]
ALC96371.1	PorT protein [Capnocytophaga sp. oral taxon 323]
AEV32499.1	hypothetical protein Oweho_1508 [Owenweeksia hongkongensis DSM 17368]
AKQ46266.1	hypothetical protein TH63_12575 [Rufibacter sp. DG31D]
ALJ06241.1	PorT protein [Algibacter alginolytica]
ALU26225.1	PorT protein [Myroides odoratimimus]
APA92277.1	PorT protein [Myroides sp. ZB35]
AJA68983.1	Outer membrane protein beta-barrel domain [Myroides sp. A21]
AMS27397.1	hypothetical protein AEM51_10590 [Bacteroidetes bacterium UKL13-3]
AJH13832.1	PorT protein [Myroides profundi]
AEI48148.1	PorT-related protein [Runella slithyformis DSM 19594]
AND64379.1	PorT protein [Flavobacterium columnare]
CCB68492.1	PorT protein [Flavobacterium branchiophilum FL-15]
AEW85658.1	PorT protein [Flavobacterium columnare ATCC 49512]
CAL42439.1	PorT protein precursor [Flavobacterium psychrophilum JIP02/86]
AIN73239.1	PorT protein [Flavobacterium psychrophilum FPG3]
AIN70828.1	PorT protein [Flavobacterium psychrophilum FPG101]
AEE54134.1	hypothetical protein Halhy_6315 [Haliscomenobacter hydrossis DSM 1100]
ANQ50896.1	PorT-related protein [Flammeovirga sp. MY04]
ALR29901.1	PorT protein [Chryseobacterium sp. IHB B 17019]
ABQ04498.1	SprT [Flavobacterium johnsoniae UW101]
AOZ98705.1	PorT protein [Flavobacterium sp. PK15]
AFD05684.1	hypothetical protein Solca_0554 [Solitalea canadensis DSM 3403]
ADB42411.1	hypothetical protein Slin_6454 [Spirosoma linguale DSM 74]
AFK03647.1	hypothetical protein Emtol_2511 [Emticicia oligotrophica DSM 17448]
ANI90525.1	hypothetical protein A9P82_00325 [Arachidicoccus sp. BS20]
ACT95228.1	PorT-related protein [Dyadobacter fermentans DSM 18053]
AKD03444.1	PorT-like protein [Pontibacter korlensis]
ALL08014.1	porin [Pedobacter sp. PACM 27299]
AEA44351.1	probable protein-translocating porin PorT [Fluviicola taffensis DSM 16823]
AKD54041.1	PorT [Spirosoma radiotolerans]
AMJ65480.1	hypothetical protein AXW84_08600 [Hymenobacter sp. PAMC 26628]
AMR33912.1	porin [Mucilaginibacter sp. PAMC 26640]
AKP68539.1	port protein [Riemerella anatipestifer]
AFR36658.1	hypothetical protein B739_2076 [Riemerella anatipestifer RA-CH-1]
AKQ38799.1	PorT protein [Riemerella anatipestifer Yb2]
AGC40884.1	hypothetical protein G148_1580 [Riemerella anatipestifer RA-CH-2]
AFD55258.1	port protein [Riemerella anatipestifer ATCC 11845 = DSM 15868]
ADZ11289.1	PorT [Riemerella anatipestifer RA-GD]
AIH01458.1	port protein [Riemerella anatipestifer CH3]
AKK73722.1	PorT protein [Chryseobacterium gallinarum]
BAP30782.1	PorT family protein translocating porin [Chryseobacterium sp. StRB126]
ANF49328.1	PorT protein [Chryseobacterium sp. IHB B 10212]
AJR03595.1	PorT protein [Siansivirga zeaxanthinifaciens CC-SAMT-1]
CAZ94827.1	PorT protein [Zobellia galactanivorans]
AEM71082.1	PorT protein [Muricauda ruestringensis DSM 13258]
EAR00758.1	porT protein [Maribacter sp. HTCC2170]
APY07910.1	PorT protein [Winogradskyella sp. J14-2]
BAO76223.1	PorT protein [Winogradskyella sp. PG-2]
ADV49540.1	probable protein-translocating porin PorT [Cellulophaga algicola DSM 14237]
AIY13267.1	PorT protein [Cellulophaga baltica NN016038]
AIZ41625.1	PorT protein [Cellulophaga baltica 18]
ADY52517.1	probable protein-translocating porin PorT [Pseudopedobacter saltans DSM 12145]
AMR26094.1	hypothetical protein A0257_02610 [Hymenobacter sp. PAMC 26554]
ACU03200.1	hypothetical protein Phep_0978 [Pedobacter heparinus DSM 2366]
ANE53386.1	porin [Flavisolibacter sp. LCS9]
AOM78179.1	porin [Pedobacter steynii]
AIQ00212.1	port protein [Ornithobacterium rhinotracheale ORT-UMN 88]
AFL98489.1	putative protein-translocating porin PorT [Ornithobacterium rhinotracheale DSM 15997]
AKV63274.1	Peptidase family C25 [Porphyromonas gingivalis]
BAG32541.1	Por secretion system protein porU [Porphyromonas gingivalis ATCC 33277]
ABR44295.1	conserved hypothetical protein [Parabacteroides distasonis ATCC 8503]
BAR50302.1	putative lipoprotein [Tannerella forsythia 3313]
ALJ24516.1	Peptidase family C25 [Porphyromonas gingivalis 381]
ALA92666.1	Peptidase family C25 [Porphyromonas gingivalis AJW4]
ALO28814.1	Peptidase family C25 [Porphyromonas gingivalis A7A1-28]
AEW21982.1	putative lipoprotein [Tannerella forsythia 92A2]
ADQ79458.1	hypothetical protein Palpr_1312 [Paludibacter propionicigenes WB4]
AHF13062.1	hypothetical protein BARVI_10260 [Barnesiella viscericola DSM 18177]
BAR53128.1	putative lipoprotein [Tannerella forsythia KS16]
AEW03215.1	hypothetical protein Niako_6994 [Niastella koreensis GR20-10]
ACU58680.1	hypothetical protein Cpin_1182 [Chitinophaga pinensis DSM 2588]
ALO17161.1	hypothetical protein L21SP5_03553 [bacterium L21-Spi-D4]
AHJ96064.1	hypothetical protein Hsw_0469 [Hymenobacter swuensis DY53]
AMJ64522.1	hypothetical protein AXW84_03090 [Hymenobacter sp. PAMC 26628]
AMA49744.1	peptidase C25 [Flavobacterium columnare]
EAQ42160.2	hypothetical protein MED152_05560 [Polaribacter sp. MED152]
AEI48952.1	hypothetical protein Runsl_2551 [Runella slithyformis DSM 19594]
AEW86981.1	hypothetical protein FCOL_10890 [Flavobacterium columnare ATCC 49512]
ANQ51016.1	Fjo24 [Flammeovirga sp. MY04]
ADR21725.1	hypothetical protein Ftrac_1737 [Marivirga tractuosa DSM 4126]
ACU07026.1	hypothetical protein FIC_00568 [Flavobacteriaceae bacterium 3519-10]
ALJ59119.1	Peptidase family C25 [Bacteroides cellulosilyticus]
AOH40056.1	hypothetical protein BCB71_02215 [Tannerella sp. oral taxon HOT-286]
BAK24194.1	hypothetical protein PGTDC60_0023 [Porphyromonas gingivalis TDC60]
AFC25742.1	hypothetical protein SGRA_3014 [Saprospira grandis str. Lewin]
AII51459.1	hypothetical protein N008_05600 [Hymenobacter sp. APR13]
AMC12269.1	hypothetical protein Lupro_12265 [Lutibacter sp. LP1]
ALW83880.1	hypothetical protein AUC43_01420 [Hymenobacter sp. DG5B]
CCB69219.1	Protein of unknown function, putative sulfolipid biosynthesis protein PorU [Flavobacterium branchiophilum FL-15]
EAP88183.1	hypothetical protein CA2559_05470 [Croceibacter atlanticus HTCC2559]
AGC77139.1	flagellar hook capping protein, Fjo24 [Nonlabens dokdonensis DSW-6]
ADX66936.1	hypothetical protein Weevi_0214 [Weeksella virosa DSM 16922]
AAQ65281.1	hypothetical protein PG_0026 [Porphyromonas gingivalis W83]
AEE12184.1	hypothetical protein Poras_0230 [Porphyromonas asaccharolytica DSM 20707]
AHW61646.1	hypothetical protein FH5T_05690 [Draconibacterium orientale]
ANU64624.1	hypothetical protein A4V02_13430 [Parabacteroides sp. YL27]
ALD22779.1	hypothetical protein AM218_11980 [Hymenobacter sp. DG25A]
AIZ63095.1	hypothetical protein PK28_04225 [Hymenobacter sp. DG25B]
ABG60477.1	conserved hypothetical protein [Cytophaga hutchinsonii ATCC 33406]
ACY47847.1	hypothetical protein Rmar_0953 [Rhodothermus marinus DSM 4252]
ANE51032.1	hypothetical protein SY85_11490 [Flavisolibacter sp. LCS9]
AEN73826.1	hypothetical protein Rhom172_1913 [Rhodothermus marinus SG0.5JP17-172]
AKD57357.1	hypothetical protein SD10_23180 [Spirosoma radiotolerans]
AEE52630.1	hypothetical protein Halhy_4797 [Haliscomenobacter hydrossis DSM 1100]
AEV32749.1	hypothetical protein Oweho_1768 [Owenweeksia hongkongensis DSM 17368]
APZ46562.1	hypothetical protein BW723_09790 [Polaribacter reichenbachii]
ANW96514.1	hypothetical protein AXE80_09575 [Wenyingzhuangia fucanilytica]
AEA44535.1	hypothetical protein Fluta_2550 [Fluviicola taffensis DSM 16823]
APG65026.1	hypothetical protein LPB136_06490 [Tenacibaculum sp. LPB0136]
AMR28652.1	hypothetical protein A0257_17135 [Hymenobacter sp. PAMC 26554]
AOC94195.1	hypothetical protein BB050_01060 [Flavobacterium johnsoniae]
CCG52621.1	Protein of unknown function precursor, putative sulfolipid biosynthesis protein PorU [Flavobacterium indicum GPTSA100-9 = DSM 17447]
AOW17225.1	hypothetical protein LPB03_06985 [Polaribacter sp. LPB0003]
AOW20312.1	hypothetical protein LPB138_06300 [Lutibacter sp. LPB0138]
AOR25737.1	peptidase, C25 family [Formosa sp. Hel3_A1_48]
EAQ38629.1	hypothetical protein MED134_12051 [Dokdonia sp. MED134]
ALJ04839.1	peptidase C25 [Algibacter alginolytica]
AEH01531.1	hypothetical protein Lacal_1683 [Lacinutrix sp. 5H-3-7-4]
ABQ04588.1	hypothetical protein Fjoh_1556 [Flavobacterium johnsoniae UW101]
AOW08298.1	peptidase C25 [Flavobacterium sp. EM1308]
ANH60109.1	Peptidase family C25 [Dokdonia donghaensis DSW-1]
AFD55293.1	hypothetical protein RA0C_0301 [Riemerella anatipestifer ATCC 11845 = DSM 15868]
AKP70396.1	hypothetical protein CG09_0096 [Riemerella anatipestifer]
ADZ11247.1	hypothetical protein RIA_0048 [Riemerella anatipestifer RA-GD]
AKQ38841.1	hypothetical protein AS87_00480 [Riemerella anatipestifer Yb2]
AGC40840.1	hypothetical protein G148_1536 [Riemerella anatipestifer RA-CH-2]
AIH01411.1	hypothetical protein M949_0240 [Riemerella anatipestifer CH3]
AFR36614.1	hypothetical protein B739_2032 [Riemerella anatipestifer RA-CH-1]
APY01004.1	peptidase C25 [Lacinutrix venerupis]
AOR28845.1	peptidase, C25 family [Formosa sp. Hel1_33_131]
AFU69269.1	secreted cysteine protease, peptidase C25 family [Psychroflexus torquis ATCC 700755]
AFL81200.1	hypothetical protein Aeqsu_1720 [Aequorivita sublithincola DSM 14238]
ANF51855.1	hypothetical protein A0O34_15645 [Chryseobacterium sp. IHB B 10212]
ALR30855.1	hypothetical protein ATE47_10085 [Chryseobacterium sp. IHB B 17019]
BAP32750.1	uncharacterized protein CHSO_3713 [Chryseobacterium sp. StRB126]
AKK71439.1	hypothetical protein OK18_01210 [Chryseobacterium gallinarum]
AFL82795.1	Peptidase family C25 [Belliella baltica DSM 15883]
AFM05173.1	hypothetical protein Fleli_2820 [Bernardetia litoralis DSM 6794]
ADB41911.1	hypothetical protein Slin_5949 [Spirosoma linguale DSM 74]
AHM62563.1	hypothetical protein D770_21570 [Flammeovirgaceae bacterium 311]
AIN73369.1	peptidase C25 [Flavobacterium psychrophilum FPG3]
AIG30175.1	peptidase C25 [Flavobacterium psychrophilum]
CAL43471.1	Por secretion system protein PorU precursor [Flavobacterium psychrophilum JIP02/86]
AIN72428.1	peptidase C25 [Flavobacterium psychrophilum FPG101]
APY10546.1	peptidase C25 [Seonamhaeicola sp. S2-3]
APY08936.1	peptidase C25 [Winogradskyella sp. J14-2]
BAO74849.1	hypothetical protein WPG_0619 [Winogradskyella sp. PG-2]
AJR02516.1	peptidase C25 [Siansivirga zeaxanthinifaciens CC-SAMT-1]
ADQ17870.1	hypothetical protein Lbys_2176 [Leadbetterella byssophila DSM 17132]
ACT95448.1	conserved hypothetical protein [Dyadobacter fermentans DSM 18053]
AFK02795.1	hypothetical protein Emtol_1650 [Emticicia oligotrophica DSM 17448]
ALO49608.1	Por secretion system protein [Prevotella enoeca]
ADE81582.1	conserved hypothetical protein [Prevotella ruminicola 23]
AEE18564.1	hypothetical protein Krodi_0579 [Dokdonia sp. 4H-3-7-5]
AKU69628.1	por secretion system C-terminal sorting domain-containing protein [Prevotella fusca JCM 17724]
AEA21785.1	hypothetical protein HMPREF9137_0683 [Prevotella denticola F0289]
ADK95508.1	hypothetical protein HMPREF0659_A5113 [Prevotella melaninogenica ATCC 25845]
AGB28471.1	Peptidase family C25 [Prevotella dentalis DSM 3688]
BAR95248.1	hypothetical protein PI172_0520 [Prevotella intermedia]
AFJ08269.1	Por secretion system C-terminal sorting domain protein [Prevotella intermedia 17]
APW31657.1	Por secretion system protein [Prevotella intermedia ATCC 25611 = DSM 20706]
EFC70390.2	hypothetical protein HMPREF0669_01370 [Prevotella sp. oral taxon 299 str. F0039]
ALM21400.1	flagellar hook capping protein, Fjo24 [Nonlabens sp. MIC269]
AEL24262.1	hypothetical protein Cycma_0484 [Cyclobacterium marinum DSM 745]
AKP49897.1	hypothetical protein CA2015_0426 [Cyclobacterium amurskyense]
AGA79064.1	Peptidase family C25 [Echinicola vietnamensis DSM 17526]
AMQ57704.1	hypothetical protein AO498_14725 [Algoriphagus sp. M8-2]
AKV63275.1	hypothetical protein PGA7_00000260 [Porphyromonas gingivalis]
AAQ65282.1	hypothetical protein PG_0027 [Porphyromonas gingivalis W83]
BAG32542.1	Por secretion system protein porV (pg27, lptO) [Porphyromonas gingivalis ATCC 33277]
BAK24195.1	hypothetical protein PGTDC60_0024 [Porphyromonas gingivalis TDC60]
ALJ24517.1	hypothetical protein PGF_00000230 [Porphyromonas gingivalis 381]
ALA92667.1	hypothetical protein PGJ_00000230 [Porphyromonas gingivalis AJW4]
ALO28815.1	hypothetical protein PGS_00000230 [Porphyromonas gingivalis A7A1-28]
ANU64455.1	hypothetical protein A4V02_12485 [Parabacteroides sp. YL27]
AGB28470.1	long-chain fatty acid transport protein [Prevotella dentalis DSM 3688]
AKU68527.1	hypothetical protein ADJ77_01305 [Prevotella fusca JCM 17724]
ACU06252.1	hypothetical protein Phep_4061 [Pedobacter heparinus DSM 2366]
AMS27581.1	hypothetical protein AEM51_11695 [Bacteroidetes bacterium UKL13-3]
APY08937.1	hypothetical protein BWZ20_11810 [Winogradskyella sp. J14-2]
ADQ79457.1	hypothetical protein Palpr_1311 [Paludibacter propionicigenes WB4]
ALJ59118.1	hypothetical protein BcellWH2_01865 [Bacteroides cellulosilyticus]
ADK95727.1	hypothetical protein HMPREF0659_A5112 [Prevotella melaninogenica ATCC 25845]
AEA21096.1	outer membrane protein transport protein, Ompp1/FadL/TodX family [Prevotella denticola F0289]
ALO49607.1	hypothetical protein AS203_11355 [Prevotella enoeca]
APW31658.1	hypothetical protein BWX39_02780 [Prevotella intermedia ATCC 25611 = DSM 20706]
BAR95249.1	hypothetical protein PI172_0521 [Prevotella intermedia]
AFJ08459.1	hypothetical protein PIN17_A0160 [Prevotella intermedia 17]
ACU58681.1	hypothetical protein Cpin_1183 [Chitinophaga pinensis DSM 2588]
AEW03216.1	hypothetical protein Niako_6995 [Niastella koreensis GR20-10]
AMQ01305.1	membrane protein [Pedobacter cryoconitis]
AJH16128.1	hypothetical protein MPR_2990 [Myroides profundi]
AOR25738.1	hypothetical protein FORMA_05570 [Formosa sp. Hel3_A1_48]
AFU69270.1	hypothetical protein P700755_002511 [Psychroflexus torquis ATCC 700755]
AFK02794.1	hypothetical protein Emtol_1649 [Emticicia oligotrophica DSM 17448]
AFM03712.1	hypothetical protein Fleli_1278 [Bernardetia litoralis DSM 6794]
EAP88182.1	hypothetical protein CA2559_05465 [Croceibacter atlanticus HTCC2559]
CAL67845.1	conserved hypothetical protein, secreted [Gramella forsetii KT0803]
ALU24963.1	hypothetical protein AS202_01705 [Myroides odoratimimus]
APA90987.1	hypothetical protein BK054_01800 [Myroides sp. ZB35]
AJA67668.1	hypothetical protein MYRA21_0458 [Myroides sp. A21]
AOR28844.1	hypothetical protein FORMB_18110 [Formosa sp. Hel1_33_131]
APY01003.1	hypothetical protein BWR22_12015 [Lacinutrix venerupis]
AMQ57705.1	hypothetical protein AO498_14730 [Algoriphagus sp. M8-2]
AFL82796.1	hypothetical protein Belba_0125 [Belliella baltica DSM 15883]
AEV32748.1	hypothetical protein Oweho_1767 [Owenweeksia hongkongensis DSM 17368]
AEL24263.1	hypothetical protein Cycma_0485 [Cyclobacterium marinum DSM 745]
AKP49898.1	Membrane protein [Cyclobacterium amurskyense]
ANI88531.1	hypothetical protein A9P82_03990 [Arachidicoccus sp. BS20]
ABR44294.1	conserved hypothetical protein [Parabacteroides distasonis ATCC 8503]
CEA16796.1	hypothetical protein ING2E5B_2067 [Fermentimonas caenicola]
AOW20311.1	hypothetical protein LPB138_06295 [Lutibacter sp. LPB0138]
ADV48085.1	hypothetical protein Celal_0750 [Cellulophaga algicola DSM 14237]
APT21680.1	hypothetical protein BU993_02935 [Flavobacterium columnare]
AEW86980.1	hypothetical protein FCOL_10885 [Flavobacterium columnare ATCC 49512]
APY10545.1	hypothetical protein BWZ22_04500 [Seonamhaeicola sp. S2-3]
AOZ98641.1	hypothetical protein BIW12_03860 [Flavobacterium sp. PK15]
AJR02515.1	hypothetical protein AW14_01475 [Siansivirga zeaxanthinifaciens CC-SAMT-1]
ANE51031.1	hypothetical protein SY85_11485 [Flavisolibacter sp. LCS9]
AGC77140.1	hypothetical protein DDD_2013 [Nonlabens dokdonensis DSW-6]
ALM21401.1	hypothetical protein AAT17_09245 [Nonlabens sp. MIC269]
AOW08299.1	hypothetical protein EM308_01560 [Flavobacterium sp. EM1308]
CAZ94955.1	Conserved hypothetical periplasmic protein [Zobellia galactanivorans]
AMC11989.1	hypothetical protein Lupro_12270 [Lutibacter sp. LP1]
APZ46563.1	hypothetical protein BW723_09795 [Polaribacter reichenbachii]
AEM69786.1	hypothetical protein Murru_0736 [Muricauda ruestringensis DSM 13258]
ALI99322.1	hypothetical protein DC20_10475 [Rufibacter tibetensis]
AFL98022.1	hypothetical protein Ornrh_1877 [Ornithobacterium rhinotracheale DSM 15997]
AIP99799.1	hypothetical protein Q785_09235 [Ornithobacterium rhinotracheale ORT-UMN 88]
AOC94196.1	hypothetical protein BB050_01061 [Flavobacterium johnsoniae]
ALW83879.1	hypothetical protein AUC43_01415 [Hymenobacter sp. DG5B]
ACT95449.1	conserved hypothetical protein [Dyadobacter fermentans DSM 18053]
ABG60478.1	conserved hypothetical protein [Cytophaga hutchinsonii ATCC 33406]
ACU92806.1	conserved hypothetical protein, secreted [Capnocytophaga ochracea DSM 7271]
SCD22160.1	hypothetical protein PSM36_3375 [Proteiniphilum saccharofermentans]
ADE83104.1	conserved hypothetical protein [Prevotella ruminicola 23]
AHW59260.1	membrane protein [Draconibacterium orientale]
AKA34486.1	hypothetical protein VC82_827 [Muricauda lutaonensis]
EAR00879.1	hypothetical protein FB2170_17381 [Maribacter sp. HTCC2170]
CCB69220.1	Protein of unknown function precursor Fjo23 [Flavobacterium branchiophilum FL-15]
ALO17160.1	hypothetical protein L21SP5_03552 [bacterium L21-Spi-D4]
AIM60890.1	hypothetical protein IX49_10275 [Cellulophaga lytica]
AEE18563.1	hypothetical protein Krodi_0578 [Dokdonia sp. 4H-3-7-5]
ANH60110.1	hypothetical protein I597_1192 [Dokdonia donghaensis DSW-1]
EAQ38630.1	hypothetical protein MED134_12056 [Dokdonia sp. MED134]
AII51460.1	hypothetical protein N008_05605 [Hymenobacter sp. APR13]
APG65027.1	hypothetical protein LPB136_06495 [Tenacibaculum sp. LPB0136]
ADY32782.1	hypothetical protein Odosp_1765 [Odoribacter splanchnicus DSM 20712]
AEE13020.1	hypothetical protein Poras_1078 [Porphyromonas asaccharolytica DSM 20707]
AOH40880.1	hypothetical protein BCB71_06910 [Tannerella sp. oral taxon HOT-286]
APQ16668.1	hypothetical protein BTR34_04650 [Maribacter sp. T28]
APA63638.1	hypothetical protein YQ22_04485 [Maribacter sp. 1_2014MBL_MicDiv]
ALM07931.1	hypothetical protein SB49_09045 [Sediminicola sp. YIK13]
AFD09259.1	hypothetical protein Solca_4269 [Solitalea canadensis DSM 3403]
APU67566.1	hypothetical protein GRFL_0842 [Gramella flava JLT2011]
AHJ96063.1	hypothetical protein Hsw_0468 [Hymenobacter swuensis DY53]
AKQ44388.1	membrane protein [Rufibacter sp. DG31D]
ALC97926.1	hypothetical protein AM608_09930 [Capnocytophaga sp. oral taxon 323]
CBH24316.1	conserved hypothetical protein, secreted [Salinibacter ruber M8]
AEW22242.1	hypothetical protein BFO_1847 [Tannerella forsythia 92A2]
BAR49196.1	hypothetical protein TF3313_1693 [Tannerella forsythia 3313]
BAR51887.1	hypothetical protein TFKS16_1646 [Tannerella forsythia KS16]
AHF13056.1	membrane protein [Barnesiella viscericola DSM 18177]
SCM55602.1	putative protein {ECO:0000313|EMBL:CEA16796,1} [Petrimonas mucosa]
AEH01532.1	hypothetical protein Lacal_1684 [Lacinutrix sp. 5H-3-7-4]
APG61112.1	hypothetical protein LPB144_12195 [Gramella sp. LPB0144]
BAO74848.1	hypothetical protein WPG_0618 [Winogradskyella sp. PG-2]
AOW17224.1	hypothetical protein LPB03_06980 [Polaribacter sp. LPB0003]
AKD02439.1	membrane protein [Pontibacter korlensis]
ANW97488.1	hypothetical protein AXE80_09570 [Wenyingzhuangia fucanilytica]
AMR28651.1	hypothetical protein A0257_17130 [Hymenobacter sp. PAMC 26554]
AFL81201.1	hypothetical protein Aeqsu_1721 [Aequorivita sublithincola DSM 14238]
AMJ64521.1	hypothetical protein AXW84_03085 [Hymenobacter sp. PAMC 26628]
ADB41912.1	hypothetical protein Slin_5950 [Spirosoma linguale DSM 74]
ADQ17871.1	hypothetical protein Lbys_2177 [Leadbetterella byssophila DSM 17132]
EFC70389.1	hypothetical protein HMPREF0669_01369 [Prevotella sp. oral taxon 299 str. F0039]
EAQ42159.1	hypothetical protein MED152_05555 [Polaribacter sp. MED152]
ABQ04587.1	hypothetical protein Fjoh_1555 [Flavobacterium johnsoniae UW101]
APS37728.1	hypothetical protein AO058_02005 [Salegentibacter sp. T436]
ADF54232.1	conserved hypothetical protein [Zunongwangia profunda SM-A87]
ANQ51017.1	Hypothetical protein MY04_3669 [Flammeovirga sp. MY04]
AGA79063.1	hypothetical protein Echvi_2824 [Echinicola vietnamensis DSM 17526]
ADX66937.1	hypothetical protein Weevi_0215 [Weeksella virosa DSM 16922]
ADR21724.1	hypothetical protein Ftrac_1736 [Marivirga tractuosa DSM 4126]
AIZ63094.1	membrane protein [Hymenobacter sp. DG25B]
ALD22780.1	hypothetical protein AM218_11985 [Hymenobacter sp. DG25A]
ALU74198.1	hypothetical protein AUW17_02465 [Tenacibaculum dicentrarchi]
ACU07025.1	hypothetical protein FIC_00567 [Flavobacteriaceae bacterium 3519-10]
ABC45622.1	conserved hypothetical protein [Salinibacter ruber DSM 13855]
EAR17154.1	hypothetical protein RB2501_09630 [Robiginitalea biformata HTCC2501]
CCG52622.1	Protein of unknown function precursor Fjo23 [Flavobacterium indicum GPTSA100-9 = DSM 17447]
AMM50508.1	membrane protein [Rufibacter sp. DG15C]
AMR30256.1	hypothetical protein A0256_01885 [Mucilaginibacter sp. PAMC 26640]
AEE52629.1	hypothetical protein Halhy_4796 [Haliscomenobacter hydrossis DSM 1100]
AKD57356.1	hypothetical protein SD10_23175 [Spirosoma radiotolerans]
AIH01410.1	hypothetical protein M949_0239 [Riemerella anatipestifer CH3]
AKP70397.1	hypothetical protein CG09_0097 [Riemerella anatipestifer]
AGC40839.1	hypothetical protein G148_1535 [Riemerella anatipestifer RA-CH-2]
AKQ38842.1	hypothetical protein AS87_00485 [Riemerella anatipestifer Yb2]
BAP32751.1	uncharacterized protein CHSO_3714 [Chryseobacterium sp. StRB126]
AFR36613.1	hypothetical protein B739_2031 [Riemerella anatipestifer RA-CH-1]
AFD55294.1	hypothetical protein RA0C_0302 [Riemerella anatipestifer ATCC 11845 = DSM 15868]
AEA44536.1	hypothetical protein Fluta_2551 [Fluviicola taffensis DSM 16823]
AKK71440.1	hypothetical protein OK18_01215 [Chryseobacterium gallinarum]
AIG30174.1	hypothetical protein IA03_06675 [Flavobacterium psychrophilum]
CAL43470.1	Por secretion system protein porV precursor [Flavobacterium psychrophilum JIP02/86]
AIN73370.1	hypothetical protein FPG3_02550 [Flavobacterium psychrophilum FPG3]
AIN72427.1	hypothetical protein FPG101_11520 [Flavobacterium psychrophilum FPG101]
AIZ40404.1	hypothetical protein M666_01680 [Cellulophaga baltica 18]
AIY12034.1	hypothetical protein M667_01675 [Cellulophaga baltica NN016038]
ADY53448.1	hypothetical protein Pedsa_2909 [Pseudopedobacter saltans DSM 12145]
ALJ04838.1	hypothetical protein APS56_06745 [Algibacter alginolytica]
AFC25741.1	hypothetical protein SGRA_3013 [Saprospira grandis str. Lewin]
AMD85912.1	hypothetical protein AXF12_10550 [Capnocytophaga haemolytica]
AEI48951.1	hypothetical protein Runsl_2550 [Runella slithyformis DSM 19594]
ALR30856.1	hypothetical protein ATE47_10090 [Chryseobacterium sp. IHB B 17019]
ANF51854.1	hypothetical protein A0O34_15640 [Chryseobacterium sp. IHB B 10212]
AOM76836.1	hypothetical protein BFS30_06445 [Pedobacter steynii]
AHM62562.1	hypothetical protein D770_21565 [Flammeovirgaceae bacterium 311]
APD07673.1	hypothetical protein UJ101_02172 [Flavobacteriaceae bacterium UJ101]
ALA72857.1	histidine kinase [Bacteroides dorei]
AND18779.1	histidine kinase [Bacteroides dorei CL03T12C01]
AEK23344.1	Conserved hypothetical protein [Capnocytophaga canimorsus Cc5]
AEN73825.1	hypothetical protein Rhom172_1912 [Rhodothermus marinus SG0.5JP17-172]
ACY47848.1	hypothetical protein Rmar_0954 [Rhodothermus marinus DSM 4252]
ALJ45196.1	hypothetical protein Bovatus_00529 [Bacteroides ovatus]
AFL79307.1	hypothetical protein Alfi_3066 [Alistipes finegoldii DSM 17242]
SCV09531.1	hypothetical protein BACOV975_03325 [Bacteroides ovatus V975]
ANU56369.1	hypothetical protein A4V03_01285 [Bacteroides caecimuris]
AKV65004.1	hypothetical protein PGA7_00018180 [Porphyromonas gingivalis]
AAQ66928.1	TPR domain protein [Porphyromonas gingivalis W83]
BAG34396.1	Por secretion system protein porW/sprE [Porphyromonas gingivalis ATCC 33277]
BAK24388.1	TPR domain-containing protein [Porphyromonas gingivalis TDC60]
ALJ26267.1	hypothetical protein PGF_00018530 [Porphyromonas gingivalis 381]
ALA94343.1	hypothetical protein PGJ_00017590 [Porphyromonas gingivalis AJW4]
ALO30459.1	hypothetical protein PGS_00017960 [Porphyromonas gingivalis A7A1-28]
AEW20329.1	tetratricopeptide repeat protein [Tannerella forsythia 92A2]
BAR51652.1	hypothetical protein TFKS16_1395 [Tannerella forsythia KS16]
ABR44855.1	TPR domain protein [Parabacteroides distasonis ATCC 8503]
AEE13181.1	Tetratricopeptide TPR_2 repeat-containing protein [Porphyromonas asaccharolytica DSM 20707]
BAR48271.1	tetratricopeptide repeat protein [Tannerella forsythia 3313]
AKU69010.1	hypothetical protein ADJ77_04090 [Prevotella fusca JCM 17724]
ADK95324.1	tetratricopeptide repeat protein [Prevotella melaninogenica ATCC 25845]
SCM55527.1	Tetratricopeptide repeat protein {ECO:0000313|EMBL:EDN88432,1} [Petrimonas mucosa]
ADE83504.1	tetratricopeptide repeat protein [Prevotella ruminicola 23]
APW31821.1	hypothetical protein BWX39_03700 [Prevotella intermedia ATCC 25611 = DSM 20706]
BAR95477.1	hypothetical protein PI172_0749 [Prevotella intermedia]
AFJ09444.1	tetratricopeptide repeat protein [Prevotella intermedia 17]
AFC23780.1	gliding motility protein SprE [Saprospira grandis str. Lewin]
AEH00911.1	hypothetical protein Lacal_1063 [Lacinutrix sp. 5H-3-7-4]
AKP50503.1	Tetratricopeptide tpr 1 repeat-containing protein [Cyclobacterium amurskyense]
[truncated: 1,053 more rows]
