# Supplementary material for: Phylogenetic comparison between Type IX Secretion System (T9SS) protein components suggests evidence of horizontal gene transfer
Source: PeerJ journal article supplement (doi:10.7717/peerj.9019), 2020-06-26
Supplement: supplemental.zip [file supplemental.zip]

Tree scale: 1

**Bacteroidetes classes**

- Bacteroidia
- Cytophagia
- Flavobacteriia
- Chitinophagia
- Sphingobacteriia
- Incertae sedis
- Saprospiria
- Unclassified

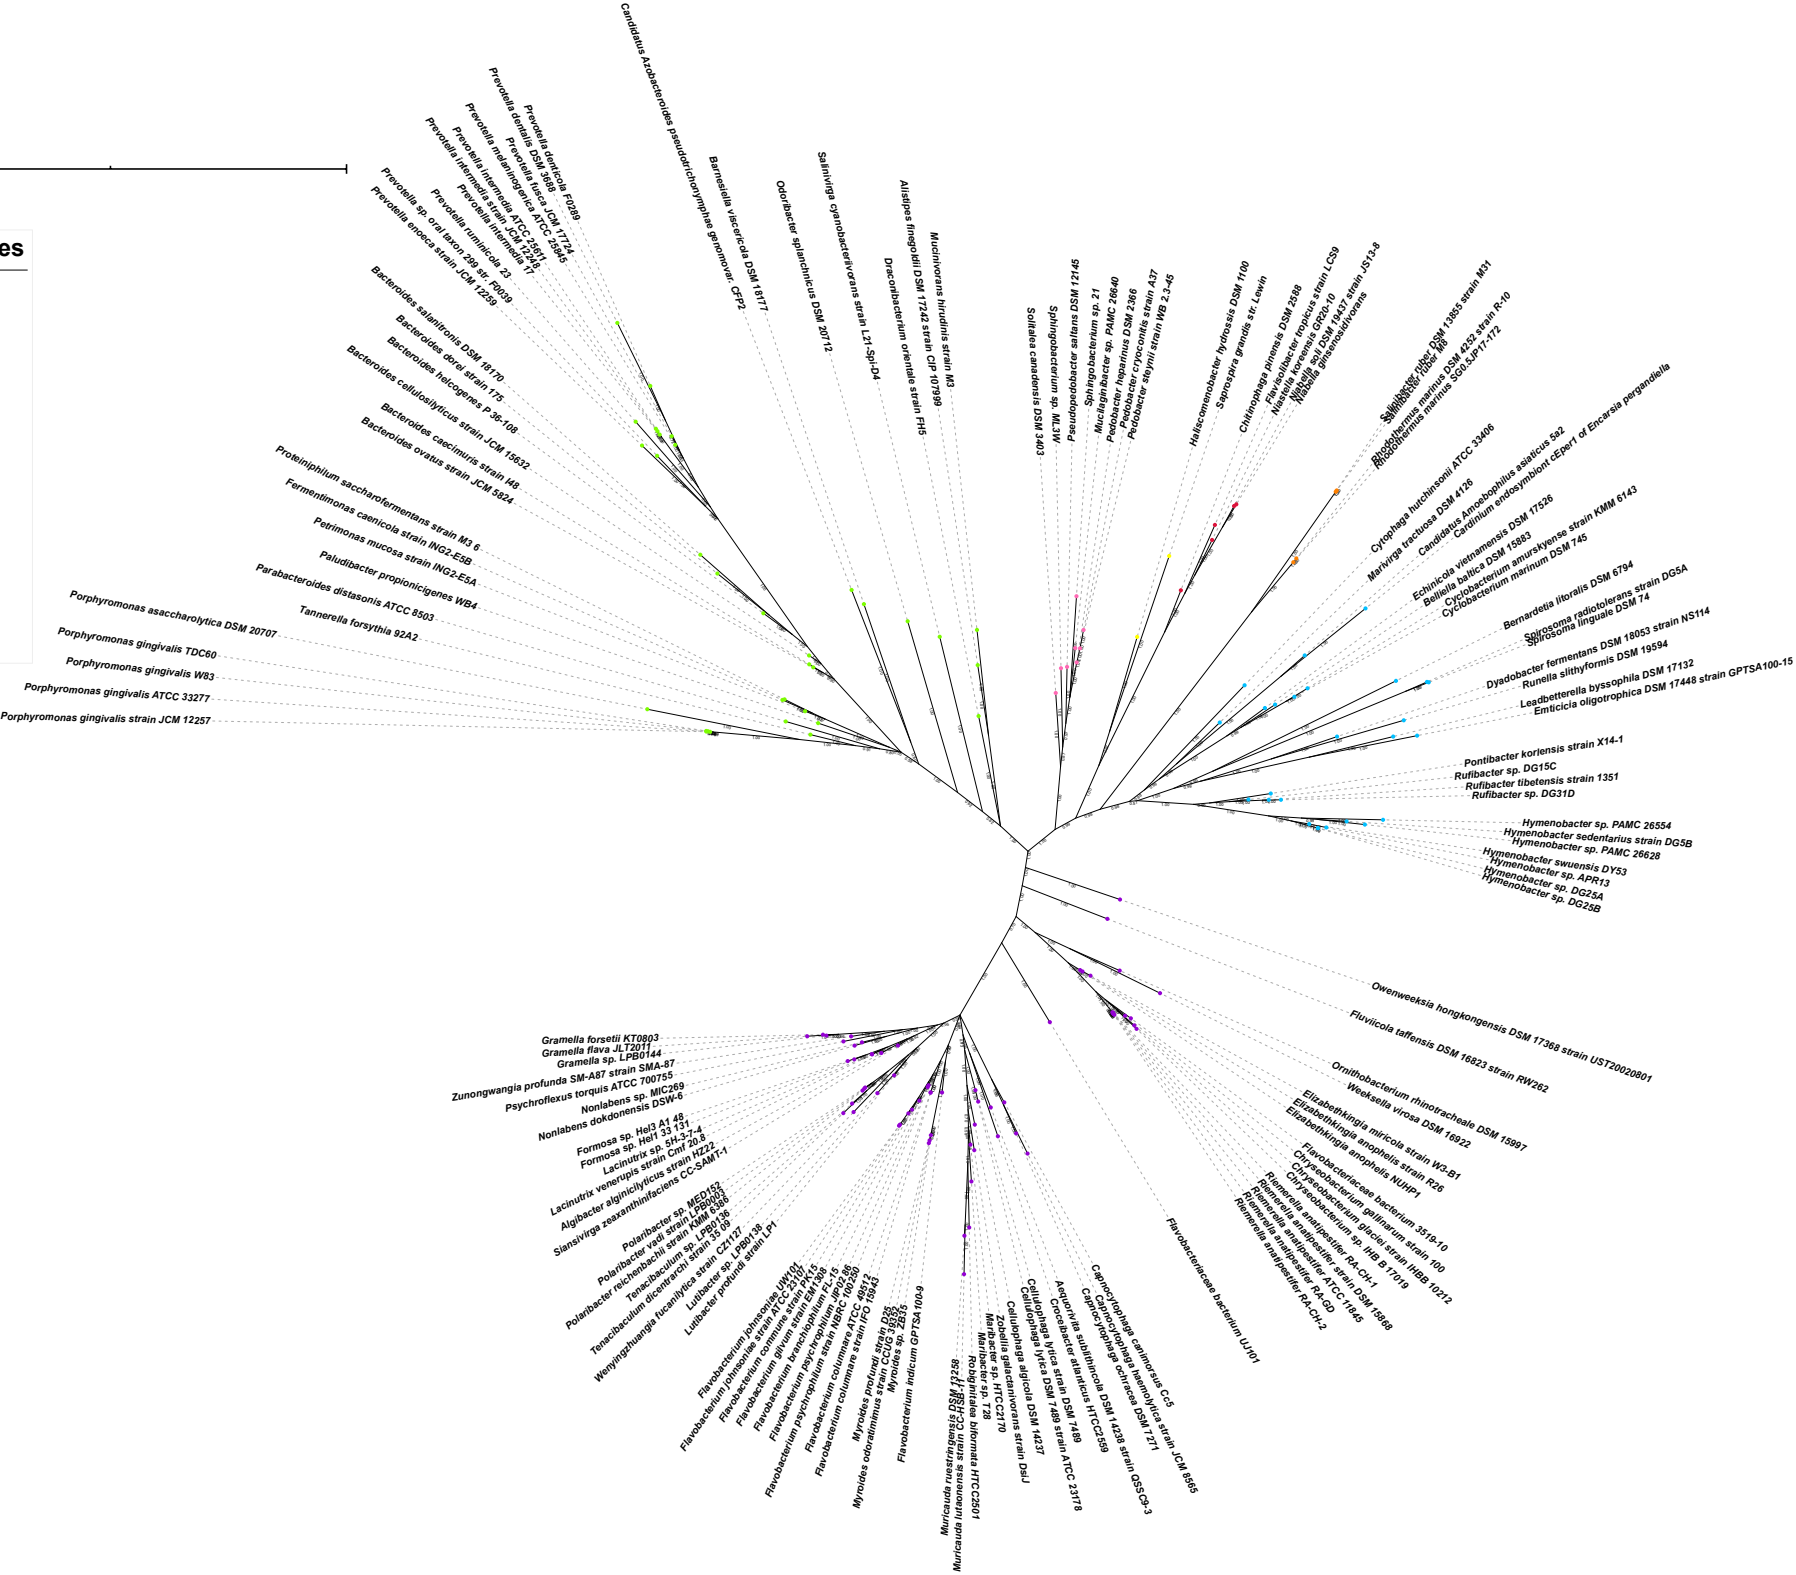

Figure S21: The BI tree of 16S rRNA with terminal nodes labelled with its corresponding species.
