# Supplementary figures and images for: Phylogenetic comparison between Type IX Secretion System (T9SS) protein components suggests evidence of horizontal gene transfer
Source: PeerJ journal article supplement (doi:10.7717/peerj.9019), 2020-06-26

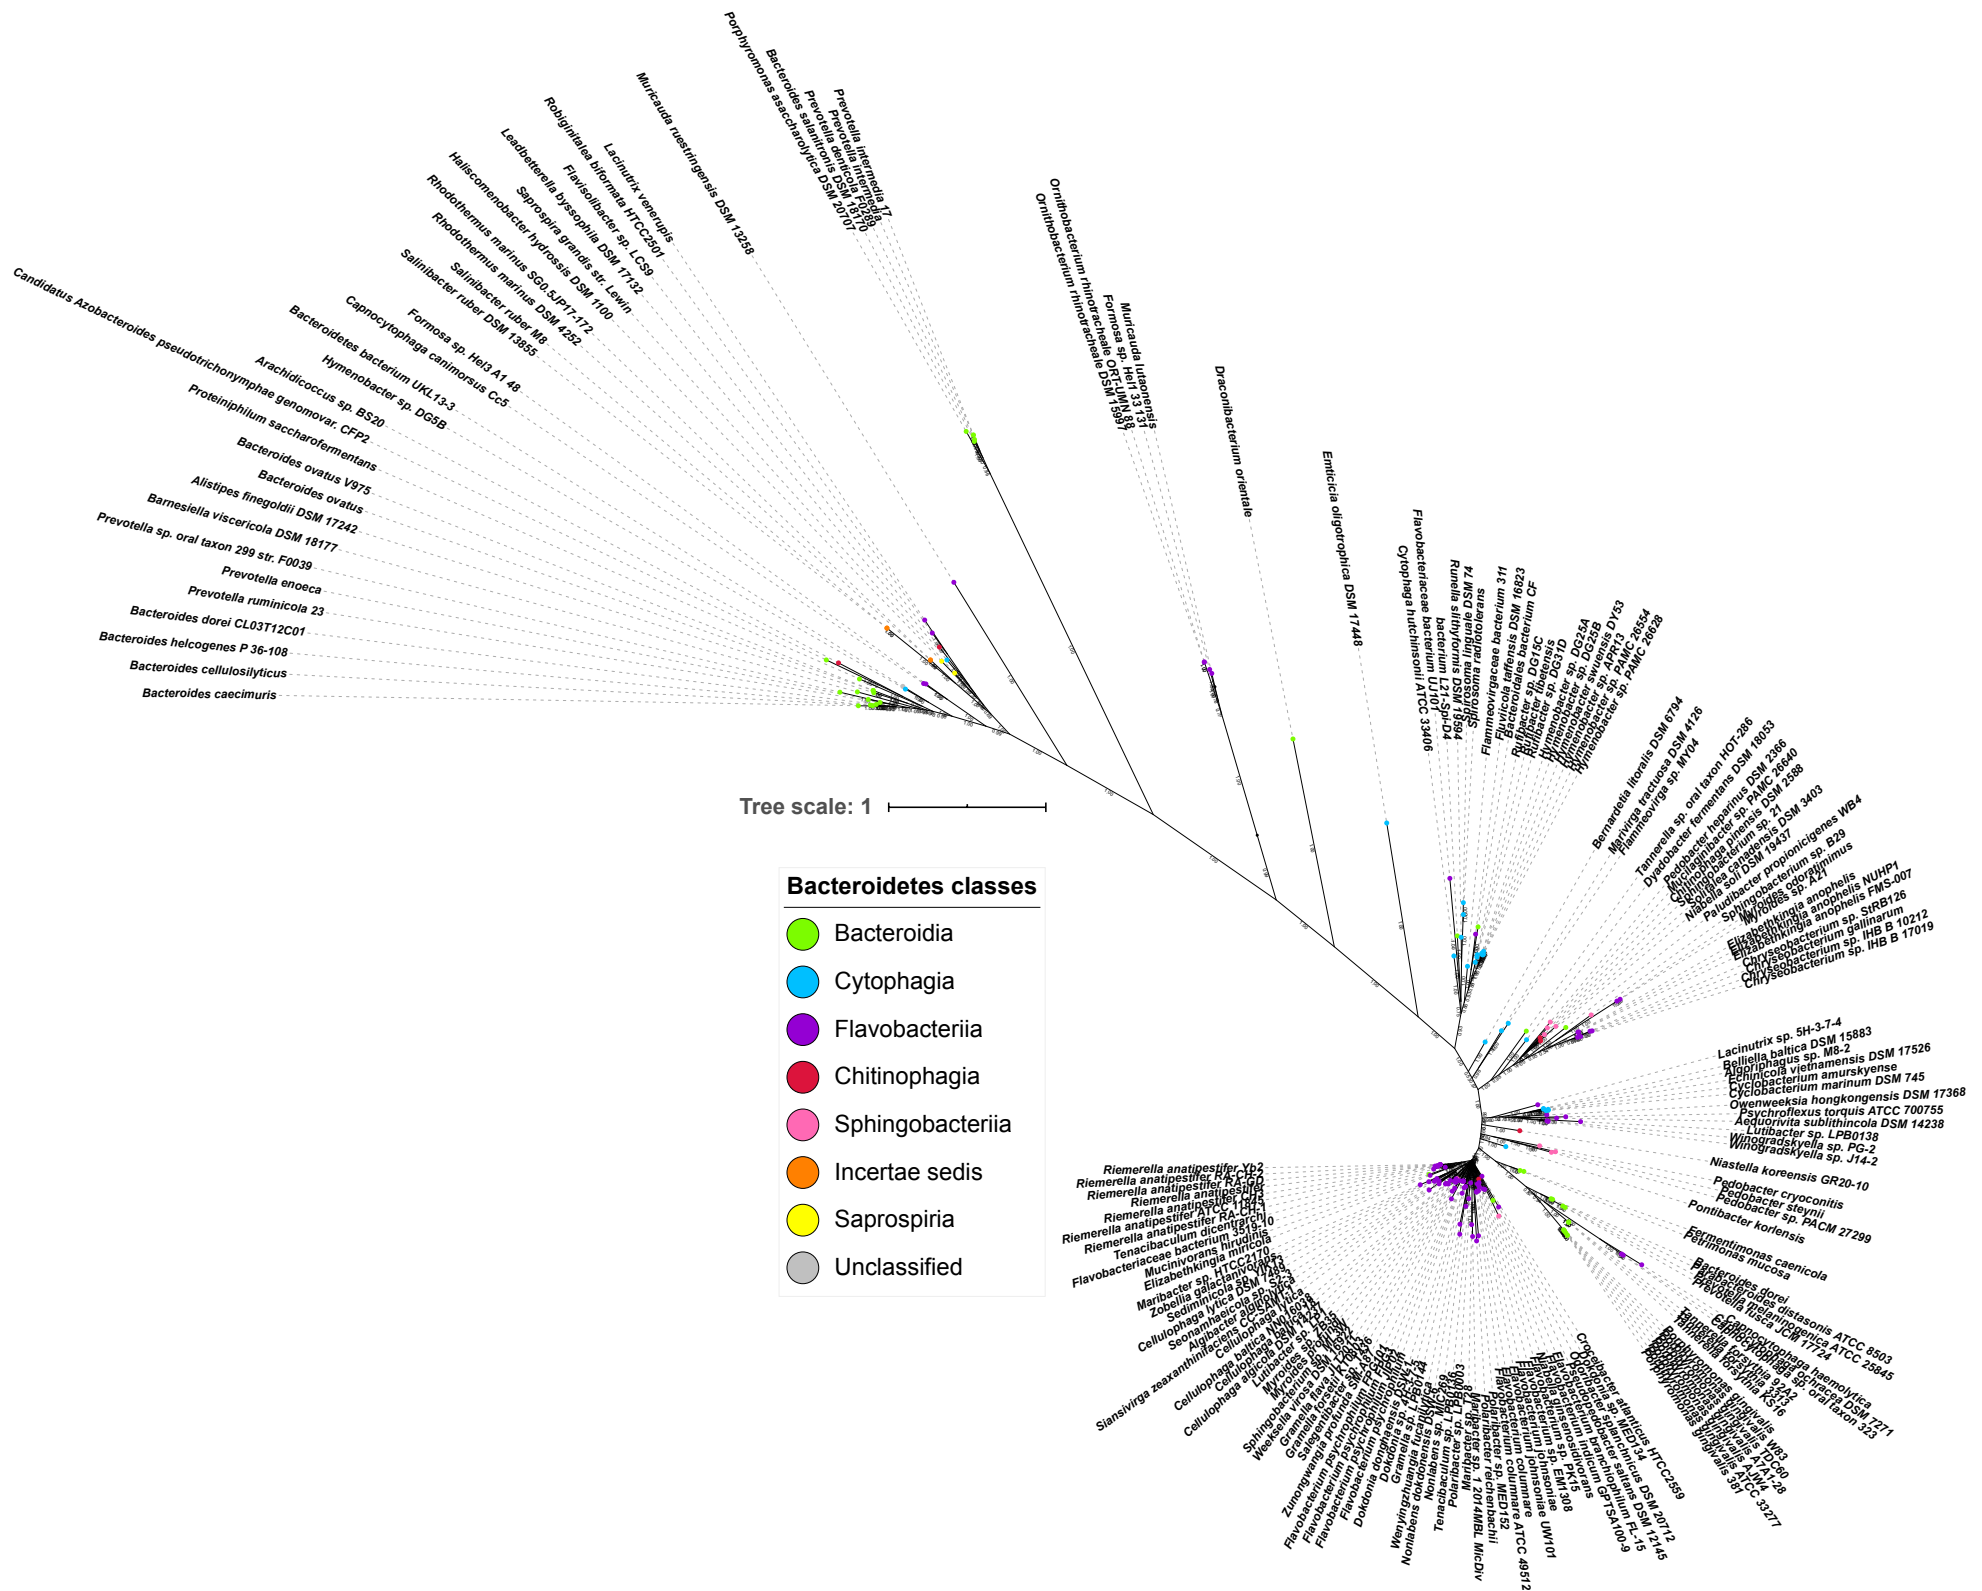

Supplement: supplemental.zip [file supplemental.zip]

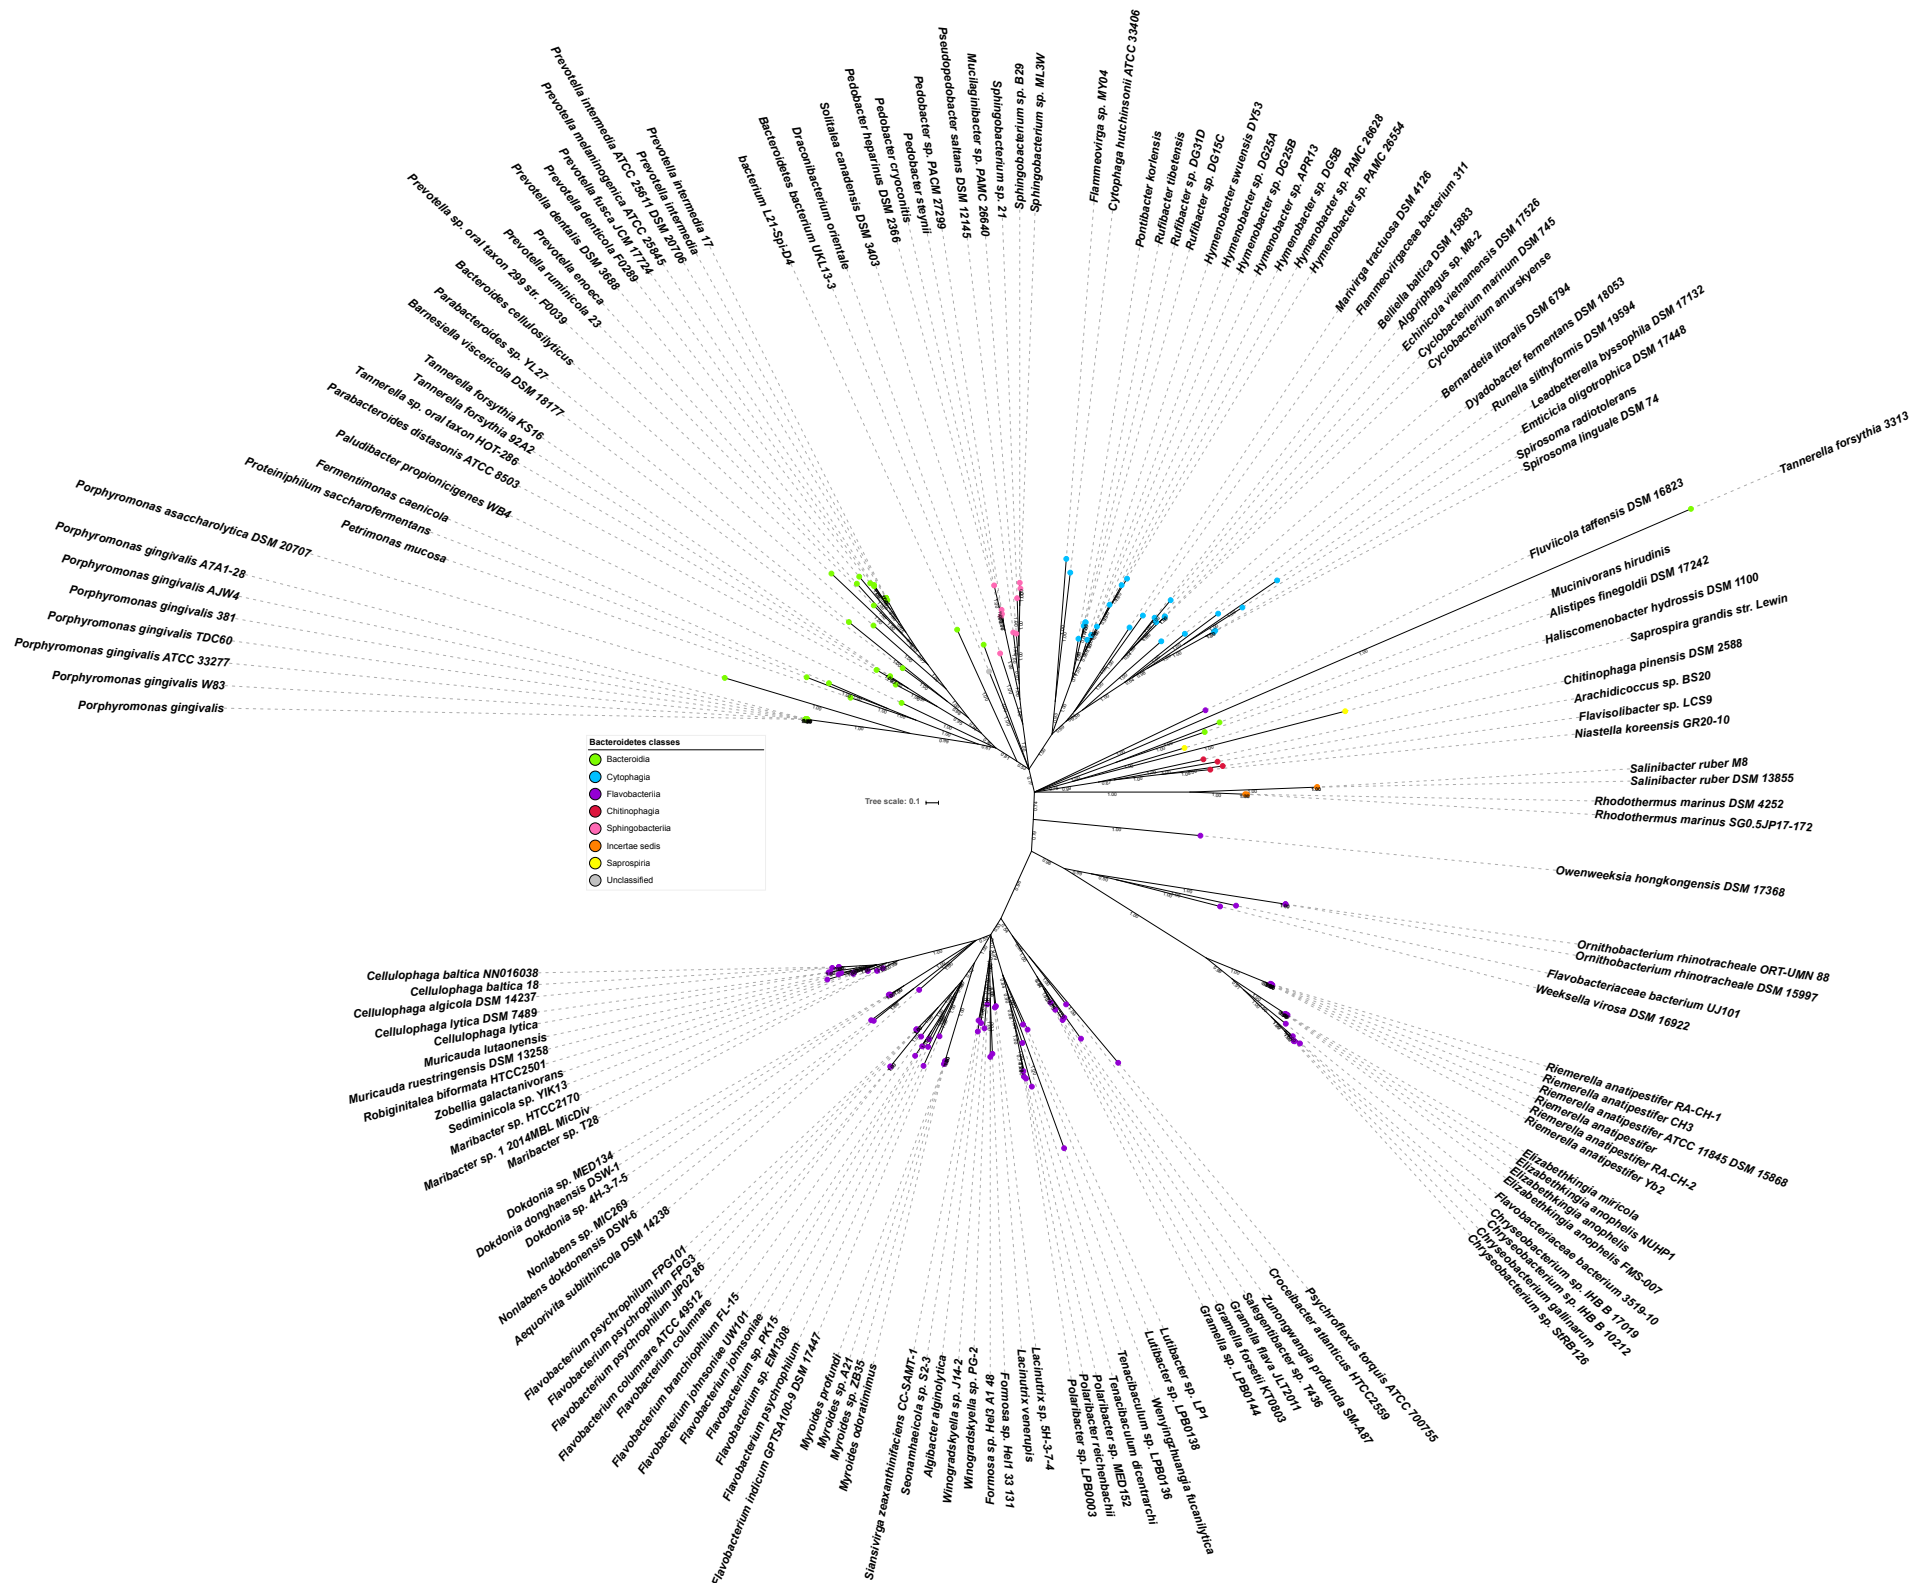

**Figure S14: The BI tree of PorY with terminal nodes labelled with its corresponding species.**

Supplement: supplemental.zip [file supplemental.zip]

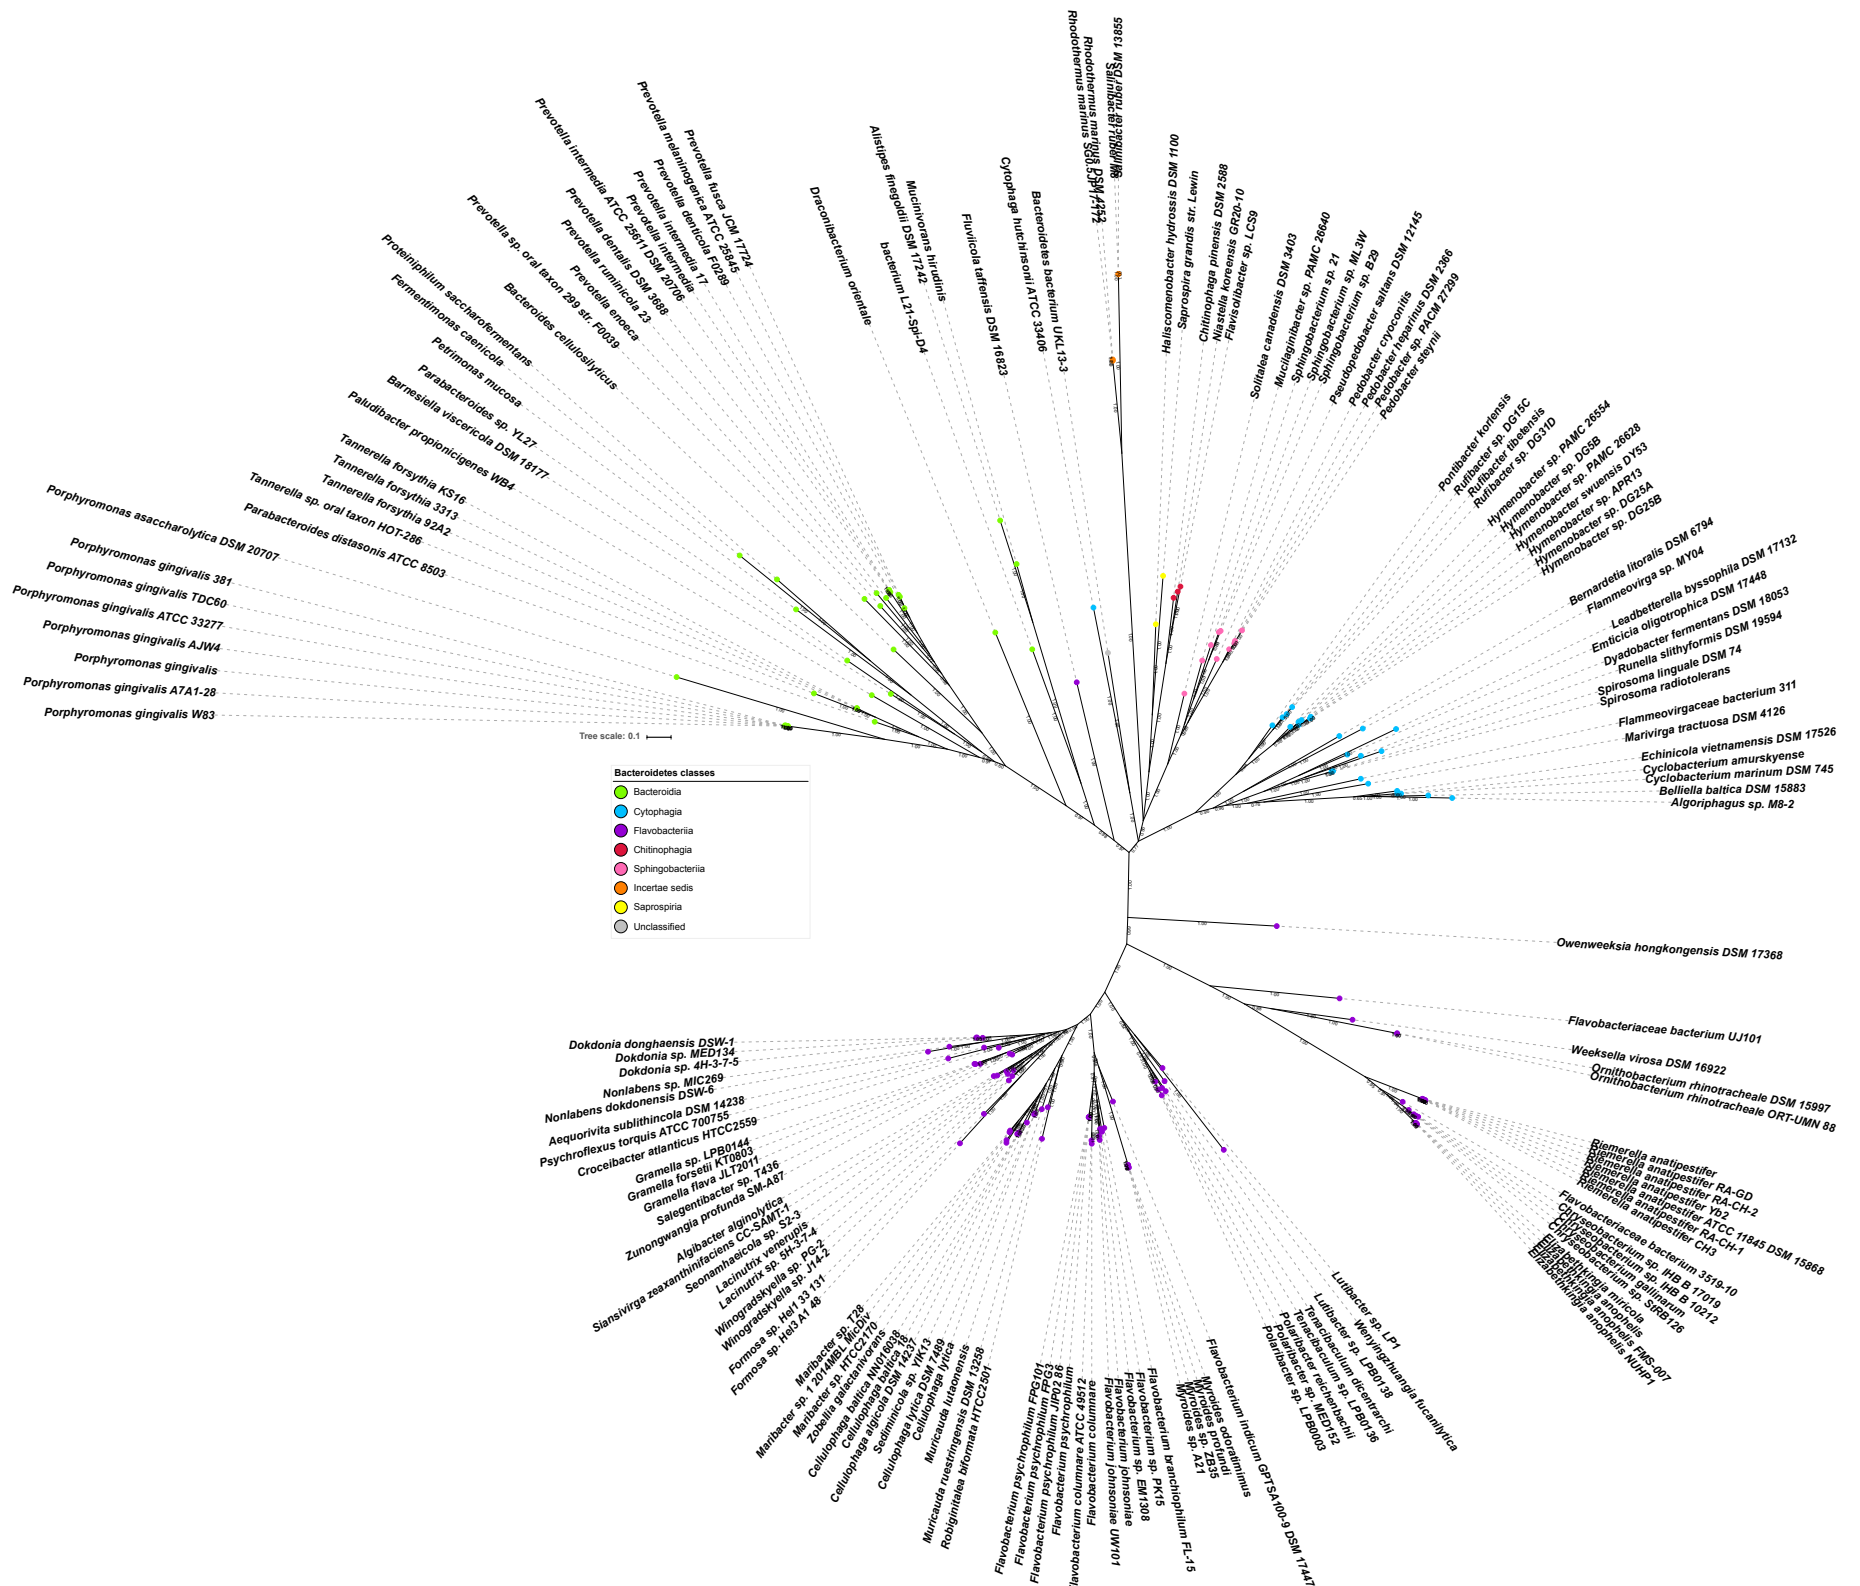

Figure S13: The BI tree of PorX with terminal nodes labelled with its corresponding species.

Supplement: supplemental.zip [file supplemental.zip]

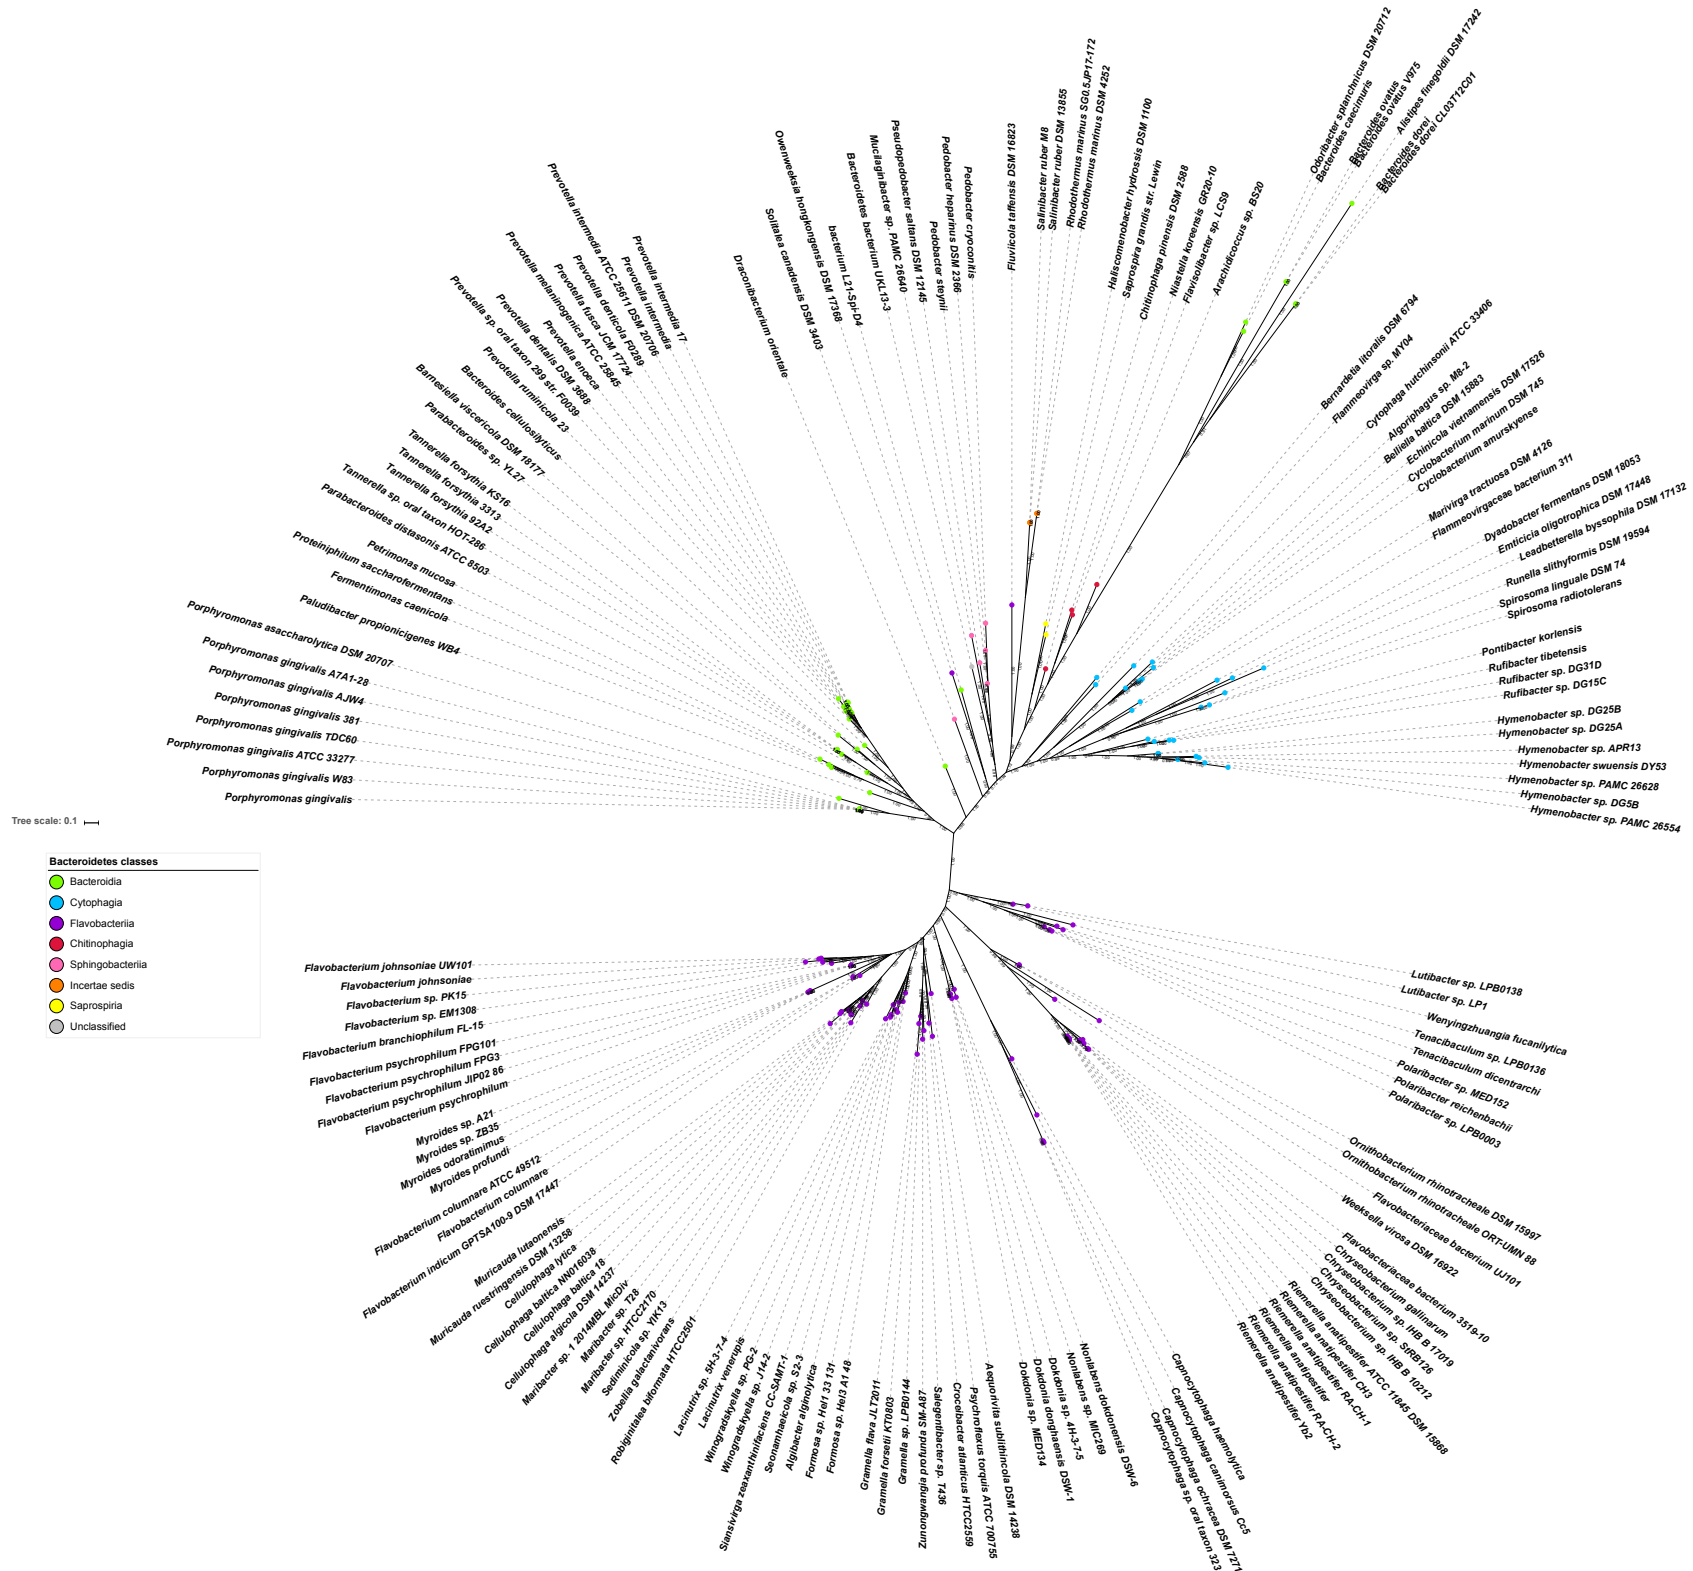

**Figure S11: The BI tree of PorV with terminal nodes labelled with its corresponding species.**

Supplement: supplemental.zip [file supplemental.zip]

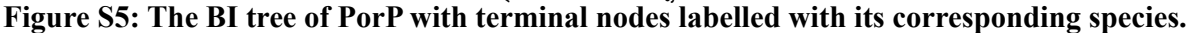

**Figure S5: The BI tree of PorP with terminal nodes labelled with its corresponding species.**

Supplement: supplemental.zip [file supplemental.zip]

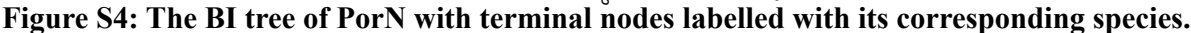

**Figure S4: The BI tree of PorN with terminal nodes labelled with its corresponding species.**

Supplement: supplemental.zip [file supplemental.zip]
